# Supplementary material for: Inhibition of PDIA3 in club cells attenuates osteopontin production and lung fibrosis
Source: HighWire-hosted journal article supplement (doi:10.1136/thoraxjnl-2021-216882), 2021-08-16
Supplement: thoraxjnl-2021-216882supp010_data_supplement.xlsx [file thoraxjnl-2021-216882supp010_data_supplement.xlsx]

## Sheet: All_BLM14 vs. PBS
	Peak List Generator: unknown
		Version: unknown
		Charge States Calculated: unknown
		Deisotoped: unknown
		Textual Annotation: unknown
	Database Set: 1 Database
		Database Name: Clarissa_Mouse_uniprot-proteome_UP000000589.fasta
			Version: unknown
			Taxonomy: All Entries
			Number of Proteins: 63628
		Does database contain common contaminants?: unknown
	Search Engine Set: 1 Search Engine
		Search Engine: Sequest
			Version: IseNode in Proteome Discoverer 2.4.0.305
			Samples: All Samples
			Fragment Tolerance: 0.020 Da (Monoisotopic)
			Parent Tolerance: 10.0 PPM (Monoisotopic)
			Fixed Modifications: +57 on C (Carbamidomethyl)
			Variable Modifications: +16 on M (Oxidation)
			Database: Clarissa_Mouse_uniprot-proteome_UP000000589.fasta (unknown version, 63628 entries)
			Digestion Enzyme: Trypsin
			Max Missed Cleavages: 2
			Probability Model:
				Mudpit_Sample 1_PBS-(1): Clarissa_QE+_0146: Use Previously Calculated Probability (No analysis) [all charge states]
				Mudpit_Sample 2_PBS-(1): Clarissa_QE+_0183: Use Previously Calculated Probability (No analysis) [all charge states]
				Mudpit_Sample 3_PBS-(1): Clarissa_QE+_0175: Use Previously Calculated Probability (No analysis) [all charge states]
				Mudpit_Sample 4_BLM 14-(1): Clarissa_QE+_0165: Use Previously Calculated Probability (No analysis) [all charge states]
				Mudpit_Sample 5_BLM 14-(1): Clarissa_QE+_0181: Use Previously Calculated Probability (No analysis) [all charge states]
				Mudpit_Sample 6_BLM 14-(1): Clarissa_QE+_0173: Use Previously Calculated Probability (No analysis) [all charge states]
				Mudpit_Sample 7_BLM 24-(1): Clarissa_QE+_0177: Use Previously Calculated Probability (No analysis) [all charge states]
				Mudpit_Sample 8_BLM 24-(1): Clarissa_QE+_0162: Use Previously Calculated Probability (No analysis) [all charge states]
				Mudpit_Sample 9_BLM 24-(1): Clarissa_QE+_0179: Use Previously Calculated Probability (No analysis) [all charge states]
				Mudpit_Control-(1): Clarissa_QE+_0167: Use Previously Calculated Probability (No analysis) [all charge states]
	Scaffold: Version: Scaffold_4.11.0
		Modification Metadata Set: 2334 modifications
			Source: C:\Program Files\Scaffold 4\parameters\unimod.xml
			Comment:
		Protein Grouping Strategy: Experiment-wide grouping with protein cluster analysis
		Peptide Thresholds: 64.0% minimum
		Protein Thresholds: 6.0% minimum and 2 peptides minimum
		Peptide FDR: 0.0% (Decoy)
		Protein FDR: 0.4% (Decoy)
		GO Annotation Source(s):
		Pathway Annotation Source(s):
		Alternate ID Source(s): FASTA:UniProt/Swiss-Prot (UniProtKB)
												Quantitative Value	Quantitative Value	Quantitative Value	Quantitative Value	Quantitative Value	Quantitative Value	Quantitative Value	Quantitative Value	Quantitative Value	Quantitative Value	Protein Identification Probability	Protein Identification Probability	Protein Identification Probability	Protein Identification Probability	Protein Identification Probability	Protein Identification Probability	Protein Identification Probability	Protein Identification Probability	Protein Identification Probability	Protein Identification Probability
												BLM 14	BLM 14	BLM 14	BLM 24	BLM 24	BLM 24	Neg IgG Control	PBS	PBS	PBS	BLM 14	BLM 14	BLM 14	BLM 24	BLM 24	BLM 24	Neg IgG Control	PBS	PBS	PBS
#	Visible?	Starred?	Identified Proteins (745/748)	Accession Number	Alternate ID	Molecular Weight	Protein Grouping Ambiguity	T-Test (p-value): (p < 0.05)	Fold Change by Category	Quantitative Profile	Taxonomy	Sample 4-(1)-BLM 14	Sample 5-(1)-BLM 14	Sample 6-(1)-BLM 14	Sample 7-(1)-BLM 24	Sample 8-(1)-BLM 24	Sample 9-(1)-BLM 24	Control-(1)	Sample 1-(1)-PBS	Sample 2-(1)-PBS	Sample 3-(1)-PBS	Sample 4-(1)-BLM 14	Sample 5-(1)-BLM 14	Sample 6-(1)-BLM 14	Sample 7-(1)-BLM 24	Sample 8-(1)-BLM 24	Sample 9-(1)-BLM 24	Control-(1)	Sample 1-(1)-PBS	Sample 2-(1)-PBS	Sample 3-(1)-PBS
1	TRUE	Empty	Protein disulfide-isomerase A3 OS=Mus musculus OX=10090 GN=Pdia3 PE=1 SV=2	P27773	Pdia3	57 kDa	TRUE	0.0092	1.2	BLM 14 high, PBS low	unknown	575	534	520	489	558	657	40	429	469	446	1	1	1	1	1	1	1	1	1	1
3.1	TRUE	Empty	Immunoglobulin heavy constant gamma 2C (Fragment) OS=Mus musculus OX=10090 GN=Ighg2c PE=1 SV=1	A0A0A6YY53	Ighg2c	37 kDa	TRUE	0.77	0.9	[]	unknown	243	182	217	204	116	133	121	128	275	290	1	1	1	1	1	1	1	1	1	1
4.1	TRUE	Empty	Immunoglobulin heavy constant gamma 2B (Fragment) OS=Mus musculus OX=10090 GN=Ighg2b PE=1 SV=2	A0A0A6YVP0	Ighg2b	44 kDa	TRUE	0.6	0.9	[]	unknown	250	229	164	200	115	114	123	186	237	285	1	1	1	1	1	1	1	1	1	1
4.2	TRUE	Empty	Ig gamma-2B chain C region OS=Mus musculus OX=10090 GN=Igh-3 PE=1 SV=3	IGG2B_MOUSE		?	TRUE	0.59	0.9	[]	unknown	213	203	141	168	102	92	101	162	207	245	1	1	1	1	0.99	0.99	1	1	1	1
5.1	TRUE	Empty	Ig gamma-1 chain C region secreted form (Fragment) OS=Mus musculus OX=10090 GN=Ighg1 PE=1 SV=1	A0A075B5P4	Ighg1	36 kDa	TRUE	0.061	0.6	[]	unknown	135	99	97	144	144	117	121	135	223	197	1	1	1	1	1	1	1	1	1	1
5.2	TRUE	Empty	Ig gamma-1 chain C region secreted form OS=Mus musculus OX=10090 GN=Ighg1 PE=1 SV=1	P01868	Ighg1	36 kDa	TRUE	0.084	0.6	[]	unknown	124	90	91	131	131	108	107	117	210	182	1	1	1	1	1	1	0.99	1	1	1
3.2	TRUE	Empty	Ig gamma-2A chain C region secreted form OS=Mus musculus OX=10090 PE=1 SV=1	P01864		37 kDa	TRUE	0.38	0.8	[]	unknown	128	118	100	138	70	99	102	91	163	170	0.99	0.94	0.91	0.79	0.7	0.76	0.74	0.66	0.97	0.84
6	TRUE	Empty	Immunoglobulin heavy constant gamma 3 (Fragment) OS=Mus musculus OX=10090 GN=Ighg3 PE=4 SV=1	A0A075B5P5 (+2)	Ighg3	36 kDa	TRUE	0.079	0.6	[]	unknown	82	76	79	108	89	82	82	87	152	156	1	1	1	1	1	1	1	1	1	1
7	TRUE	Empty	Immunoglobulin kappa constant OS=Mus musculus OX=10090 GN=Igkc PE=1 SV=2	P01837	Igkc	12 kDa		0.031	0.6	BLM 14 low, PBS high	unknown	104	64	61	103	53	52	66	112	146	148	1	1	1	1	1	1	1	1	1	1
8	TRUE	Empty	Serum albumin OS=Mus musculus OX=10090 GN=Alb PE=1 SV=3	P07724	Alb	69 kDa		0.34	1.7	[]	unknown	104	52	201	54	62	102	78	78	55	81	1	1	1	1	1	1	1	1	1	1
2.1	TRUE	Empty	Keratin, type II cytoskeletal 5 OS=Mus musculus OX=10090 GN=Krt5 PE=1 SV=1	Q922U2	Krt5	62 kDa	TRUE	0.061	1.5	[]	unknown	70	62	87	125	82	56	85	56	41	54	1	1	1	1	1	1	1	1	1	1
13	TRUE	Empty	Catalase OS=Mus musculus OX=10090 GN=Cat PE=1 SV=4	P24270	Cat	60 kDa	TRUE	0.47	1.1	[]	unknown	81	58	75	61	88	67	0.5	72	59	64	1	1	1	1	1	1	0	1	1	1
2.2	TRUE	Empty	Vimentin OS=Mus musculus OX=10090 GN=Vim PE=1 SV=3	P20152	Vim	54 kDa	TRUE	0.042	30	BLM 14 high, PBS low	unknown	48	97	33	94	35	50	228	0.5	0.5	5	1	1	1	1	1	1	1	0	0	0.75
11.1	TRUE	Empty	Actin, cytoplasmic 2 OS=Mus musculus OX=10090 GN=Actg1 PE=1 SV=1	P63260	Actg1	42 kDa	TRUE	0.086	3.9	[]	unknown	71	126	39	72	30	45	152	10	24	26	1	1	1	1	1	1	1	1	1	1
14	TRUE	Empty	Isoform 2 of Peroxisomal NADH pyrophosphatase NUDT12 OS=Mus musculus OX=10090 GN=Nudt12	NUD12_MOUSE		?		0.066	1.9	[]	unknown	61	81	73	76	91	59	0.5	14	44	55	1	1	1	1	1	1	0	1	1	1
16	TRUE	Empty	Beta-globin OS=Mus musculus OX=10090 GN=Hbb-bs PE=1 SV=1	A8DUK4	Hbb-bs	16 kDa		0.43	0.7	[]	unknown	35	21	114	22	29	24	46	86	88	73	1	1	1	1	1	1	1	1	1	1
17	TRUE	Empty	Clathrin heavy chain 1 OS=Mus musculus OX=10090 GN=Cltc PE=1 SV=3	Q68FD5	Cltc	192 kDa		0.023	1.8	BLM 14 high, PBS low	unknown	64	66	84	56	61	68	14	49	42	28	1	1	1	1	1	1	1	1	1	1
2.3	TRUE	Empty	Keratin, type II cytoskeletal 2 epidermal OS=Mus musculus OX=10090 GN=Krt2 PE=1 SV=1	Q3TTY5	Krt2	71 kDa	TRUE	0.02	1.3	BLM 14 high, PBS low	unknown	54	46	56	92	60	46	61	42	37	39	1	1	1	1	1	1	1	1	1	1
9.1	TRUE	Empty	Keratin, type I cytoskeletal 10 OS=Mus musculus OX=10090 GN=Krt10 PE=1 SV=1	A2A513 (+1)	Krt10	57 kDa	TRUE	0.9	1	[]	unknown	51	37	49	87	50	41	55	64	42	35	1	1	1	1	1	1	1	1	1	1
2.4	TRUE	Empty	Keratin, type II cytoskeletal 1 OS=Mus musculus OX=10090 GN=Krt1 PE=1 SV=4	P04104	Krt1	66 kDa	TRUE	0.061	1.3	[]	unknown	56	46	51	74	57	38	51	45	40	33	1	1	1	1	1	1	1	1	1	1
2.5	TRUE	Empty	Keratin, type II cytoskeletal 6A OS=Mus musculus OX=10090 GN=Krt6a PE=1 SV=3	P50446	Krt6a	59 kDa	TRUE	0.06	1.3	[]	unknown	50	41	56	77	55	38	56	39	32	38	1	1	1	1	1	1	1	1	1	0.96
15.1	TRUE	Empty	Tubulin beta-5 chain OS=Mus musculus OX=10090 GN=Tubb5 PE=1 SV=1	P99024	Tubb5	50 kDa	TRUE	0.0052	2.8	BLM 14 high, PBS low	unknown	61	68	70	65	48	45	41	10	25	35	1	1	1	1	1	1	1	0.93	1	1
15.2	TRUE	Empty	Tubulin beta-4B chain OS=Mus musculus OX=10090 GN=Tubb4b PE=1 SV=1	P68372	Tubb4b	50 kDa	TRUE	0.0078	2.7	BLM 14 high, PBS low	unknown	54	66	64	66	51	45	41	10	26	33	1	1	1	1	1	1	1	1	1	1
10.1	TRUE	Empty	Immunoglobulin heavy variable V1-42 OS=Mus musculus OX=10090 GN=Ighv1-42 PE=1 SV=1	A0A075B5V6	Ighv1-42	11 kDa	TRUE	0.42	0.8	[]	unknown	36	57	35	51	35	37	36	36	56	67	1	1	1	1	1	1	1	1	1	1
10.2	TRUE	Empty	Immunoglobulin heavy variable V1-18 (Fragment) OS=Mus musculus OX=10090 GN=Ighv1-18 PE=1 SV=1	A0A0A6YXN4	Ighv1-18	13 kDa	TRUE	0.87	0.9	[]	unknown	35	61	38	47	33	36	38	23	51	68	1	1	1	1	1	1	1	1	1	1
11.2	TRUE	Empty	Actin, alpha cardiac muscle 1 OS=Mus musculus OX=10090 GN=Actc1 PE=1 SV=1	P68033	Actc1	42 kDa	TRUE	0.17	3.7	[]	unknown	45	98	20	47	17	26	118	6	17	21	1	1	0.99	1	0.71	0.73	1	0.55	0.78	1
22	TRUE	Empty	Arf-GAP with SH3 domain, ANK repeat and PH domain-containing protein 2 OS=Mus musculus OX=10090 GN=Asap2 PE=1 SV=3	ASAP2_MOUSE		?		0.14	1.3	[]	unknown	62	44	41	47	47	41	0.5	36	39	36	1	1	1	1	1	1	0	1	1	1
11.3	TRUE	Empty	Actin, gamma-enteric smooth muscle OS=Mus musculus OX=10090 GN=Actg2 PE=1 SV=1	P63268	Actg2	42 kDa	TRUE	1	1	[]	unknown	0.5	0.5	0.5	0.5	0.5	0.5	0.5	0.5	0.5	0.5	0	0	0	0	0	0	0	0	0	0
9.2	TRUE	Empty	Keratin, type I cytoskeletal 15 OS=Mus musculus OX=10090 GN=Krt15 PE=1 SV=1	B1AQ77 (+1)	Krt15	49 kDa	TRUE	0.42	1.2	[]	unknown	42	30	49	80	39	29	41	45	27	27	0.46	0.64	0.43	0.75	0.57	0.32	0.32	0.36	0.38	0.32
23	TRUE	Empty	Calreticulin OS=Mus musculus OX=10090 GN=Calr PE=1 SV=1	P14211	Calr	48 kDa		0.14	0.7	[]	unknown	49	28	32	36	60	41	0.5	45	48	58	1	1	1	1	1	1	0	1	1	1
2.6	TRUE	Empty	Keratin, type II cytoskeletal 75 OS=Mus musculus OX=10090 GN=Krt75 PE=1 SV=1	Q8BGZ7	Krt75	60 kDa	TRUE	0.053	1.3	[]	unknown	43	33	42	63	44	34	44	28	27	33	0.32	0.33	0.99	1	0.99	0.3	0.99	0.3	0.32	0.3
2.7	TRUE	Empty	Keratin, type II cytoskeletal 2 oral OS=Mus musculus OX=10090 GN=Krt76 PE=1 SV=1	Q3UV17	Krt76	63 kDa	TRUE	0.28	1.2	[]	unknown	34	32	40	63	46	37	40	33	24	34	1	1	1	1	1	1	1	1	1	1
9.3	TRUE	Empty	Keratin, type I cytoskeletal 14 OS=Mus musculus OX=10090 GN=Krt14 PE=1 SV=2	Q61781	Krt14	53 kDa	TRUE	0.43	1.2	[]	unknown	31	32	48	69	35	28	45	42	25	22	0.78	1	0.94	0.96	0.79	0.79	0.95	0.82	0.84	0.67
24	TRUE	Empty	Tapasin OS=Mus musculus OX=10090 GN=Tapbp PE=1 SV=1	Q3TCU5 (+1)	Tapbp	50 kDa		0.73	1.1	[]	unknown	44	34	36	52	48	40	0.5	22	42	42	1	1	1	1	1	1	0	1	1	1
15.3	TRUE	Empty	Tubulin beta-2A chain OS=Mus musculus OX=10090 GN=Tubb2a PE=1 SV=1	Q7TMM9	Tubb2a	50 kDa	TRUE	0.0038	3	BLM 14 high, PBS low	unknown	48	54	57	53	40	38	31	8	19	26	1	1	1	1	1	1	1	0.83	1	0.97
2.8	TRUE	Empty	Keratin, type II cytoskeletal 73 OS=Mus musculus OX=10090 GN=Krt73 PE=1 SV=1	Q6NXH9	Krt73	59 kDa	TRUE	0.2	1.1	[]	unknown	35	36	37	58	42	30	40	37	29	30	0.47	0.38	0.43	0.97	0.56	0.39	0.99	0.94	0.36	0.31
20.1	TRUE	Empty	Ig kappa chain V-V region HP R16.7 OS=Mus musculus OX=10090 PE=1 SV=1	P01644 (+1)		12 kDa	TRUE	0.074	0.6	[]	unknown	30	45	23	32	19	17	33	54	57	43	1	1	1	1	1	1	1	1	1	1
2.9	TRUE	Empty	Keratin, type II cytoskeletal 1b OS=Mus musculus OX=10090 GN=Krt77 PE=1 SV=1	Q6IFZ6	Krt77	61 kDa	TRUE	0.061	1.3	[]	unknown	43	33	37	61	42	27	37	31	30	29	0.56	0.49	0.79	1	0.53	0.49	0.58	0.49	0.58	0.54
26.1	TRUE	Empty	Tubulin alpha-1C chain OS=Mus musculus OX=10090 GN=Tuba1c PE=1 SV=1	P68373	Tuba1c	50 kDa	TRUE	0.017	1.8	BLM 14 high, PBS low	unknown	49	37	50	41	31	35	31	20	26	30	1	1	1	1	1	1	1	1	1	1
20.2	TRUE	Empty	Ig kappa chain V-V region HP 124E1 OS=Mus musculus OX=10090 PE=1 SV=1	P01647		12 kDa	TRUE	1	1	[]	unknown	0.5	0.5	0.5	0.5	0.5	0.5	0.5	0.5	0.5	0.5	0	0	0	0	0	0	0	0	0	0
10.3	TRUE	Empty	Immunoglobulin heavy variable V1-43 OS=Mus musculus OX=10090 GN=Ighv1-43 PE=4 SV=1	A0A075B5V7 (+1)	Ighv1-43	11 kDa	TRUE	0.3	0.7	[]	unknown	31	35	25	39	27	30	34	26	42	56	0.93	1	1	0.99	0.21	0.46	1	0.99	1	1
19.1	TRUE	Empty	Immunoglobulin heavy variable 1-81 (Fragment) OS=Mus musculus OX=10090 GN=Ighv1-81 PE=4 SV=1	A0A075B5Y4	Ighv1-81	13 kDa	TRUE	0.85	1	[]	unknown	42	44	28	34	20	32	26	29	38	52	1	1	1	1	1	1	1	1	1	1
2.1	TRUE	Empty	Keratin, type II cytoskeletal 8 OS=Mus musculus OX=10090 GN=Krt8 PE=1 SV=4	P11679	Krt8	55 kDa	TRUE	0.0084	1.6	BLM 14 high, PBS low	unknown	35	39	30	50	35	25	56	21	21	23	0.75	1	0.96	1	0.85	0.68	1	0.64	0.8	0.68
27	TRUE	Empty	Immunoglobulin kappa variable 8-28 OS=Mus musculus OX=10090 GN=Igkv8-28 PE=1 SV=7	A0A075B5N3	Igkv8-28	11 kDa	TRUE	0.051	0.7	[]	unknown	39	26	26	38	18	26	14	47	39	47	1	1	1	1	1	1	1	1	1	1
2.11	TRUE	Empty	Keratin, type II cytoskeletal 79 OS=Mus musculus OX=10090 GN=Krt79 PE=1 SV=2	Q8VED5	Krt79	58 kDa	TRUE	0.1	1.2	[]	unknown	36	27	32	53	35	27	31	25	26	27	1	1	1	1	1	1	1	1	1	1
10.4	TRUE	Empty	Immunoglobulin heavy variable V1-20 OS=Mus musculus OX=10090 GN=Ighv1-20 PE=4 SV=1	A0A075B5U6 (+1)	Ighv1-20	13 kDa	TRUE	0.36	0.7	[]	unknown	28	32	23	43	27	28	25	21	39	51	0.46	0.47	0.47	1	0.46	0.46	0.46	0.28	0.89	0.46
9.4	TRUE	Empty	Keratin, type I cytoskeletal 16 OS=Mus musculus OX=10090 GN=Krt16 PE=1 SV=3	Q9Z2K1	Krt16	52 kDa	TRUE	0.57	1.2	[]	unknown	24	24	44	57	30	24	33	36	19	21	1	1	1	1	1	1	1	1	1	1
28	TRUE	Empty	Immunoglobulin kappa variable 6-23 (Fragment) OS=Mus musculus OX=10090 GN=Igkv6-23 PE=4 SV=2	A0A140T8N5	Igkv6-23	13 kDa	TRUE	0.0028	0.6	BLM 14 low, PBS high	unknown	25	25	23	27	21	30	29	36	42	44	1	1	1	1	1	1	1	1	1	1
9.5	TRUE	Empty	Keratin, type I cytoskeletal 17 OS=Mus musculus OX=10090 GN=Krt17 PE=1 SV=3	Q9QWL7	Krt17	48 kDa	TRUE	0.28	1.3	[]	unknown	31	24	38	57	29	19	35	31	23	19	0.99	1	1	1	0.98	0.97	1	0.98	0.99	0.98
29.1	TRUE	Empty	Ig lambda-2 chain C region OS=Mus musculus OX=10090 GN=Iglc2 PE=1 SV=1	P01844 (+1)	Iglc2	11 kDa	TRUE	0.068	0.4	[]	unknown	26	24	14	31	13	15	35	40	37	70	1	1	1	1	1	1	1	1	1	1
31	TRUE	Empty	Immunoglobulin lambda constant 1 (Fragment) OS=Mus musculus OX=10090 GN=Iglc1 PE=4 SV=1	A0A0G2JE99 (+1)	Iglc1	12 kDa		0.075	0.4	[]	unknown	23	28	23	27	6	5	18	36	55	84	1	1	1	1	1	1	1	1	1	1
30	TRUE	Empty	Immunoglobulin kappa variable 6-13 OS=Mus musculus OX=10090 GN=Igkv6-13 PE=1 SV=7	A0A075B5N7	Igkv6-13	10 kDa	TRUE	0.012	0.4	BLM 14 low, PBS high	unknown	27	20	12	28	13	23	22	51	45	38	1	1	0.92	1	0.96	1	1	1	1	1
12.1	TRUE	Empty	Ig kappa chain V-III region 50S10.1 OS=Mus musculus OX=10090 PE=1 SV=1	P03977		12 kDa	TRUE	0.073	0.5	[]	unknown	14	18	28	38	12	13	20	31	36	56	0.76	0.99	1	1	0.99	1	1	1	1	1
32	TRUE	Empty	Immunoglobulin kappa chain variable 19-93 OS=Mus musculus OX=10090 GN=Igkv19-93 PE=1 SV=7	A0A075B6D5 (+1)	Igkv19-93	13 kDa	TRUE	0.11	0.5	[]	unknown	42	14	13	34	14	13	20	37	52	45	1	1	1	1	1	1	1	1	1	1
2.12	TRUE	Empty	Predicted pseudogene 5478 OS=Mus musculus OX=10090 GN=Gm5478 PE=1 SV=1	A0A2R8VHP3	Gm5478	58 kDa	TRUE	0.055	1.4	[]	unknown	32	29	31	49	30	23	29	26	17	25	1	1	1	1	1	1	1	1	1	1
18.1	TRUE	Empty	Immunoglobulin kappa chain variable 8-27 OS=Mus musculus OX=10090 GN=Igkv8-27 PE=4 SV=1	A0A075B5N4	Igkv8-27	11 kDa	TRUE	0.048	0.6	BLM 14 low, PBS high	unknown	34	18	21	30	15	22	23	36	45	39	1	1	1	1	1	1	1	1	1	1
2.13	TRUE	Empty	Keratin 90 OS=Mus musculus OX=10090 GN=Krt90 PE=1 SV=1	E9Q1Z0	Krt90	58 kDa	TRUE	0.1	1.2	[]	unknown	26	25	30	46	33	26	32	25	18	22	0.2	0.31	1	1	0.26	0.26	0.37	0.35	0.69	0.06
35	TRUE	Empty	Carbonyl reductase [NADPH] 2 OS=Mus musculus OX=10090 GN=Cbr2 PE=1 SV=1	P08074	Cbr2	26 kDa		0.47	0.8	[]	unknown	20	20	46	21	30	8	12	54	31	29	1	1	1	1	1	1	1	1	1	1
2.14	TRUE	Empty	Keratin, type II cytoskeletal 71 OS=Mus musculus OX=10090 GN=Krt71 PE=1 SV=1	Q9R0H5	Krt71	57 kDa	TRUE	1	1	[]	unknown	0.5	0.5	0.5	0.5	0.5	0.5	0.5	0.5	0.5	0.5	0	0	0	0	0	0	0	0	0	0
34.1	TRUE	Empty	Immunoglobulin kappa variable 6-17 (Fragment) OS=Mus musculus OX=10090 GN=Igkv6-17 PE=1 SV=2	A0A140T8Q3	Igkv6-17	13 kDa	TRUE	0.023	0.5	BLM 14 low, PBS high	unknown	29	13	15	27	15	21	23	41	36	37	1	1	1	1	1	1	1	1	1	1
36	TRUE	Empty	Immunoglobulin kappa variable 1-135 (Fragment) OS=Mus musculus OX=10090 GN=Igkv1-135 PE=4 SV=1	A0A0B4J1H7	Igkv1-135	13 kDa		0.32	0.7	[]	unknown	34	14	23	35	17	20	26	41	41	20	1	1	1	1	1	1	1	1	1	1
10.5	TRUE	Empty	Immunoglobulin heavy variable V1-74 OS=Mus musculus OX=10090 GN=Ighv1-74 PE=4 SV=1	A0A075B5Y1 (+2)	Ighv1-74	13 kDa	TRUE	0.31	0.7	[]	unknown	22	26	19	33	21	27	22	15	39	48	1	1	1	1	1	1	1	1	1	1
37	TRUE	Empty	Immunoglobulin kappa variable 6-14 (Fragment) OS=Mus musculus OX=10090 GN=Igkv6-14 PE=4 SV=2	A0A140T8P1	Igkv6-14	13 kDa	TRUE	0.00063	0.6	BLM 14 low, PBS high	unknown	20	20	23	27	23	28	25	32	32	34	1	1	1	1	1	1	1	1	1	1
12.2	TRUE	Empty	Ig kappa chain V-III region PC 2880/PC 1229 OS=Mus musculus OX=10090 PE=1 SV=1	P01654		12 kDa	TRUE	0.039	0.5	BLM 14 low, PBS high	unknown	14	17	25	34	10	11	16	35	30	48	0.37	0.38	0.37	1	0.24	0.44	0.43	1	1	1
18.2	TRUE	Empty	Immunoglobulin kappa chain variable 8-30 (Fragment) OS=Mus musculus OX=10090 GN=Igkv8-30 PE=4 SV=2	A0A140T8M3	Igkv8-30	13 kDa	TRUE	0.037	0.7	BLM 14 low, PBS high	unknown	31	23	23	26	15	26	16	34	33	37	1	1	1	1	1	1	1	1	1	1
2.15	TRUE	Empty	Keratin, type II cytoskeletal 4 OS=Mus musculus OX=10090 GN=Krt4 PE=1 SV=2	P07744	Krt4	56 kDa	TRUE	1	1	[]	unknown	0.5	0.5	0.5	0.5	0.5	0.5	30	0.5	0.5	0.5	0	0	0	0	0	0	0.72	0	0	0
2.16	TRUE	Empty	Keratin, type II cytoskeletal 74 OS=Mus musculus OX=10090 GN=Krt74 PE=3 SV=1	Q6IFZ9	Krt74	55 kDa	TRUE	1	1	[]	unknown	0.5	0.5	0.5	0.5	0.5	0.5	0.5	0.5	0.5	0.5	0	0	0	0	0	0	0	0	0	0
33.1	TRUE	Empty	Histone H1.2 OS=Mus musculus OX=10090 GN=H1-2 PE=1 SV=2	P15864	H1-2	21 kDa	TRUE	0.041	0.5	BLM 14 low, PBS high	unknown	26	16	11	21	12	16	45	45	36	29	1	1	1	1	1	1	1	1	1	1
38	TRUE	Empty	Immunoglobulin kappa variable 6-15 (Fragment) OS=Mus musculus OX=10090 GN=Igkv6-15 PE=1 SV=2	A0A140T8M5	Igkv6-15	13 kDa	TRUE	0.0068	0.6	BLM 14 low, PBS high	unknown	23	18	19	28	13	21	25	32	32	39	1	1	1	1	1	1	1	1	1	1
39	TRUE	Empty	Immunoglobulin heavy variable 1-22 (Fragment) OS=Mus musculus OX=10090 GN=Ighv1-22 PE=1 SV=1	A0A075B5U7	Ighv1-22	13 kDa	TRUE	0.76	1.1	[]	unknown	23	44	21	25	19	24	20	17	25	37	0.96	0.94	0.95	0.96	0.95	0.96	0.93	0.94	0.95	0.96
40	TRUE	Empty	Alpha globin 1 OS=Mus musculus OX=10090 GN=Hba-a1 PE=1 SV=1	Q91VB8	Hba-a1	15 kDa		0.14	0.6	[]	unknown	20	16	33	12	15	17	28	45	46	25	1	1	1	1	1	1	1	1	1	1
18.3	TRUE	Empty	Immunoglobulin kappa chain variable 8-24 (Fragment) OS=Mus musculus OX=10090 GN=Igkv8-24 PE=4 SV=2	A0A140T8P5	Igkv8-24	13 kDa	TRUE	0.022	0.6	BLM 14 low, PBS high	unknown	25	17	21	25	17	22	16	34	29	38	1	1	1	1	1	1	1	1	1	1
41	TRUE	Empty	Protein-L-isoaspartate(D-aspartate) O-methyltransferase OS=Mus musculus OX=10090 GN=Pcmt1 PE=1 SV=3	PIMT_MOUSE		?		0.013	3.2	BLM 14 high, PBS low	unknown	50	31	38	31	14	13	32	17	14	6	1	1	1	1	1	1	1	1	1	1
34.2	TRUE	Empty	Ig kappa chain V19-17 OS=Mus musculus OX=10090 GN=Igk-V19-17 PE=1 SV=1	P01633	Igk-V19-17	16 kDa	TRUE	0.03	0.5	BLM 14 low, PBS high	unknown	26	11	13	25	14	19	19	32	31	35	0.6	0.6	0.6	1	0.6	0.59	0.59	0.6	0.6	1
18.4	TRUE	Empty	Immunoglobulin kappa variable 8-21 (Fragment) OS=Mus musculus OX=10090 GN=Igkv8-21 PE=1 SV=2	A0A140T8P7	Igkv8-21	13 kDa	TRUE	0.11	0.7	[]	unknown	31	18	19	27	15	22	14	31	32	31	1	1	1	1	1	1	1	1	1	1
3.3	TRUE	Empty	Ig gamma-2A chain C region, membrane-bound form OS=Mus musculus OX=10090 GN=Igh-1a PE=1 SV=3	P01865	Igh-1a	44 kDa	TRUE	0.6	0.8	[]	unknown	32	22	17	26	12	24	18	15	31	39	1	1	0.76	0.8	0.39	0.88	0.52	1	0.96	1
9.6	TRUE	Empty	Keratin, type I cytoskeletal 19 OS=Mus musculus OX=10090 GN=Krt19 PE=1 SV=1	P19001	Krt19	45 kDa	TRUE	0.35	1.3	[]	unknown	25	17	31	45	21	18	25	25	17	15	0.31	0.38	0.38	0.42	0.36	0.39	0.75	0.37	0.39	0.38
2.17	TRUE	Empty	Keratin, type II cytoskeletal 7 OS=Mus musculus OX=10090 GN=Krt7 PE=1 SV=1	Q9DCV7	Krt7	51 kDa	TRUE	0.22	1.6	[]	unknown	18	38	19	31	23	17	50	16	13	17	0.54	1	0.69	1	0.92	0.52	1	0.88	0.43	0.94
18.5	TRUE	Empty	Immunoglobulin kappa variable 8-19 OS=Mus musculus OX=10090 GN=Igkv8-19 PE=1 SV=2	A0A140T8M4	Igkv8-19	11 kDa	TRUE	0.026	0.6	BLM 14 low, PBS high	unknown	27	16	18	29	14	20	11	35	30	35	0.67	0.66	0.66	0.67	0.66	0.66	0.62	1	1	1
42.1	TRUE	Empty	Heat shock cognate 71 kDa protein OS=Mus musculus OX=10090 GN=Hspa8 PE=1 SV=1	P63017	Hspa8	71 kDa	TRUE	0.21	1.2	[]	unknown	27	21	24	19	19	38	21	23	18	21	1	1	1	1	1	1	1	1	1	1
43.1	TRUE	Empty	Histone H2B type 1-M OS=Mus musculus OX=10090 GN=H2bc14 PE=1 SV=2	P10854 (+3)	H2bc14	14 kDa	TRUE	0.31	0.9	[]	unknown	18	23	18	10	30	25	32	20	22	24	1	0.99	0.93	0.9	0.99	1	1	0.98	1	0.98
10.6	TRUE	Empty	Immunoglobulin heavy variable 1-52 OS=Mus musculus OX=10090 GN=Ighv1-52 PE=4 SV=1	A0A075B5W2 (+1)	Ighv1-52	13 kDa	TRUE	0.27	0.6	[]	unknown	21	19	14	28	19	22	17	12	37	41	1	1	0.98	1	1	1	1	0.75	1	1
44	TRUE	Empty	Immunoglobulin kappa variable 6-32 (Fragment) OS=Mus musculus OX=10090 GN=Igkv6-32 PE=4 SV=2	A0A140T8N9	Igkv6-32	13 kDa	TRUE	0.1	0.5	[]	unknown	28	11	11	20	14	15	13	30	37	25	1	1	1	1	1	1	1	1	1	1
43.2	TRUE	Empty	Histone H2B type 1-F/J/L OS=Mus musculus OX=10090 GN=H2bc7 PE=1 SV=2	P10853 (+3)	H2bc7	14 kDa	TRUE	0.39	0.9	[]	unknown	17	23	18	10	30	21	33	19	21	26	1	1	0.93	0.9	0.98	1	1	0.92	0.97	1
45	TRUE	Empty	Immunoglobulin kappa chain variable 13-84 (Fragment) OS=Mus musculus OX=10090 GN=Igkv13-84 PE=4 SV=2	A0A140T8N3	Igkv13-84	13 kDa	TRUE	0.032	0.3	BLM 14 low, PBS high	unknown	19	7	12	19	13	15	13	26	53	42	1	1	1	1	1	1	1	1	1	1
48	TRUE	Empty	Elongation factor 1-alpha 1 OS=Mus musculus OX=10090 GN=Eef1a1 PE=1 SV=3	P10126	Eef1a1	50 kDa	TRUE	0.046	2.6	BLM 14 high, PBS low	unknown	22	30	44	25	28	14	23	9	11	17	1	1	1	1	1	1	1	1	1	1
10.7	TRUE	Empty	Immunoglobulin heavy variable 1-53 (Fragment) OS=Mus musculus OX=10090 GN=Ighv1-53 PE=4 SV=1	A0A075B5W3	Ighv1-53	13 kDa	TRUE	0.2	0.6	[]	unknown	19	17	14	27	0.5	21	19	13	36	41	0.56	0.25	0.24	0.28	0	0.3	0.75	0.29	1	0.6
49	TRUE	Empty	60S ribosomal protein L12 OS=Mus musculus OX=10090 GN=Rpl12 PE=1 SV=2	P35979	Rpl12	18 kDa		0.019	1.9	BLM 14 high, PBS low	unknown	26	30	31	22	19	11	24	13	22	12	1	1	1	1	1	1	1	1	1	1
10.8	TRUE	Empty	Immunoglobulin heavy variable 1-64 (Fragment) OS=Mus musculus OX=10090 GN=Ighv1-64 PE=4 SV=1	A0A075B5X3	Ighv1-64	13 kDa	TRUE	0.21	0.6	[]	unknown	19	17	14	28	0.5	21	19	13	34	41	0.56	0.25	0.24	1	0	0.3	0.75	0.29	0.57	0.6
51	TRUE	Empty	Immunoglobulin heavy variable 1-62-2 OS=Mus musculus OX=10090 GN=Ighv1-62-2 PE=4 SV=1	A0A075B680 (+2)	Ighv1-62-2	11 kDa	TRUE	0.78	0.9	[]	unknown	35	22	19	22	10	16	12	22	21	40	1	1	1	1	1	1	1	1	1	1
47.1	TRUE	Empty	Glyceraldehyde-3-phosphate dehydrogenase OS=Mus musculus OX=10090 GN=Gapdh PE=1 SV=1	A0A0A0MQF6 (+1)	Gapdh	39 kDa	TRUE	0.066	1.8	[]	unknown	27	27	42	28	16	12	14	14	16	23	1	1	1	1	1	0.99	0.99	0.98	0.98	1
10.9	TRUE	Empty	Immunoglobulin heavy variable V1-12 OS=Mus musculus OX=10090 GN=Ighv1-12 PE=4 SV=1	A0A075B5U0 (+1)	Ighv1-12	11 kDa	TRUE	0.68	0.8	[]	unknown	19	20	15	27	17	21	18	0.5	28	42	1	0.08	0.08	0.09	0.09	0.09	0.08	0	0.09	1
10.1	TRUE	Empty	Immunoglobulin heavy variable V1-19 OS=Mus musculus OX=10090 GN=Ighv1-19 PE=1 SV=1	A0A075B5U5 (+1)	Ighv1-19	13 kDa	TRUE	0.13	0.02	[]	unknown	0.5	0.5	0.5	0.5	0.5	0.5	0.5	0.5	29	40	0	0	0	0	0	0	0	0	0.86	0.08
9.7	TRUE	Empty	Keratin, type I cytoskeletal 42 OS=Mus musculus OX=10090 GN=Krt42 PE=1 SV=1	Q6IFX2	Krt42	50 kDa	TRUE	0.63	1.3	[]	unknown	11	16	38	38	14	17	25	26	14	10	1	1	1	1	1	1	1	1	1	1
26.2	TRUE	Empty	Tubulin alpha chain (Fragment) OS=Mus musculus OX=10090 GN=Tuba4a PE=1 SV=1	A0A0A0MQA5 (+1)	Tuba4a	53 kDa	TRUE	0.037	2	BLM 14 high, PBS low	unknown	33	21	30	26	21	25	19	8	15	18	1	1	1	1	1	1	1	0.96	1	1
46.1	TRUE	Empty	Immunoglobulin kappa variable 5-39 OS=Mus musculus OX=10090 GN=Igkv5-39 PE=1 SV=7	A0A075B5M7	Igkv5-39	10 kDa	TRUE	0.12	0.6	[]	unknown	27	19	12	14	14	10	11	27	28	43	1	1	1	1	1	1	1	1	1	1
53	TRUE	Empty	ADP/ATP translocase 2 OS=Mus musculus OX=10090 GN=Slc25a5 PE=1 SV=3	P51881	Slc25a5	33 kDa	TRUE	0.85	1	[]	unknown	27	23	19	20	19	13	20	27	21	19	1	1	1	1	1	1	1	1	1	1
12.3	TRUE	Empty	Ig kappa chain V-III region PC 3741/TEPC 111 OS=Mus musculus OX=10090 PE=1 SV=1	P01660		12 kDa	TRUE	0.057	0.3	[]	unknown	13	14	0.5	24	0.5	0.5	9	24	20	37	1	1	0	1	0	0	1	1	1	1
12.4	TRUE	Empty	Ig kappa chain V-III region PC 2413 OS=Mus musculus OX=10090 PE=1 SV=1	P01657		12 kDa	TRUE	0.091	0.6	[]	unknown	15	13	17	24	0.5	0.5	10	26	17	32	0.19	0.2	0.18	0.23	0	0	0.24	0.22	0.99	0.22
54.1	TRUE	Empty	Immunoglobulin heavy variable 4-1 (Fragment) OS=Mus musculus OX=10090 GN=Ighv4-1 PE=1 SV=7	A0A075B5R5	Ighv4-1	13 kDa	TRUE	0.26	1.3	[]	unknown	17	16	26	21	13	30	28	12	16	17	1	1	1	1	1	1	1	1	1	1
19.2	TRUE	Empty	Immunoglobulin heavy variable 1-82 OS=Mus musculus OX=10090 GN=Ighv1-82 PE=1 SV=1	A0A0B4J1J7 (+1)	Ighv1-82	11 kDa	TRUE	0.72	0.9	[]	unknown	32	14	14	19	14	19	16	19	19	30	1	1	1	1	1	1	1	1	1	1
15.4	TRUE	Empty	Tubulin beta-6 chain OS=Mus musculus OX=10090 GN=Tubb6 PE=1 SV=1	Q922F4	Tubb6	50 kDa	TRUE	0.018	3.1	BLM 14 high, PBS low	unknown	25	26	27	32	21	21	11	0.5	9	16	0.9	0.96	1	0.92	0.69	0.85	0.75	0	0.74	0.86
2.18	TRUE	Empty	Keratin, type II cytoskeletal 72 OS=Mus musculus OX=10090 GN=Krt72 PE=3 SV=1	Q6IME9	Krt72	57 kDa	TRUE	0.2	1.3	[]	unknown	18	17	22	31	26	15	18	19	12	14	1	1	1	1	1	1	1	1	1	0.99
56	TRUE	Empty	Stress-70 protein, mitochondrial OS=Mus musculus OX=10090 GN=Hspa9 PE=1 SV=3	P38647	Hspa9	73 kDa	TRUE	0.07	1.1	[]	unknown	19	17	18	17	22	30	15	17	16	15	1	1	1	1	1	1	1	1	1	1
52.1	TRUE	Empty	Immunoglobulin kappa variable 12-44 (Fragment) OS=Mus musculus OX=10090 GN=Igkv12-44 PE=4 SV=2	A0A140T8M2	Igkv12-44	13 kDa	TRUE	0.09	0.7	[]	unknown	21	16	12	23	15	12	17	20	30	25	1	0.99	1	1	0.99	0.99	1	1	1	1
12.5	TRUE	Empty	Ig kappa chain V-V region MOPC 21 OS=Mus musculus OX=10090 PE=1 SV=1	P01634		15 kDa	TRUE	0.022	0.5	BLM 14 low, PBS high	unknown	19	9	9	15	7	7	15	23	31	27	0.94	0.94	0.82	0.9	0.7	0.8	0.85	0.98	0.91	0.93
10.11	TRUE	Empty	Ig heavy chain V region TEPC 1017 OS=Mus musculus OX=10090 PE=4 SV=1	P03980		16 kDa	TRUE	0.37	0.04	[]	unknown	0.5	0.5	0.5	0.5	0.5	0.5	0.5	0.5	0.5	36	0	0	0	0	0	0	0	0	0	0.96
19.3	TRUE	Empty	Immunoglobulin heavy variable 1-77 OS=Mus musculus OX=10090 GN=Ighv1-77 PE=1 SV=1	A0A0B4J1M0	Ighv1-77	11 kDa	TRUE	0.71	0.9	[]	unknown	28	13	13	26	10	14	18	15	18	29	1	1	1	1	1	1	1	1	1	1
58	TRUE	Empty	Immunoglobulin heavy variable 1-15 (Fragment) OS=Mus musculus OX=10090 GN=Ighv1-15 PE=4 SV=1	A0A0A6YXA5	Ighv1-15	13 kDa	TRUE	0.91	1.1	[]	unknown	15	34	13	19	8	17	15	11	21	27	1	1	1	1	0.87	1	1	1	1	1
33.2	TRUE	Empty	Histone H1.4 OS=Mus musculus OX=10090 GN=H1-4 PE=1 SV=2	P43274	H1-4	22 kDa	TRUE	0.059	0.5	[]	unknown	20	14	5	17	7	9	27	26	25	23	1	0.99	0.74	0.98	0.79	0.81	1	0.89	0.89	0.98
12.6	TRUE	Empty	Ig kappa chain V-III region PC 7175 OS=Mus musculus OX=10090 PE=1 SV=1	P01671		12 kDa	TRUE	0.14	0.6	[]	unknown	11	12	15	23	0.5	10	9	20	15	32	0.53	1	1	1	0	0.67	1	0.97	1	1
21.1	TRUE	Empty	14-3-3 protein zeta/delta OS=Mus musculus OX=10090 GN=Ywhaz PE=1 SV=1	P63101	Ywhaz	28 kDa	TRUE	0.76	1.1	[]	unknown	23	16	29	17	16	9	11	25	28	8	1	1	1	1	1	1	1	1	1	1
20.3	TRUE	Empty	Ig kappa chain V-V region MOPC 173 OS=Mus musculus OX=10090 PE=1 SV=1	P01643		12 kDa	TRUE	0.24	0.7	[]	unknown	15	26	17	19	6	3	16	30	29	19	1	1	1	1	1	0.62	1	1	1	1
59	TRUE	Empty	E3 ubiquitin-protein ligase TRIM21 OS=Mus musculus OX=10090 GN=Trim21 PE=1 SV=1	Q3U7K7	Trim21	53 kDa		0.0079	3.5	BLM 14 high, PBS low	unknown	22	19	20	33	32	13	23	0.5	10	7	1	1	1	1	1	1	1	0	1	1
60	TRUE	Empty	Immunoglobulin kappa variable 14-111 (Fragment) OS=Mus musculus OX=10090 GN=Igkv14-111 PE=4 SV=2	A0A140T8P9 (+1)	Igkv14-111	13 kDa	TRUE	0.038	0.5	BLM 14 low, PBS high	unknown	17	10	14	18	7	13	10	19	30	28	1	1	1	1	0.94	0.95	0.99	1	1	1
47.2	TRUE	Empty	Glyceraldehyde-3-phosphate dehydrogenase OS=Mus musculus OX=10090 GN=Gm10358 PE=1 SV=1	A0A1D5RLD8	Gm10358	36 kDa	TRUE	0.096	1.5	[]	unknown	21	20	29	22	12	11	13	13	13	20	0.99	0.99	1	1	0.99	0.97	0.97	0.97	0.98	0.99
61	TRUE	Empty	Fibulin-5 OS=Mus musculus OX=10090 GN=Fbln5 PE=1 SV=1	Q9WVH9	Fbln5	50 kDa		0.93	1	[]	unknown	22	10	13	11	25	19	22	14	15	15	1	1	1	1	1	1	1	1	1	1
11.4	TRUE	Empty	Beta-actin-like protein 2 OS=Mus musculus OX=10090 GN=Actbl2 PE=1 SV=1	Q8BFZ3	Actbl2	42 kDa	TRUE	0.37	35	[]	unknown	0.5	51	0.5	0.5	0.5	0.5	54	0.5	0.5	0.5	0	0.07	0	0	0	0	0.12	0	0	0
20.4	TRUE	Empty	Immunoglobulin kappa variable 10-95 OS=Mus musculus OX=10090 GN=Igkv10-95 PE=4 SV=7	A0A075B5L0	Igkv10-95	10 kDa	TRUE	0.18	0.7	[]	unknown	14	25	12	16	8	5	14	26	25	21	0.62	0.62	1	0.61	0.6	0.62	0.61	0.6	0.62	0.62
57.1	TRUE	Empty	Ig kappa chain V-II region 26-10 OS=Mus musculus OX=10090 PE=1 SV=1	P01631		12 kDa	TRUE	0.0049	0.4	BLM 14 low, PBS high	unknown	8	9	14	10	11	12	14	25	23	30	0.97	1	0.99	1	0.99	0.98	1	1	1	1
29.2	TRUE	Empty	Ig lambda-3 chain C region (Fragment) OS=Mus musculus OX=10090 GN=Iglc3 PE=1 SV=1	A0A0G2JGQ8 (+1)	Iglc3	11 kDa	TRUE	0.19	0.5	[]	unknown	11	16	9	19	3	12	23	18	16	41	0.56	1	0.57	0.53	0.15	0.57	1	0.57	0.53	0.57
2.19	TRUE	Empty	Keratin, type II cuticular Hb4 OS=Mus musculus OX=10090 GN=Krt84 PE=2 SV=2	Q99M73	Krt84	65 kDa	TRUE	1	1	[]	unknown	0.5	0.5	0.5	0.5	0.5	0.5	0.5	0.5	0.5	0.5	0	0	0	0	0	0	0	0	0	0
62	TRUE	Empty	Immunoglobulin kappa chain variable 9-124 OS=Mus musculus OX=10090 GN=Igkv9-124 PE=1 SV=7	A0A075B5K2	Igkv9-124	10 kDa	TRUE	0.14	0.6	[]	unknown	13	25	9	21	4	4	13	28	27	21	1	1	1	1	1	1	1	1	1	1
12.7	TRUE	Empty	Ig kappa chain V-III region PC 7940 OS=Mus musculus OX=10090 PE=1 SV=1	P01672		12 kDa	TRUE	0.37	11	[]	unknown	0.5	0.5	15	0.5	0.5	10	0.5	0.5	0.5	0.5	0	0	0.85	0	0	0.07	0	0	0	0
63	TRUE	Empty	40S ribosomal protein S11 OS=Mus musculus OX=10090 GN=Rps11 PE=1 SV=3	P62281	Rps11	18 kDa		0.086	1.5	[]	unknown	24	17	16	17	17	15	20	11	15	12	1	1	1	1	1	1	1	1	1	1
19.4	TRUE	Empty	Immunoglobulin heavy variable 1-78 OS=Mus musculus OX=10090 GN=Ighv1-78 PE=1 SV=1	A0A075B674	Ighv1-78	11 kDa	TRUE	0.9	1.1	[]	unknown	35	13	0.5	16	0.5	0.5	12	0.5	14	29	1	1	0	0.99	0	0	0.46	0	1	1
64	TRUE	Empty	Immunoglobulin heavy constant mu (Fragment) OS=Mus musculus OX=10090 GN=Ighm PE=1 SV=1	A0A075B5P6 (+2)	Ighm	50 kDa		0.68	0.9	[]	unknown	14	12	12	21	15	28	10	14	8	21	1	1	1	1	1	1	1	1	1	1
65	TRUE	Empty	Ig kappa chain V-VI region XRPC 44 OS=Mus musculus OX=10090 PE=1 SV=1	P01675 (+3)		12 kDa	TRUE	0.69	1.1	[]	unknown	23	10	19	20	9	14	15	14	16	17	1	1	1	1	1	1	1	1	1	1
66	TRUE	Empty	Immunoglobulin heavy variable V1-7 (Fragment) OS=Mus musculus OX=10090 GN=Ighv1-7 PE=4 SV=1	A0A075B5T7	Ighv1-7	13 kDa	TRUE	0.69	0.9	[]	unknown	27	12	12	15	0.5	0.5	0.5	15	17	27	0.31	0.07	0.07	0.07	0	0	0	0.09	0.35	1
67	TRUE	Empty	Four and a half LIM domains protein 1 OS=Mus musculus OX=10090 GN=Fhl1 PE=1 SV=3	FHL1_MOUSE		?		0.68	0.9	[]	unknown	22	6	20	11	25	5	9	21	17	17	1	1	1	1	1	1	1	1	1	1
21.2	TRUE	Empty	Isoform 2 of 14-3-3 protein theta OS=Mus musculus OX=10090 GN=Ywhaq	1433T_MOUSE		?	TRUE	0.42	1.2	[]	unknown	20	18	19	16	15	10	7	17	21	11	1	1	1	1	1	1	1	1	1	1
68	TRUE	Empty	Ig kappa chain V-III region PC 2154 OS=Mus musculus OX=10090 PE=1 SV=1	P01674		12 kDa	TRUE	0.075	0.5	[]	unknown	12	7	7	19	7	12	7	15	13	23	0.99	0.99	0.99	1	0.99	1	0.99	0.99	1	0.99
71	TRUE	Empty	Immunoglobulin kappa chain variable 9-120 (Fragment) OS=Mus musculus OX=10090 GN=Igkv9-120 PE=1 SV=2	A0A140T8N0 (+1)	Igkv9-120	13 kDa	TRUE	0.05	0.7	[]	unknown	17	16	10	19	5	3	11	22	22	19	1	1	1	1	1	1	1	1	1	1
74	TRUE	Empty	Protease, serine 1 (trypsin 1) OS=Mus musculus OX=10090 GN=Prss1 PE=1 SV=1	Q9Z1R9	Prss1	26 kDa	TRUE	0.37	0.09	[]	unknown	0.5	0.5	0.5	0.5	0.5	0.5	0.5	0.5	0.5	16	0	0	0	0	0	0	0	0	0	1
72	TRUE	Empty	ADP/ATP translocase 1 OS=Mus musculus OX=10090 GN=Slc25a4 PE=1 SV=4	P48962	Slc25a4	33 kDa	TRUE	0.51	1.1	[]	unknown	19	16	17	13	16	8	15	20	15	11	1	1	1	1	1	0.94	1	1	1	0.93
2.2	TRUE	Empty	Keratin 78 OS=Mus musculus OX=10090 GN=Krt78 PE=1 SV=1	E9Q0F0	Krt78	112 kDa	TRUE	0.92	1	[]	unknown	12	10	19	25	14	13	13	15	14	11	1	1	1	1	1	1	1	1	1	1
75	TRUE	Empty	ERO1-like protein alpha OS=Mus musculus OX=10090 GN=Ero1a PE=1 SV=2	Q8R180	Ero1a	54 kDa		0.57	1.2	[]	unknown	20	15	18	10	16	21	0.5	22	14	10	1	1	1	1	1	1	0	1	1	1
76.1	TRUE	Empty	40S ribosomal protein S19 OS=Mus musculus OX=10090 GN=Rps19 PE=1 SV=3	Q9CZX8	Rps19	16 kDa	TRUE	0.28	1.2	[]	unknown	16	16	18	14	11	17	11	18	13	9	1	1	1	1	1	1	1	1	1	1
42.2	TRUE	Empty	Heat shock-related 70 kDa protein 2 OS=Mus musculus OX=10090 GN=Hspa2 PE=1 SV=2	P17156	Hspa2	70 kDa	TRUE	1	1	[]	unknown	17	12	0.5	0.5	12	24	12	16	0.5	13	0.3	0.3	0	0	0.29	0.33	0.31	0.37	0	0.07
77	TRUE	Empty	Endoplasmic reticulum chaperone BiP OS=Mus musculus OX=10090 GN=Hspa5 PE=1 SV=3	P20029	Hspa5	72 kDa	TRUE	0.14	2.5	[]	unknown	27	11	13	13	12	31	13	11	3	6	1	1	1	1	1	1	1	1	0.98	1
78	TRUE	Empty	Ig heavy chain V region 186-1 OS=Mus musculus OX=10090 PE=4 SV=2	P01753 (+1)		13 kDa	TRUE	0.76	0.9	[]	unknown	16	10	15	17	9	20	8	4	22	21	1	1	1	1	1	1	1	0.97	1	1
9.8	TRUE	Empty	Keratin, type I cytoskeletal 18 OS=Mus musculus OX=10090 GN=Krt18 PE=1 SV=5	P05784	Krt18	48 kDa	TRUE	0.33	1.2	[]	unknown	13	11	15	28	9	12	23	14	10	8	0.75	0.99	0.75	0.75	0.74	0.73	1	0.74	0.74	0.75
19.5	TRUE	Empty	Immunoglobulin heavy variable V1-54 (Fragment) OS=Mus musculus OX=10090 GN=Ighv1-54 PE=4 SV=1	A0A075B5W5	Ighv1-54	13 kDa	TRUE	0.69	1.9	[]	unknown	25	0.5	0.5	0.5	0.5	0.5	0.5	0.5	13	0.5	1	0	0	0	0	0	0	0	1	0
80	TRUE	Empty	60S ribosomal protein L30 OS=Mus musculus OX=10090 GN=Rpl30 PE=1 SV=2	P62889	Rpl30	13 kDa		0.06	1.2	[]	unknown	16	16	13	13	13	10	23	11	13	12	1	1	1	1	1	1	1	1	1	1
79	TRUE	Empty	High affinity immunoglobulin gamma Fc receptor I OS=Mus musculus OX=10090 GN=Fcgr1 PE=1 SV=1	P26151	Fcgr1	45 kDa		< 0.00010	23	BLM 14 high, PBS low	unknown	23	21	25	16	13	19	17	0.5	0.5	2	1	1	1	1	1	1	1	0	0	1
81	TRUE	Empty	Peroxiredoxin-1 (Fragment) OS=Mus musculus OX=10090 GN=Prdx1 PE=1 SV=8	B1AXW5 (+1)	Prdx1	19 kDa	TRUE	0.28	1.5	[]	unknown	21	12	24	10	13	8	12	19	12	8	1	1	1	1	1	1	1	1	1	1
69.1	TRUE	Empty	H-2 class I histocompatibility antigen, D-B alpha chain OS=Mus musculus OX=10090 GN=H2-D1 PE=1 SV=2	P01899	H2-D1	41 kDa	TRUE	0.61	1.1	[]	unknown	17	12	12	15	31	10	0.5	10	9	17	1	1	1	1	1	1	0	1	1	1
82	TRUE	Empty	40S ribosomal protein S16 OS=Mus musculus OX=10090 GN=Rps16 PE=1 SV=4	P14131	Rps16	16 kDa		0.19	1.3	[]	unknown	16	15	12	13	12	9	17	9	14	11	1	1	1	1	1	1	1	1	1	1
83	TRUE	Empty	AP-2 complex subunit mu OS=Mus musculus OX=10090 GN=Ap2m1 PE=1 SV=1	P84091 (+1)	Ap2m1	50 kDa		0.054	5	[]	unknown	9	21	27	23	20	10	2	0.5	4	7	1	1	1	1	1	1	1	0	1	1
84	TRUE	Empty	Caveolae-associated protein 1 OS=Mus musculus OX=10090 GN=Cavin1 PE=1 SV=1	O54724	Cavin1	44 kDa	TRUE	0.26	0.8	[]	unknown	12	9	12	10	21	8	12	10	18	15	1	1	1	1	1	1	1	1	1	1
85	TRUE	Empty	Complement C1q subcomponent subunit C OS=Mus musculus OX=10090 GN=C1qc PE=1 SV=2	Q02105	C1qc	26 kDa		0.1	1.4	[]	unknown	22	15	15	21	5	6	9	11	14	11	1	1	1	1	1	1	1	1	1	1
21.3	TRUE	Empty	14-3-3 protein gamma OS=Mus musculus OX=10090 GN=Ywhag PE=1 SV=2	P61982	Ywhag	28 kDa	TRUE	0.27	1.4	[]	unknown	16	12	25	11	9	8	8	13	14	11	1	1	1	1	1	0.45	1	1	1	1
86	TRUE	Empty	Ig kappa chain V-V region K2 (Fragment) OS=Mus musculus OX=10090 PE=1 SV=1	P01635		13 kDa	TRUE	0.14	0.7	[]	unknown	12	14	9	17	6	6	10	20	12	20	1	1	1	1	0.83	0.83	1	1	1	1
87	TRUE	Empty	Immunoglobulin kappa chain variable 4-61 OS=Mus musculus OX=10090 GN=Igkv4-61 PE=4 SV=7	A0A075B5M2	Igkv4-61	10 kDa	TRUE	0.44	0.5	[]	unknown	17	6	0.5	12	0.5	15	7	0.5	27	20	1	1	0	1	0	1	1	0	1	1
88	TRUE	Empty	60S ribosomal protein L28 OS=Mus musculus OX=10090 GN=Rpl28 PE=1 SV=2	P41105	Rpl28	16 kDa		0.29	1.3	[]	unknown	15	9	12	13	8	11	23	9	12	6	1	1	1	1	1	1	1	1	1	1
50.1	TRUE	Empty	Immunoglobulin heavy variable 6-3 (Fragment) OS=Mus musculus OX=10090 GN=Ighv6-3 PE=4 SV=7	A0A075B5T2	Ighv6-3	13 kDa	TRUE	0.4	0.9	[]	unknown	15	13	14	15	6	5	6	13	21	15	1	1	1	1	1	1	1	1	1	1
89	TRUE	Empty	Ig heavy chain V region 3-6 OS=Mus musculus OX=10090 GN=Ighv3-6 PE=1 SV=1	P18531	Ighv3-6	13 kDa	TRUE	0.37	0.8	[]	unknown	10	6	11	20	14	7	15	10	9	17	1	1	1	1	1	1	1	0.99	1	1
90	TRUE	Empty	Immunoglobulin kappa variable 8-16 OS=Mus musculus OX=10090 GN=Igkv8-16 PE=4 SV=7	A0A075B5N6 (+2)	Igkv8-16	13 kDa	TRUE	0.026	0.3	BLM 14 low, PBS high	unknown	4	9	8	6	5	0.5	10	16	22	31	0.9	0.9	0.8	0.83	0.82	0	0.84	1	1	1
12.8	TRUE	Empty	Ig kappa chain V-III region ABPC 22/PC 9245 OS=Mus musculus OX=10090 PE=1 SV=1	P01662 (+1)		12 kDa	TRUE	0.15	0.06	[]	unknown	0.5	0.5	0.5	0.5	0.5	9	0.5	15	8	0.5	0	0	0	0	0	0.06	0	1	0.34	0
55.1	TRUE	Empty	Immunoglobulin kappa variable 4-55 (Fragment) OS=Mus musculus OX=10090 GN=Igkv4-55 PE=1 SV=1	A0A0B4J1I9	Igkv4-55	13 kDa	TRUE	0.1	0.5	[]	unknown	10	7	14	14	6	7	8	14	26	17	1	1	1	1	1	0.95	1	1	1	1
91	TRUE	Empty	60S ribosomal protein L38 OS=Mus musculus OX=10090 GN=Rpl38 PE=1 SV=3	Q9JJI8	Rpl38	8 kDa		0.41	0.8	[]	unknown	10	6	12	7	8	18	23	13	14	8	1	1	1	1	1	1	1	1	1	1
25.1	TRUE	Empty	Ig heavy chain V region 6.96 OS=Mus musculus OX=10090 PE=4 SV=1	P18528		11 kDa	TRUE	0.24	0.6	[]	unknown	13	10	7	12	8	11	10	9	23	16	1	1	1	1	1	1	1	1	1	1
92	TRUE	Empty	Immunoglobulin kappa variable 3-1 (Fragment) OS=Mus musculus OX=10090 GN=Igkv3-1 PE=1 SV=7	A0A075B5P1	Igkv3-1	13 kDa	TRUE	0.71	0.6	[]	unknown	11	0.5	0.5	0.5	0.5	0.5	0.5	0.5	0.5	20	0.99	0	0	0	0	0	0	0	0	0.99
93	TRUE	Empty	Immunoglobulin heavy variable V8-12 (Fragment) OS=Mus musculus OX=10090 GN=Ighv8-12 PE=4 SV=1	A0A0G2JDE1	Ighv8-12	13 kDa	TRUE	0.11	0.6	[]	unknown	11	6	8	9	10	10	8	10	15	20	1	1	1	1	1	1	1	1	1	1
21.4	TRUE	Empty	14-3-3 protein beta/alpha OS=Mus musculus OX=10090 GN=Ywhab PE=1 SV=3	1433B_MOUSE		?	TRUE	0.22	1.5	[]	unknown	15	11	22	13	11	10	6	12	13	6	1	1	1	1	1	1	1	1	1	0.96
12.9	TRUE	Empty	Immunoglobulin kappa chain variable 6-29 OS=Mus musculus OX=10090 GN=Igkv6-29 PE=4 SV=7	A0A075B5N2 (+1)	Igkv6-29	13 kDa	TRUE	0.0011	0.2	BLM 14 low, PBS high	unknown	10	4	4	11	0.5	0.5	6	23	26	24	0.94	1	1	1	0	0	0.92	1	1	1
70.1	TRUE	Empty	Myosin-9 OS=Mus musculus OX=10090 GN=Myh9 PE=1 SV=4	Q8VDD5	Myh9	226 kDa	TRUE	0.26	30	[]	unknown	8	36	0.5	0.5	0.5	0.5	69	0.5	0.5	0.5	1	1	0	0	0	0	1	0	0	0
94	TRUE	Empty	Immunoglobulin heavy variable 1-76 OS=Mus musculus OX=10090 GN=Ighv1-76 PE=1 SV=1	A0A0B4J1N0 (+1)	Ighv1-76	11 kDa		0.29	1.2	[]	unknown	15	16	11	12	6	9	13	13	12	11	1	1	1	1	1	1	1	1	1	1
2.21	TRUE	Empty	Desmin OS=Mus musculus OX=10090 GN=Des PE=1 SV=3	P31001	Des	53 kDa	TRUE	0.075	27	[]	unknown	9	24	7	13	6	10	45	0.5	0.5	0.5	0.58	1	0.75	1	0.79	0.61	1	0	0	0
95	TRUE	Empty	60S ribosomal protein L23 OS=Mus musculus OX=10090 GN=Rpl23 PE=1 SV=1	P62830	Rpl23	15 kDa		0.49	1.1	[]	unknown	16	11	13	9	8	7	16	11	11	14	1	1	1	1	1	1	1	1	1	1
96.1	TRUE	Empty	Myosin light polypeptide 6 OS=Mus musculus OX=10090 GN=Myl6 PE=1 SV=1	A0A1W2P6F6 (+2)	Myl6	17 kDa	TRUE	0.23	2	[]	unknown	14	16	4	7	3	8	46	8	6	3	1	1	1	1	1	1	1	1	1	1
25.2	TRUE	Empty	Immunoglobulin heavy variable 5-12 (Fragment) OS=Mus musculus OX=10090 GN=Ighv5-12 PE=4 SV=1	A0A075B5Q4	Ighv5-12	13 kDa	TRUE	0.11	0.7	[]	unknown	8	12	9	12	10	12	10	12	12	16	1	1	0.99	1	1	0.97	1	1	1	1
50.2	TRUE	Empty	Immunoglobulin heavy variable 6-6 (Fragment) OS=Mus musculus OX=10090 GN=Ighv6-6 PE=4 SV=1	A0A075B5T3	Ighv6-6	13 kDa	TRUE	0.67	0.9	[]	unknown	16	10	11	10	2	10	11	10	20	12	1	1	1	1	0.99	1	1	1	1	1
97	TRUE	Empty	Histone H1.5 OS=Mus musculus OX=10090 GN=H1-5 PE=1 SV=2	P43276	H1-5	23 kDa	TRUE	0.1	0.5	[]	unknown	12	11	0.5	8	3	3	16	18	16	14	1	1	0	1	0.59	1	1	1	1	1
98	TRUE	Empty	Histone H4 OS=Mus musculus OX=10090 GN=H4c1 PE=1 SV=2	P62806	H4c1	11 kDa		0.26	0.7	[]	unknown	7	13	7	5	7	12	16	18	15	8	1	1	1	1	1	1	1	1	1	1
46.2	TRUE	Empty	Immunoglobulin kappa chain variable 5-43 (Fragment) OS=Mus musculus OX=10090 GN=Igkv5-43 PE=1 SV=1	A0A0B4J1J2	Igkv5-43	13 kDa	TRUE	0.15	0.7	[]	unknown	12	7	12	7	0.5	10	7	12	14	18	1	1	1	1	0	1	1	1	1	1
76.2	TRUE	Empty	40S ribosomal protein S19 OS=Mus musculus OX=10090 GN=Rps19 PE=1 SV=1	D3Z722	Rps19	23 kDa	TRUE	0.92	0.9	[]	unknown	13	0.5	0.5	10	0.5	0.5	0.5	15	0.5	0.5	0.06	0	0	0.06	0	0	0	0.06	0	0
25.3	TRUE	Empty	Immunoglobulin heavy variable 5-17 (Fragment) OS=Mus musculus OX=10090 GN=Ighv5-17 PE=1 SV=1	A0A075B5R1	Ighv5-17	13 kDa	TRUE	0.24	0.7	[]	unknown	13	10	7	9	7	9	9	9	20	16	1	1	1	1	1	1	1	1	1	1
25.4	TRUE	Empty	Immunoglobulin heavy variable 5-9-1 OS=Mus musculus OX=10090 GN=Ighv5-9-1 PE=1 SV=1	A0A075B5Q6 (+1)	Ighv5-9-1	13 kDa	TRUE	0.8	1	[]	unknown	11	14	12	5	4	11	9	11	14	13	1	1	1	1	1	1	1	1	1	1
99	TRUE	Empty	Immunoglobulin kappa variable 4-63 OS=Mus musculus OX=10090 GN=Igkv4-63 PE=1 SV=1	A0A075B5M1	Igkv4-63	10 kDa	TRUE	0.42	0.6	[]	unknown	15	2	0.5	14	17	12	9	9	14	8	1	1	0	1	1	1	1	1	1	1
21.5	TRUE	Empty	14-3-3 protein epsilon OS=Mus musculus OX=10090 GN=Ywhae PE=1 SV=1	P62259	Ywhae	29 kDa	TRUE	0.31	1.7	[]	unknown	17	7	24	9	11	5	5	9	14	6	1	1	1	1	1	0.09	1	1	1	1
21.6	TRUE	Empty	14-3-3 protein eta OS=Mus musculus OX=10090 GN=Ywhah PE=1 SV=2	P68510	Ywhah	28 kDa	TRUE	0.56	1.2	[]	unknown	15	9	17	10	8	8	6	13	15	6	1	1	1	1	1	0.59	1	1	1	1
2.22	TRUE	Empty	Neurofilament heavy polypeptide OS=Mus musculus OX=10090 GN=Nefh PE=1 SV=3	P19246	Nefh	117 kDa	TRUE	0.37	0.2	[]	unknown	0.5	0.5	0.5	0.5	0.5	0.5	0.5	0.5	0.5	7	0	0	0	0	0	0	0	0	0	0.19
101	TRUE	Empty	Immunoglobulin heavy variable 1-47 OS=Mus musculus OX=10090 GN=Ighv1-47 PE=4 SV=1	A0A075B5V8 (+1)	Ighv1-47	11 kDa		0.86	1.1	[]	unknown	8	11	4	15	6	22	15	0.5	6	14	1	1	1	1	1	1	1	0	1	1
57.2	TRUE	Empty	Immunoglobulin kappa chain variable 1-122 (Fragment) OS=Mus musculus OX=10090 GN=Igkv1-122 PE=4 SV=2	A0A140T8M9	Igkv1-122	13 kDa	TRUE	0.0028	0.4	BLM 14 low, PBS high	unknown	6	7	8	0.5	0.5	0.5	0.5	19	16	22	0.97	0.97	0.95	0	0	0	0	0.95	0.96	0.98
104	TRUE	Empty	TFG protein OS=Mus musculus OX=10090 GN=Tfg PE=1 SV=1	Q9Z1A1	Tfg	43 kDa		0.065	2.6	[]	unknown	18	11	8	17	17	8	6	4	6	4	1	1	1	1	1	1	1	1	1	1
103	TRUE	Empty	Ig kappa chain V-V region L7 (Fragment) OS=Mus musculus OX=10090 GN=Gm10881 PE=1 SV=1	P01642	Gm10881	13 kDa		0.15	0.4	[]	unknown	8	8	4	10	6	12	7	10	26	12	1	1	1	1	1	1	1	1	1	1
2.23	TRUE	Empty	Predicted gene 5414 OS=Mus musculus OX=10090 GN=Gm5414 PE=1 SV=1	Q6IFZ8	Gm5414	60 kDa	TRUE	0.66	0.7	[]	unknown	0.5	13	0.5	18	0.5	0.5	8	10	0.5	11	0	0.49	0	0.54	0	0	0.51	0.07	0	0.06
76.3	TRUE	Empty	40S ribosomal protein S19 (Fragment) OS=Mus musculus OX=10090 GN=Rps19 PE=1 SV=8	D3YUG3	Rps19	15 kDa	TRUE	1	1	[]	unknown	0.5	0.5	0.5	0.5	0.5	12	0.5	0.5	0.5	0.5	0	0	0	0	0	0.06	0	0	0	0
73.1	TRUE	Empty	ADP-ribosylation factor 4 OS=Mus musculus OX=10090 GN=Arf4 PE=1 SV=2	P61750	Arf4	20 kDa	TRUE	0.66	1.2	[]	unknown	13	5	16	8	7	8	13	8	12	9	1	1	1	1	1	1	1	1	1	1
55.2	TRUE	Empty	Immunoglobulin kappa variable 4-57 (Fragment) OS=Mus musculus OX=10090 GN=Igkv4-57 PE=4 SV=2	A0A0A6YYE7	Igkv4-57	13 kDa	TRUE	0.044	0.5	BLM 14 low, PBS high	unknown	9	6	8	10	7	0.5	0.5	13	22	14	0.46	0.48	0.47	0.53	0.55	0	0	0.53	0.57	1
20.5	TRUE	Empty	Ig kappa chain V-V regions OS=Mus musculus OX=10090 PE=1 SV=1	P01649		12 kDa	TRUE	0.11	0.7	[]	unknown	12	10	7	10	4	3	5	11	15	17	0.95	0.94	0.83	0.92	0.77	0.82	0.52	0.51	0.94	0.93
73.2	TRUE	Empty	ADP-ribosylation factor 5 OS=Mus musculus OX=10090 GN=Arf5 PE=1 SV=2	P84084	Arf5	21 kDa	TRUE	0.76	1.1	[]	unknown	11	4	17	8	9	7	11	9	12	7	1	1	1	1	1	1	1	1	1	0.67
106	TRUE	Empty	WD repeat-containing protein 37 OS=Mus musculus OX=10090 GN=Wdr37 PE=1 SV=1	Q8CBE3	Wdr37	55 kDa		0.12	1.3	[]	unknown	11	11	9	10	13	11	0.5	10	6	7	1	1	1	1	1	1	0	1	1	1
107	TRUE	Empty	60S ribosomal protein L26 OS=Mus musculus OX=10090 GN=Rpl26 PE=1 SV=1	P61255	Rpl26	17 kDa	TRUE	0.24	1.5	[]	unknown	16	9	10	6	6	8	15	10	9	4	1	1	1	1	1	1	1	1	1	1
100.1	TRUE	Empty	Lysozyme C-2 OS=Mus musculus OX=10090 GN=Lyz2 PE=1 SV=2	P08905	Lyz2	17 kDa	TRUE	0.2	0.8	[]	unknown	9	7	8	9	6	6	16	10	12	8	1	1	1	1	1	1	1	1	1	1
108	TRUE	Empty	Immunoglobulin heavy variable 14-2 (Fragment) OS=Mus musculus OX=10090 GN=Ighv14-2 PE=4 SV=1	A0A075B5R7	Ighv14-2	13 kDa	TRUE	0.68	0.8	[]	unknown	5	14	8	10	13	6	7	9	16	7	0.99	1	0.98	1	1	1	1	1	1	0.99
102.1	TRUE	Empty	Myosin, light chain 12A, regulatory, non-sarcomeric OS=Mus musculus OX=10090 GN=Myl12a PE=1 SV=1	Q6ZWQ9	Myl12a	20 kDa	TRUE	0.13	17	[]	unknown	7	16	2	3	0.5	4	56	0.5	0.5	0.5	1	1	1	1	0	1	1	0	0	0
96.2	TRUE	Empty	Myosin light polypeptide 6 OS=Mus musculus OX=10090 GN=Myl6 PE=1 SV=1	A0A1W2P6G5	Myl6	15 kDa	TRUE	0.17	2.5	[]	unknown	11	13	3	5	2	6	41	5	4	2	0.54	0.74	0.39	0.55	0.46	0.54	0.83	0.45	0.11	0.1
109.1	TRUE	Empty	Immunoglobulin kappa variable 4-58 OS=Mus musculus OX=10090 GN=Igkv4-58 PE=1 SV=1	A0A075B5M3	Igkv4-58	10 kDa	TRUE	0.13	0.04	[]	unknown	0.5	0.5	0.5	0.5	0.5	0.5	0.5	0.5	19	14	0	0	0	0	0	0	0	0	1	1
110	TRUE	Empty	Peroxiredoxin-6 OS=Mus musculus OX=10090 GN=Prdx6 PE=1 SV=3	O08709 (+1)	Prdx6	25 kDa		0.43	0.7	[]	unknown	7	5	17	5	7	2	6	19	15	8	1	1	1	1	1	1	1	1	1	1
112	TRUE	Empty	Immunoglobulin heavy variable 8-8 (Fragment) OS=Mus musculus OX=10090 GN=Ighv8-8 PE=4 SV=1	A0A0A6YXQ0	Ighv8-8	13 kDa	TRUE	0.42	0.8	[]	unknown	9	7	8	11	6	8	8	7	9	13	1	1	1	1	1	1	1	1	1	1
111	TRUE	Empty	Isoform 2 of Gelsolin OS=Mus musculus OX=10090 GN=Gsn	GELS_MOUSE		?		0.26	18	[]	unknown	5	22	0.5	5	0.5	0.5	57	0.5	0.5	0.5	1	1	0	1	0	0	1	0	0	0
25.5	TRUE	Empty	Ig heavy chain V region 345 OS=Mus musculus OX=10090 PE=1 SV=1	P18526		13 kDa	TRUE	0.39	0.8	[]	unknown	12	9	6	7	6	9	6	9	11	13	0.26	0.36	0.27	0.34	0.33	0.36	0.31	0.1	0.34	0.77
73.3	TRUE	Empty	ADP-ribosylation factor 3 OS=Mus musculus OX=10090 GN=Arf3 PE=2 SV=2	P61205 (+1)	Arf3	21 kDa	TRUE	0.93	1	[]	unknown	10	4	16	6	8	6	10	9	11	9	0.99	0.99	0.99	0.85	0.98	1	0.99	1	1	1
113	TRUE	Empty	40S ribosomal protein S4, X isoform OS=Mus musculus OX=10090 GN=Rps4x PE=1 SV=2	P62702	Rps4x	30 kDa		0.082	2.2	[]	unknown	18	10	12	7	10	0.5	11	10	5	3	1	1	1	1	1	0	1	1	1	1
25.6	TRUE	Empty	Immunoglobulin heavy variable 5-15 OS=Mus musculus OX=10090 GN=Ighv5-15 PE=4 SV=1	A0A075B5Q9	Ighv5-15	13 kDa	TRUE	0.016	0.7	BLM 14 low, PBS high	unknown	6	7	8	13	8	11	7	10	9	10	0.33	0.34	0.34	1	0.41	1	0.41	0.96	0.42	0.39
116	TRUE	Empty	40S ribosomal protein S25 OS=Mus musculus OX=10090 GN=Rps25 PE=1 SV=1	P62852	Rps25	14 kDa		0.78	1.1	[]	unknown	11	6	10	5	9	10	9	14	6	4	1	1	1	1	1	1	1	1	1	1
109.2	TRUE	Empty	Immunoglobulin kappa variable 4-58 (Fragment) OS=Mus musculus OX=10090 GN=Igkv4-58 PE=1 SV=1	A0A0G2JGI6 (+1)	Igkv4-58	13 kDa	TRUE	0.13	0.06	[]	unknown	0.5	0.5	0.5	0.5	0.5	0.5	0.5	0.5	15	11	0	0	0	0	0	0	0	0	0.9	0.58
118	TRUE	Empty	Immunoglobulin heavy variable V9-3 (Fragment) OS=Mus musculus OX=10090 GN=Ighv9-3 PE=1 SV=1	A0A0B4J1J5	Ighv9-3	13 kDa	TRUE	0.77	1.1	[]	unknown	13	10	8	7	4	4	5	4	10	14	1	1	1	1	1	1	1	1	1	1
21.7	TRUE	Empty	14-3-3 protein sigma OS=Mus musculus OX=10090 GN=Sfn PE=1 SV=2	O70456	Sfn	28 kDa	TRUE	0.92	1.1	[]	unknown	11	0.5	15	8	9	0.5	8	8	11	6	0.99	0	0.99	0.99	0.99	0	0.99	0.98	0.98	0.98
117	TRUE	Empty	Immunoglobulin heavy variable V1-11 (Fragment) OS=Mus musculus OX=10090 GN=Ighv1-11 PE=4 SV=1	A0A0A6YWI9	Ighv1-11	13 kDa		0.08	0.09	[]	unknown	6	0.5	0.5	0.5	0.5	0.5	0.5	6	34	36	1	0	0	0	0	0	0	1	1	1
122	TRUE	Empty	60S ribosomal protein L34 OS=Mus musculus OX=10090 GN=Rpl34 PE=1 SV=2	Q9D1R9	Rpl34	13 kDa		0.81	1	[]	unknown	5	8	9	9	10	10	10	8	6	7	1	1	1	1	1	1	1	1	1	1
120	TRUE	Empty	Complement C1q subcomponent subunit B OS=Mus musculus OX=10090 GN=C1qb PE=1 SV=2	P14106	C1qb	27 kDa		0.81	1.1	[]	unknown	14	10	7	10	0.5	3	9	8	13	8	1	1	1	1	0	1	1	1	1	1
121	TRUE	Empty	ATP synthase subunit alpha, mitochondrial OS=Mus musculus OX=10090 GN=Atp5f1a PE=1 SV=1	Q03265	Atp5f1a	60 kDa		0.089	3.9	[]	unknown	11	8	22	12	8	6	6	0.5	4	6	1	1	1	1	1	1	1	0	1	1
123	TRUE	Empty	40S ribosomal protein S14 OS=Mus musculus OX=10090 GN=Rps14 PE=1 SV=3	P62264	Rps14	16 kDa		0.074	2	[]	unknown	8	8	14	9	11	8	9	4	5	6	1	1	1	1	1	1	1	1	1	1
125	TRUE	Empty	Immunoglobulin heavy variable 9-1 OS=Mus musculus OX=10090 GN=Ighv9-1 PE=4 SV=1	A0A075B5S1	Ighv9-1	11 kDa	TRUE	0.93	1	[]	unknown	12	10	6	7	2	4	6	3	12	14	0.99	1	1	1	1	1	1	1	1	1
126.1	TRUE	Empty	Heterogeneous nuclear ribonucleoprotein H2 OS=Mus musculus OX=10090 GN=Hnrnph2 PE=1 SV=1	P70333	Hnrnph2	49 kDa	TRUE	0.066	2.4	[]	unknown	8	9	8	11	10	11	7	3	0.5	7	0.99	1	1	0.99	0.95	1	0.97	0.95	0	0.99
119.1	TRUE	Empty	Histone H2A type 1-G OS=Mus musculus OX=10090 GN=H2ac11 PE=1 SV=1	C0HKE5 (+4)	H2ac11	14 kDa	TRUE	0.82	1.1	[]	unknown	6	13	6	5	8	5	16	9	9	5	0.84	1	0.85	0.8	0.85	0.92	1	0.92	0.84	0.84
124	TRUE	Empty	Immunoglobulin heavy variable 3-1 (Fragment) OS=Mus musculus OX=10090 GN=Ighv3-1 PE=4 SV=1	A0A075B5S6	Ighv3-1	13 kDa	TRUE	0.87	1.1	[]	unknown	8	3	6	24	5	0.5	9	6	0.5	9	1	1	1	1	0.98	0	1	0.98	0	1
126.2	TRUE	Empty	Heterogeneous nuclear ribonucleoprotein H OS=Mus musculus OX=10090 GN=Hnrnph1 PE=1 SV=3	O35737	Hnrnph1	49 kDa	TRUE	0.096	2.2	[]	unknown	8	8	7	11	10	11	7	3	0.5	7	0.47	0.49	0.53	0.41	0.39	0.48	0.22	0.45	0	0.46
127	TRUE	Empty	Resistin-like gamma OS=Mus musculus OX=10090 GN=Retnlg PE=1 SV=1	Q8K426	Retnlg	13 kDa		0.33	0.7	[]	unknown	8	5	9	2	5	8	10	9	7	14	1	1	1	1	1	1	1	1	1	1
128	TRUE	Empty	40S ribosomal protein S5 OS=Mus musculus OX=10090 GN=Rps5 PE=1 SV=1	Q91V55	Rps5	23 kDa		0.043	2.1	BLM 14 high, PBS low	unknown	8	13	12	4	9	6	10	7	6	3	1	1	1	1	1	1	1	1	1	1
129	TRUE	Empty	Heterogeneous nuclear ribonucleoproteins A2/B1 OS=Mus musculus OX=10090 GN=Hnrnpa2b1 PE=1 SV=2	ROA2_MOUSE		?		0.87	0.9	[]	unknown	16	0.5	10	2	8	4	6	9	0.5	21	1	0	1	1	1	1	1	1	0	1
52.2	TRUE	Empty	Ig kappa chain V-V region MOPC 149 OS=Mus musculus OX=10090 PE=1 SV=1	P01636		12 kDa	TRUE	0.48	0.9	[]	unknown	11	8	6	10	6	4	0.5	10	8	11	1	1	1	1	1	1	0	1	1	1
119.2	TRUE	Empty	Histone H2A type 2-C OS=Mus musculus OX=10090 GN=Hist2h2ac PE=1 SV=3	Q64523	Hist2h2ac	14 kDa	TRUE	0.9	1	[]	unknown	6	12	6	5	8	5	13	9	9	5	0.51	0.66	0.51	0.46	0.51	0.51	1	0.62	0.51	0.51
130	TRUE	Empty	Immunoglobulin kappa variable 4-59 (Fragment) OS=Mus musculus OX=10090 GN=Igkv4-59 PE=4 SV=1	A0A0B4J1I8 (+3)	Igkv4-59	13 kDa	TRUE	0.12	0.08	[]	unknown	0.5	0.5	0.5	0.5	0.5	0.5	6	9	10	0.5	0	0	0	0	0	0	0.97	0.99	1	0
54.2	TRUE	Empty	Ig heavy chain V region J539 OS=Mus musculus OX=10090 PE=1 SV=1	P01810		13 kDa	TRUE	1	1	[]	unknown	0.5	0.5	0.5	0.5	0.5	0.5	0.5	0.5	0.5	0.5	0	0	0	0	0	0	0	0	0	0
131	TRUE	Empty	Cysteine and glycine-rich protein 1 OS=Mus musculus OX=10090 GN=Csrp1 PE=1 SV=3	P97315	Csrp1	21 kDa		0.39	1.5	[]	unknown	8	5	16	8	5	0.5	10	7	8	4	1	1	1	1	1	0	1	1	1	1
132	TRUE	Empty	High mobility group protein B1 (Fragment) OS=Mus musculus OX=10090 GN=Hmgb1 PE=1 SV=1	A0A0J9YUZ4	Hmgb1	24 kDa		0.37	2.7	[]	unknown	0.5	0.5	3	0.5	0.5	0.5	0.5	0.5	0.5	0.5	0	0	1	0	0	0	0	0	0	0
114.1	TRUE	Empty	Pancreatic trypsin OS=Mus musculus OX=10090 GN=Try4 PE=1 SV=1	Q9R0T7	Try4	26 kDa	TRUE	0.14	0.07	[]	unknown	0.5	0.5	0.5	0.5	0.5	0.5	0.5	0.5	8	13	0	0	0	0	0	0	0	0	1	1
69.2	TRUE	Empty	H-2 class I histocompatibility antigen, Q7 alpha chain OS=Mus musculus OX=10090 GN=H2-Q7 PE=3 SV=2	E9PWT4 (+2)	H2-Q7	35 kDa	TRUE	0.44	0.8	[]	unknown	9	4	9	0.5	13	6	0.5	7	10	10	0.76	0.08	0.07	0	1	0.06	0	1	1	1
102.2	TRUE	Empty	Myosin regulatory light polypeptide 9 OS=Mus musculus OX=10090 GN=Myl9 PE=1 SV=3	Q9CQ19	Myl9	20 kDa	TRUE	0.19	12	[]	unknown	5	12	0.5	0.5	0.5	3	47	0.5	0.5	0.5	1	1	0	0	0	0.69	1	0	0	0
119.3	TRUE	Empty	Histone H2AX OS=Mus musculus OX=10090 GN=H2ax PE=1 SV=2	P27661	H2ax	15 kDa	TRUE	0.85	1	[]	unknown	6	8	6	5	8	5	13	8	9	4	0.45	0.44	0.45	0.41	0.45	0.45	0.92	0.44	0.45	0.11
135	TRUE	Empty	Immunoglobulin heavy variable 5-16 OS=Mus musculus OX=10090 GN=Ighv5-16 PE=1 SV=1	A0A075B5R0 (+1)	Ighv5-16	13 kDa		0.91	1	[]	unknown	8	11	4	13	5	0.5	6	4	8	10	1	1	1	1	1	0	1	1	1	1
137.1	TRUE	Empty	Caveolin-1 OS=Mus musculus OX=10090 GN=Cav1 PE=1 SV=1	CAV1_MOUSE		?	TRUE	0.44	0.8	[]	unknown	4	10	4	2	5	0.5	16	10	6	8	1	1	1	1	1	0	1	1	1	1
134.1	TRUE	Empty	Immunoglobulin heavy variable 7-3 (Fragment) OS=Mus musculus OX=10090 GN=Ighv7-3 PE=4 SV=2	A0A075B5R2	Ighv7-3	13 kDa	TRUE	0.24	0.6	[]	unknown	6	6	8	6	0.5	0.5	7	9	17	7	1	1	1	1	0	0	1	1	1	1
115.1	TRUE	Empty	AP-2 complex subunit alpha-2 OS=Mus musculus OX=10090 GN=Ap2a2 PE=1 SV=2	P17427	Ap2a2	104 kDa	TRUE	0.035	3.3	BLM 14 high, PBS low	unknown	9	10	17	9	7	7	0.5	4	5	2	1	1	1	1	1	1	0	1	1	0.96
136	TRUE	Empty	Immunoglobulin heavy variable 5-9 (Fragment) OS=Mus musculus OX=10090 GN=Ighv5-9 PE=4 SV=1	A0A075B5Q2	Ighv5-9	13 kDa	TRUE	0.24	0.6	[]	unknown	4	9	0.5	4	0.5	14	0.5	7	9	8	0.07	1	0	1	0	1	0	1	1	1
140	TRUE	Empty	60S ribosomal protein L14 OS=Mus musculus OX=10090 GN=Rpl14 PE=1 SV=3	Q9CR57	Rpl14	24 kDa		0.074	2.2	[]	unknown	10	11	5	10	6	5	8	5	4	3	1	1	1	1	1	1	1	1	1	1
139	TRUE	Empty	Dihydrolipoyllysine-residue acetyltransferase component of pyruvate dehydrogenase complex, mitochondrial OS=Mus musculus OX=10090 GN=Dlat PE=1 SV=2	Q8BMF4	Dlat	68 kDa		0.035	0.4	BLM 14 low, PBS high	unknown	7	5	3	6	5	5	3	8	13	13	1	1	1	1	1	1	1	1	1	1
138	TRUE	Empty	60S ribosomal protein L37a OS=Mus musculus OX=10090 GN=Rpl37a PE=1 SV=2	P61514	Rpl37a	10 kDa		0.51	0.8	[]	unknown	6	5	8	4	9	7	5	13	4	8	1	1	1	1	1	1	1	1	1	1
25.7	TRUE	Empty	Immunoglobulin heavy variable 5-4 (Fragment) OS=Mus musculus OX=10090 GN=Ighv5-4 PE=4 SV=1	A0A075B5P9	Ighv5-4	13 kDa	TRUE	0.43	0.8	[]	unknown	6	7	4	8	7	9	4	4	9	9	1	1	1	1	1	1	1	1	1	1
141	TRUE	Empty	60S ribosomal protein L10 OS=Mus musculus OX=10090 GN=Rpl10 PE=1 SV=3	Q6ZWV3	Rpl10	25 kDa		0.049	2.3	BLM 14 high, PBS low	unknown	9	8	9	7	5	4	8	5	6	0.5	1	1	1	1	1	1	1	1	1	0
105.1	TRUE	Empty	Alpha-1-antitrypsin 1-4 OS=Mus musculus OX=10090 GN=Serpina1d PE=1 SV=1	Q00897	Serpina1d	46 kDa	TRUE	0.018	5.2	BLM 14 high, PBS low	unknown	15	8	16	7	3	5	7	0.5	3	4	1	1	1	1	1	0.6	1	0	1	1
142	TRUE	Empty	60S ribosomal protein L23a OS=Mus musculus OX=10090 GN=Rpl23a PE=1 SV=1	P62751	Rpl23a	18 kDa		0.11	2	[]	unknown	12	9	7	6	6	2	9	8	2	4	1	1	1	1	1	1	1	1	1	1
145.1	TRUE	Empty	40S ribosomal protein S3 OS=Mus musculus OX=10090 GN=Rps3 PE=1 SV=1	P62908	Rps3	27 kDa	TRUE	0.018	4.7	BLM 14 high, PBS low	unknown	18	10	12	7	4	0.5	5	5	3	0.5	1	1	1	1	1	0	1	1	1	0
143.1	TRUE	Empty	60S ribosomal protein L18a (Fragment) OS=Mus musculus OX=10090 GN=Rpl18a PE=1 SV=1	A0A1D5RM85	Rpl18a	25 kDa	TRUE	0.22	1.5	[]	unknown	10	5	8	5	8	6	10	7	5	3	0.99	0.92	0.97	0.91	0.97	0.91	0.96	0.96	0.91	0.81
105.2	TRUE	Empty	Alpha-1-antitrypsin 1-1 OS=Mus musculus OX=10090 GN=Serpina1a PE=1 SV=4	P07758	Serpina1a	46 kDa	TRUE	0.023	5.2	BLM 14 high, PBS low	unknown	12	7	15	7	3	8	8	0.5	4	2	1	1	1	1	0.98	1	1	0	0.98	0.13
55.3	TRUE	Empty	Immunoglobulin kappa variable 4-57-1 (Fragment) OS=Mus musculus OX=10090 GN=Igkv4-57-1 PE=4 SV=1	A0A075B5M4	Igkv4-57-1	13 kDa	TRUE	1	1	[]	unknown	12	4	0.5	5	18	3	0.5	0.5	8	8	1	0.92	0	1	1	1	0	0	0.89	1
143.2	TRUE	Empty	60S ribosomal protein L18a OS=Mus musculus OX=10090 GN=Rpl18a PE=1 SV=1	P62717	Rpl18a	21 kDa	TRUE	0.22	1.5	[]	unknown	10	5	8	5	8	6	10	7	5	3	0.96	0.82	0.91	0.82	0.92	0.82	0.91	0.9	0.82	0.68
144	TRUE	Empty	Ig kappa chain V region Mem5 (Fragment) OS=Mus musculus OX=10090 PE=1 SV=1	P84750		13 kDa	TRUE	0.073	0.1	[]	unknown	3	0.5	0.5	5	0.5	0.5	0.5	7	5	15	0.59	0	0	0.98	0	0	0	0.81	0.99	1
9.9	TRUE	Empty	Keratin, type I cuticular Ha5 OS=Mus musculus OX=10090 GN=Krt35 PE=1 SV=1	Q497I4	Krt35	51 kDa	TRUE	0.37	0.1	[]	unknown	0.5	0.5	0.5	14	0.5	0.5	10	10	0.5	0.5	0	0	0	0.95	0	0	0.76	0.93	0	0
146	TRUE	Empty	40S ribosomal protein S9 OS=Mus musculus OX=10090 GN=Rps9 PE=1 SV=3	Q6ZWN5	Rps9	23 kDa		0.096	2.5	[]	unknown	15	7	8	4	5	3	8	6	4	2	1	1	1	1	1	1	1	1	1	1
133.1	TRUE	Empty	Immunoglobulin heavy variable V14-3 (Fragment) OS=Mus musculus OX=10090 GN=Ighv14-3 PE=4 SV=1	A0A075B5R9	Ighv14-3	13 kDa	TRUE	0.14	0.6	[]	unknown	5	6	4	9	9	0.5	6	9	10	5	1	1	0.93	1	1	0	0.99	1	1	0.99
149	TRUE	Empty	Cofilin-1 OS=Mus musculus OX=10090 GN=Cfl1 PE=1 SV=3	P18760	Cfl1	19 kDa		0.39	2.1	[]	unknown	6	4	21	3	6	3	7	4	8	3	1	1	1	1	1	1	1	1	1	1
150	TRUE	Empty	Destrin OS=Mus musculus OX=10090 GN=Dstn PE=1 SV=3	Q9R0P5	Dstn	19 kDa		0.38	1.7	[]	unknown	4	6	15	7	8	7	3	5	5	5	1	1	1	1	1	1	1	1	1	1
148	TRUE	Empty	Peptidyl-prolyl cis-trans isomerase A OS=Mus musculus OX=10090 GN=Ppia PE=1 SV=2	P17742	Ppia	18 kDa	TRUE	0.59	1.6	[]	unknown	6	2	22	4	4	0.5	2	5	9	5	1	1	1	1	1	0	1	1	1	1
147	TRUE	Empty	Ribosomal protein OS=Mus musculus OX=10090 GN=Rpl10a PE=1 SV=1	A0A3B2WBL1 (+1)	Rpl10a	25 kDa		0.033	3.3	BLM 14 high, PBS low	unknown	11	10	7	9	5	3	9	0.5	6	2	1	1	1	1	1	1	1	0	1	1
151	TRUE	Empty	Immunoglobulin kappa variable 12-46 (Fragment) OS=Mus musculus OX=10090 GN=Igkv12-46 PE=1 SV=2	A0A140T8P6	Igkv12-46	13 kDa	TRUE	0.085	0.4	[]	unknown	8	6	0.5	4	0.5	0.5	0.5	14	8	12	1	1	0	1	0	0	0	1	1	1
69.3	TRUE	Empty	H-2 class I histocompatibility antigen, Q9 alpha chain (Fragment) OS=Mus musculus OX=10090 GN=H2-Q9 PE=3 SV=1	P14431	H2-Q9	23 kDa	TRUE	0.84	1	[]	unknown	8	4	9	0.5	12	0.5	0.5	7	7	8	0.06	0.06	0.06	0	0.79	0	0	0.74	0.83	0.74
153.1	TRUE	Empty	ATP synthase subunit O, mitochondrial OS=Mus musculus OX=10090 GN=Atp5po PE=1 SV=1	Q9DB20	Atp5po	23 kDa	TRUE	0.3	1.4	[]	unknown	7	7	12	5	2	5	6	9	5	4	1	1	1	1	1	1	1	1	1	1
152	TRUE	Empty	Immunoglobulin kappa variable 14-126 (Fragment) OS=Mus musculus OX=10090 GN=Igkv14-126 PE=4 SV=7	A0A075B5K0	Igkv14-126	13 kDa	TRUE	< 0.00010	0.04	BLM 14 low, PBS high	unknown	0.5	0.5	0.5	7	0.5	0.5	0.5	11	13	11	0	0	0	0.58	0	0	0	1	1	0.75
155	TRUE	Empty	60S ribosomal protein L27 OS=Mus musculus OX=10090 GN=Rpl27 PE=1 SV=2	P61358	Rpl27	16 kDa		0.016	1.5	BLM 14 high, PBS low	unknown	7	8	8	4	7	7	8	5	6	4	1	1	1	1	1	1	1	1	1	1
156	TRUE	Empty	60S ribosomal protein L8 OS=Mus musculus OX=10090 GN=Rpl8 PE=1 SV=2	P62918	Rpl8	28 kDa		0.14	2.2	[]	unknown	11	5	9	7	8	0.5	8	6	0.5	5	1	1	1	1	1	0	1	1	0	1
115.2	TRUE	Empty	Isoform B of AP-2 complex subunit alpha-1 OS=Mus musculus OX=10090 GN=Ap2a1	AP2A1_MOUSE		?	TRUE	0.021	3.8	BLM 14 high, PBS low	unknown	8	11	15	6	6	8	0.5	2	5	2	1	1	1	1	0.99	1	0	0.9	1	1
9.1	TRUE	Empty	Keratin, type I cuticular Ha2 OS=Mus musculus OX=10090 GN=Krt32 PE=1 SV=1	B1ATJ5	Krt32	51 kDa	TRUE	1	1	[]	unknown	0.5	0.5	0.5	0.5	0.5	0.5	0.5	0.5	0.5	0.5	0	0	0	0	0	0	0	0	0	0
159	TRUE	Empty	Copine-1 OS=Mus musculus OX=10090 GN=Cpne1 PE=1 SV=1	Q8C166	Cpne1	59 kDa	TRUE	0.057	2.5	[]	unknown	9	6	13	6	6	4	6	3	5	3	1	1	1	1	1	1	1	1	1	1
158	TRUE	Empty	40S ribosomal protein S10 OS=Mus musculus OX=10090 GN=Rps10 PE=1 SV=1	P63325	Rps10	19 kDa	TRUE	0.0058	2.4	BLM 14 high, PBS low	unknown	10	10	9	5	4	3	7	2	5	5	1	1	1	1	1	1	1	1	1	1
160.1	TRUE	Empty	AP-2 complex subunit beta OS=Mus musculus OX=10090 GN=Ap2b1 PE=1 SV=1	AP2B1_MOUSE		?	TRUE	0.11	2.3	[]	unknown	8	8	14	6	8	6	0.5	3	2	8	1	1	1	1	1	1	0	0.99	1	1
162	TRUE	Empty	40S ribosomal protein S20 OS=Mus musculus OX=10090 GN=Rps20 PE=1 SV=1	P60867	Rps20	13 kDa		0.23	0.6	[]	unknown	7	5	0.5	5	5	6	7	8	7	6	1	1	0	1	1	1	1	1	1	1
161	TRUE	Empty	60S ribosomal protein L18 OS=Mus musculus OX=10090 GN=Rpl18 PE=1 SV=3	P35980	Rpl18	22 kDa		0.015	4	BLM 14 high, PBS low	unknown	13	8	9	6	4	3	9	4	0.5	3	1	1	1	1	1	1	1	1	0	1
163	TRUE	Empty	Histone H3.1 OS=Mus musculus OX=10090 GN=H3c1 PE=1 SV=2	P68433 (+1)	H3c1	15 kDa		0.64	1.1	[]	unknown	5	6	4	0.5	6	7	14	5	5	4	1	1	1	0	1	1	1	0.99	1	0.99
166	TRUE	Empty	Histone H1.0 OS=Mus musculus OX=10090 GN=H1-0 PE=2 SV=4	P10922	H1-0	21 kDa		0.25	0.7	[]	unknown	6	5	5	3	5	6	7	10	7	5	1	1	1	1	1	1	1	1	1	1
157.1	TRUE	Empty	Ras-related C3 botulinum toxin substrate 2 OS=Mus musculus OX=10090 GN=Rac2 PE=1 SV=1	Q05144	Rac2	21 kDa	TRUE	0.54	1.4	[]	unknown	6	4	14	2	5	3	6	3	9	5	1	0.93	1	0.62	0.9	0.86	0.99	0.98	0.96	0.96
165	TRUE	Empty	Clathrin interactor 1 OS=Mus musculus OX=10090 GN=Clint1 PE=1 SV=2	EPN4_MOUSE		?		0.89	0.9	[]	unknown	10	4	4	7	7	8	0.5	7	8	4	1	1	1	1	1	1	0	1	1	1
164.1	TRUE	Empty	Ig kappa chain V-III region PC 7043 OS=Mus musculus OX=10090 PE=1 SV=1	P01665 (+1)		12 kDa	TRUE	0.61	0.6	[]	unknown	0.5	0.5	12	7	0.5	0.5	0.5	0.5	10	11	0	0	0.99	0.32	0	0	0	0	1	1
167	TRUE	Empty	Immunoglobulin lambda variable 2 OS=Mus musculus OX=10090 GN=Iglv2 PE=1 SV=1	A0A075B664 (+1)	Iglv2	12 kDa	TRUE	0.59	0.5	[]	unknown	4	0.5	0.5	0.5	0.5	0.5	0.5	0.5	0.5	10	0.99	0	0	0	0	0	0	0	0	1
145.2	TRUE	Empty	40S ribosomal protein S3 OS=Mus musculus OX=10090 GN=Rps3 PE=1 SV=1	D3YV43	Rps3	21 kDa	TRUE	0.37	11	[]	unknown	15	0.5	0.5	0.5	0.5	0.5	0.5	0.5	0.5	0.5	0.06	0	0	0	0	0	0	0	0	0
168	TRUE	Empty	Cathelicidin antimicrobial peptide OS=Mus musculus OX=10090 GN=Camp PE=1 SV=2	P51437	Camp	19 kDa		0.22	1.4	[]	unknown	6	9	11	0.5	0.5	0.5	12	7	5	7	1	1	1	0	0	0	1	1	1	1
169	TRUE	Empty	Immunoglobulin lambda variable 1 (Fragment) OS=Mus musculus OX=10090 GN=Iglv1 PE=4 SV=1	A0A075B663 (+2)	Iglv1	12 kDa	TRUE	0.78	0.7	[]	unknown	0.5	0.5	6	0.5	0.5	0.5	0.5	0.5	0.5	9	0	0	1	0	0	0	0	0	0	1
171	TRUE	Empty	Peroxiredoxin-2 OS=Mus musculus OX=10090 GN=Prdx2 PE=1 SV=3	Q61171	Prdx2	22 kDa		0.85	1.2	[]	unknown	3	3	16	4	5	2	6	11	5	3	1	1	1	1	1	1	1	1	1	1
119.4	TRUE	Empty	Histone H2A.Z OS=Mus musculus OX=10090 GN=H2az1 PE=1 SV=2	P0C0S6 (+1)	H2az1	14 kDa	TRUE	0.44	0.8	[]	unknown	5	6	4	4	5	4	12	7	7	4	0.11	0.1	0.1	0.09	0.12	0.12	1	0.13	0.12	0.13
172	TRUE	Empty	Ribosomal protein S18, pseudogene 5 OS=Mus musculus OX=10090 GN=Rps18-ps5 PE=3 SV=1	A0A1Y7VKY1 (+2)	Rps18-ps5	18 kDa		0.24	1.8	[]	unknown	9	4	12	3	4	5	4	6	2	6	1	1	1	1	1	1	1	1	1	1
173	TRUE	Empty	40S ribosomal protein S23 OS=Mus musculus OX=10090 GN=Rps23 PE=1 SV=3	P62267	Rps23	16 kDa		0.037	2.6	BLM 14 high, PBS low	unknown	8	6	8	6	5	5	4	0.5	5	3	1	1	1	1	1	1	1	0	1	1
174	TRUE	Empty	60S ribosomal protein L22 OS=Mus musculus OX=10090 GN=Rpl22 PE=1 SV=2	P67984	Rpl22	15 kDa		0.89	0.9	[]	unknown	6	6	4	0.5	5	5	10	10	3	4	1	1	1	0	1	1	1	1	1	1
175	TRUE	Empty	Pulmonary surfactant-associated protein C OS=Mus musculus OX=10090 GN=Sftpc PE=1 SV=1	Q6P8P8	Sftpc	21 kDa		0.12	8.4	[]	unknown	26	5	11	0.5	0.5	0.5	3	4	0.5	0.5	1	1	1	0	0	0	1	1	0	0
157.2	TRUE	Empty	Ras-related C3 botulinum toxin substrate 1 OS=Mus musculus OX=10090 GN=Rac1 PE=1 SV=1	P63001 (+1)	Rac1	21 kDa	TRUE	0.56	1.4	[]	unknown	5	4	14	2	5	4	5	2	8	6	0.82	0.76	1	0.44	0.71	1	0.79	0.56	0.71	0.98
176	TRUE	Empty	Ig heavy chain V region AMPC1 OS=Mus musculus OX=10090 PE=1 SV=1	P01803		13 kDa	TRUE	0.38	0.6	[]	unknown	6	6	6	4	0.5	3	3	5	16	7	0.73	0.72	0.74	0.7	0	0.7	0.71	0.7	1	1
42.3	TRUE	Empty	Heat shock 70 kDa protein 1B OS=Mus musculus OX=10090 GN=Hspa1b PE=1 SV=3	P17879 (+1)	Hspa1b	70 kDa	TRUE	0.54	1.2	[]	unknown	6	7	4	4	4	10	6	7	3	4	1	1	0.06	0.07	0.9	1	1	0.84	0.5	0.44
177	TRUE	Empty	Ig heavy chain V region 93G7 OS=Mus musculus OX=10090 PE=2 SV=1	P01746 (+1)		16 kDa	TRUE	0.48	0.6	[]	unknown	0.5	6	6	0.5	3	0.5	3	8	0.5	14	0	1	0.97	0	0.97	0	1	0.96	0	0.97
179	TRUE	Empty	60S ribosomal protein L11 OS=Mus musculus OX=10090 GN=Rpl11 PE=1 SV=4	Q9CXW4	Rpl11	20 kDa		0.74	1.1	[]	unknown	7	6	4	7	3	2	10	5	6	5	1	1	1	1	1	1	1	1	1	1
180	TRUE	Empty	Immunoglobulin kappa variable 8-26 (Fragment) OS=Mus musculus OX=10090 GN=Igkv8-26 PE=4 SV=7	A0A075B5N5	Igkv8-26	14 kDa	TRUE	0.95	1	[]	unknown	6	4	4	9	4	7	0.5	6	8	0.5	0.95	0.95	0.99	0.97	0.99	0.99	0	0.99	0.99	0
182	TRUE	Empty	60S ribosomal protein L29 OS=Mus musculus OX=10090 GN=Rpl29 PE=1 SV=2	P47915	Rpl29	18 kDa	TRUE	0.026	3.8	BLM 14 high, PBS low	unknown	7	5	7	8	8	5	7	4	0.5	0.5	1	1	1	1	1	1	1	1	0	0
181	TRUE	Empty	60S ribosomal protein L13 OS=Mus musculus OX=10090 GN=Rpl13 PE=1 SV=3	P47963	Rpl13	24 kDa		0.024	5.6	BLM 14 high, PBS low	unknown	7	12	6	8	5	0.5	10	2	2	0.5	1	1	1	1	1	0	1	1	1	0
170.1	TRUE	Empty	Ras-related protein Rab-1A OS=Mus musculus OX=10090 GN=Rab1A PE=1 SV=3	P62821	Rab1A	23 kDa	TRUE	0.15	2.1	[]	unknown	9	6	15	0.5	3	0.5	3	7	5	2	1	1	1	0	0.76	0	0.65	1	0.89	0.62
164.2	TRUE	Empty	Ig kappa chain V-III region PC 6308 OS=Mus musculus OX=10090 PE=1 SV=1	P01667		12 kDa	TRUE	0.48	0.3	[]	unknown	2	0.5	0.5	7	0.5	0.5	0.5	0.5	8	0.5	0.99	0	0	0.32	0	0	0	0	0.72	0
187.1	TRUE	Empty	Dihydropyrimidinase-related protein 2 OS=Mus musculus OX=10090 GN=Dpysl2 PE=1 SV=2	O08553	Dpysl2	62 kDa	TRUE	0.74	1.4	[]	unknown	2	0.5	14	2	9	7	4	4	4	4	1	0	1	1	1	1	1	1	1	1
185	TRUE	Empty	Methanethiol oxidase OS=Mus musculus OX=10090 GN=Selenbp1 PE=1 SV=2	P17563	Selenbp1	53 kDa		0.54	1.6	[]	unknown	3	5	17	4	5	0.5	3	6	3	7	1	1	1	1	1	0	1	1	1	1
183	TRUE	Empty	Isoform 2 of Clathrin light chain B OS=Mus musculus OX=10090 GN=Cltb	CLCB_MOUSE		?		0.69	0.9	[]	unknown	7	3	10	2	3	0.5	2	7	6	10	1	1	1	1	1	0	1	1	1	1
184	TRUE	Empty	60S ribosomal protein L35a OS=Mus musculus OX=10090 GN=Rpl35a PE=1 SV=2	O55142	Rpl35a	13 kDa		0.024	2.4	BLM 14 high, PBS low	unknown	4	7	6	7	2	4	12	2	2	3	1	1	1	1	0.97	1	1	1	0.97	1
186	TRUE	Empty	AP-2 complex subunit sigma OS=Mus musculus OX=10090 GN=Ap2s1 PE=1 SV=1	P62743	Ap2s1	17 kDa		0.61	0.8	[]	unknown	7	5	0.5	0.5	4	5	4	7	4	5	1	1	0	0	1	1	1	1	1	1
191	TRUE	Empty	60S ribosomal protein L17 OS=Mus musculus OX=10090 GN=Rpl17 PE=1 SV=1	Q6ZWZ7 (+1)	Rpl17	21 kDa		0.032	4	BLM 14 high, PBS low	unknown	6	11	13	4	4	2	5	4	3	0.5	1	1	1	1	1	1	1	1	1	0
188	TRUE	Empty	Complement C3 OS=Mus musculus OX=10090 GN=C3 PE=1 SV=3	CO3_MOUSE		?		0.84	1.1	[]	unknown	10	6	6	2	0.5	4	2	3	5	12	1	1	1	1	0	1	1	1	1	1
190	TRUE	Empty	Triosephosphate isomerase OS=Mus musculus OX=10090 GN=Tpi1 PE=1 SV=4	P17751	Tpi1	32 kDa		0.63	1.6	[]	unknown	4	2	19	5	5	0.5	2	10	5	0.5	1	1	1	1	1	0	1	1	1	0
189	TRUE	Empty	Desmoplakin OS=Mus musculus OX=10090 GN=Dsp PE=1 SV=1	E9Q557	Dsp	333 kDa		0.46	2.7	[]	unknown	0.5	2	11	21	3	2	7	4	0.5	0.5	0	1	1	1	1	1	1	1	0	0
100.2	TRUE	Empty	Lysozyme C-1 OS=Mus musculus OX=10090 GN=Lyz1 PE=1 SV=1	P17897	Lyz1	17 kDa	TRUE	0.069	0.6	[]	unknown	5	3	2	5	4	2	9	5	6	6	1	0.16	1	0.11	1	0.11	1	1	1	1
105.3	TRUE	Empty	Alpha-1-antitrypsin 1-2 OS=Mus musculus OX=10090 GN=Serpina1b PE=1 SV=2	P22599	Serpina1b	46 kDa	TRUE	0.017	5.1	BLM 14 high, PBS low	unknown	10	6	12	4	0.5	6	5	0.5	3	2	1	0.53	1	0.67	0	0.99	0.75	0	0.9	0.13
2.24	TRUE	Empty	Keratin, type II cuticular 87 OS=Mus musculus OX=10090 GN=Krt87 PE=2 SV=2	Q6IMF0	Krt87	55 kDa	TRUE	1	1	[]	unknown	0.5	0.5	0.5	11	0.5	0.5	0.5	0.5	0.5	0.5	0	0	0	0.36	0	0	0	0	0	0
192	TRUE	Empty	Methyltransferase-like 7A1 OS=Mus musculus OX=10090 GN=Mettl7a1 PE=1 SV=1	Q8C6B0	Mettl7a1	28 kDa		0.21	0.6	[]	unknown	5	2	5	3	8	4	4	7	8	4	1	1	1	1	1	1	1	1	1	1
193	TRUE	Empty	Cleavage and polyadenylation specificity factor subunit 5 OS=Mus musculus OX=10090 GN=Nudt21 PE=1 SV=1	Q9CQF3	Nudt21	26 kDa		0.18	0.5	[]	unknown	2	5	4	4	6	0.5	0.5	13	6	5	1	1	1	1	1	0	0	1	1	1
170.2	TRUE	Empty	Ras-related protein Rab-1B (Fragment) OS=Mus musculus OX=10090 GN=Rab1b PE=1 SV=1	A0A494B945 (+1)	Rab1b	28 kDa	TRUE	0.18	2.1	[]	unknown	8	5	14	0.5	3	0.5	3	6	5	2	0.99	0.97	1	0	0.86	0	0.78	0.93	0.96	0.74
194	TRUE	Empty	Immunoglobulin kappa variable 8-34 (Fragment) OS=Mus musculus OX=10090 GN=Igkv8-34 PE=4 SV=4	A0A0G2JDU0	Igkv8-34	13 kDa	TRUE	0.52	0.8	[]	unknown	5	4	2	0.5	0.5	7	0.5	4	5	4	0.7	0.54	0.46	0	0	0.62	0	0.8	0.71	0.87
2.25	TRUE	Empty	Keratin, type II cuticular Hb6 OS=Mus musculus OX=10090 GN=Krt86 PE=2 SV=2	P97861	Krt86	53 kDa	TRUE	1	1	[]	unknown	0.5	0.5	0.5	0.5	0.5	0.5	0.5	0.5	0.5	0.5	0	0	0	0	0	0	0	0	0	0
196	TRUE	Empty	60S ribosomal protein L13a OS=Mus musculus OX=10090 GN=Rpl13a PE=1 SV=4	P19253	Rpl13a	23 kDa		0.05	3.5	[]	unknown	4	9	6	6	6	4	7	3	0.5	2	0.97	1	1	1	1	1	1	1	0	1
195	TRUE	Empty	Protein disulfide-isomerase OS=Mus musculus OX=10090 GN=P4hb PE=1 SV=2	P09103	P4hb	57 kDa		0.17	7.7	[]	unknown	6	4	21	4	3	5	0.5	0.5	0.5	3	1	1	1	1	1	1	0	0	0	1
47.3	TRUE	Empty	Glyceraldehyde-3-phosphate dehydrogenase OS=Mus musculus OX=10090 GN=Gapdhs PE=1 SV=1	A0A0R4J0X7 (+2)	Gapdhs	47 kDa	TRUE	0.26	1.6	[]	unknown	5	5	11	7	4	0.5	4	5	4	4	0.69	0.69	0.69	0.72	0.69	0	0.77	0.94	0.68	0.69
197	TRUE	Empty	Zinc finger ZZ-type and EF-hand domain-containing protein 1 OS=Mus musculus OX=10090 GN=Zzef1 PE=1 SV=1	A0A140LJ04 (+2)	Zzef1	331 kDa		0.033	5	BLM 14 high, PBS low	unknown	9	7	4	7	9	7	0.5	0.5	3	0.5	1	1	1	1	1	1	0	0	1	0
198	TRUE	Empty	Tyrosine-protein kinase OS=Mus musculus OX=10090 GN=Src PE=1 SV=1	F8WI90 (+1)	Src	60 kDa		0.33	28	[]	unknown	38	0.5	3	0.5	0.5	0.5	0.5	0.5	0.5	0.5	1	0	1	0	0	0	0	0	0	0
154.1	TRUE	Empty	Isoform 2 of Tropomyosin alpha-3 chain OS=Mus musculus OX=10090 GN=Tpm3	TPM3_MOUSE		?	TRUE	0.28	8.3	[]	unknown	2	10	0.5	0.5	0.5	0.5	33	0.5	0.5	0.5	0.99	1	0	0	0	0	1	0	0	0
199	TRUE	Empty	Actin-related protein 2/3 complex subunit 4 OS=Mus musculus OX=10090 GN=Arpc4 PE=1 SV=3	P59999	Arpc4	20 kDa		0.045	2.6	BLM 14 high, PBS low	unknown	5	5	7	2	4	2	13	0.5	4	2	1	1	1	1	1	1	1	0	1	1
200	TRUE	Empty	Caveolae-associated protein 2 OS=Mus musculus OX=10090 GN=Cavin2 PE=1 SV=3	Q63918	Cavin2	47 kDa		0.072	0.2	[]	unknown	3	0.5	0.5	2	15	5	4	9	6	3	1	0	0	1	1	1	1	1	1	1
133.2	TRUE	Empty	Immunoglobulin heavy variable 14-1 (Fragment) OS=Mus musculus OX=10090 GN=Ighv14-1 PE=4 SV=1	A0A075B5R4	Ighv14-1	13 kDa	TRUE	0.099	0.5	[]	unknown	4	5	0.5	0.5	0.5	0.5	5	7	9	5	1	1	0	0	0	0	1	0.4	1	1
203	TRUE	Empty	40S ribosomal protein S12 OS=Mus musculus OX=10090 GN=Rps12 PE=1 SV=1	A0A1W2P7A1 (+2)	Rps12	16 kDa		0.07	1.5	[]	unknown	6	7	5	0.5	3	6	6	4	5	3	1	1	1	0	1	1	1	1	1	1
204	TRUE	Empty	Beta-2-microglobulin OS=Mus musculus OX=10090 GN=B2m PE=1 SV=2	P01887	B2m	14 kDa		0.0079	0.07	BLM 14 low, PBS high	unknown	0.5	0.5	0.5	0.5	4	0.5	0.5	8	10	5	0	0	0	0	1	0	0	1	1	1
202	TRUE	Empty	Immunoglobulin heavy variable 13-2 OS=Mus musculus OX=10090 GN=Ighv13-2 PE=4 SV=2	A0A087WPN7 (+1)	Ighv13-2	11 kDa		0.0023	0.07	BLM 14 low, PBS high	unknown	0.5	2	0.5	0.5	0.5	0.5	0.5	12	13	18	0	1	0	0	0	0	0	1	1	1
11.5	TRUE	Empty	RIKEN cDNA 2010300C02 gene OS=Mus musculus OX=10090 GN=2010300C02Rik PE=1 SV=1	E9Q3M9	2010300C02Rik	126 kDa	TRUE	1	1	[]	unknown	0.5	0.5	0.5	0.5	0.5	0.5	0.5	0.5	0.5	0.5	0	0	0	0	0	0	0	0	0	0
205	TRUE	Empty	60S ribosomal protein L24 OS=Mus musculus OX=10090 GN=Rpl24 PE=1 SV=2	Q8BP67	Rpl24	18 kDa		0.1	1.6	[]	unknown	6	6	4	4	5	0.5	8	4	4	2	1	1	1	1	1	0	1	1	1	1
206	TRUE	Empty	Immunoglobulin heavy variable V6-5 OS=Mus musculus OX=10090 GN=Ighv6-5 PE=4 SV=1	J3QK03	Ighv6-5	11 kDa	TRUE	0.75	0.8	[]	unknown	0.5	5	6	3	0.5	4	8	0.5	9	5	0	1	1	1	0	1	1	0	1	1
208	TRUE	Empty	Tumor protein D54 OS=Mus musculus OX=10090 GN=Tpd52l2 PE=1 SV=1	Q9CYZ2	Tpd52l2	24 kDa		0.84	0.9	[]	unknown	9	4	5	0.5	4	0.5	0.5	7	6	6	1	1	1	0	1	0	0	1	1	1
207	TRUE	Empty	Phosphofurin acidic cluster sorting protein 1 OS=Mus musculus OX=10090 GN=Pacs1 PE=1 SV=2	Q8K212	Pacs1	105 kDa		0.61	1.5	[]	unknown	5	2	2	3	16	8	0.5	0.5	0.5	5	1	0.97	1	1	1	1	0	0	0	1
209	TRUE	Empty	Predicted gene 5460 OS=Mus musculus OX=10090 GN=Gm5460 PE=2 SV=1	Q3UQ97	Gm5460	27 kDa		0.18	4.3	[]	unknown	4	0.5	2	0.5	0.5	0.5	0.5	0.5	0.5	0.5	0.92	0	0.89	0	0	0	0	0	0	0
70.2	TRUE	Empty	Myosin-11 OS=Mus musculus OX=10090 GN=Myh11 PE=1 SV=1	A0A2R8VHF9 (+1)	Myh11	223 kDa	TRUE	0.37	11	[]	unknown	0.5	15	0.5	0.5	0.5	0.5	26	0.5	0.5	0.5	0	0.38	0	0	0	0	1	0	0	0
214	TRUE	Empty	Ig kappa chain V-II region 7S34.1 OS=Mus musculus OX=10090 PE=1 SV=1	P01630		12 kDa		0.68	0.7	[]	unknown	0.5	0.5	6	5	0.5	0.5	8	0.5	7	3	0	0	1	1	0	0	1	0	1	1
212	TRUE	Empty	40S ribosomal protein S13 OS=Mus musculus OX=10090 GN=Rps13 PE=1 SV=2	P62301	Rps13	17 kDa		0.23	1.6	[]	unknown	6	5	6	2	3	0.5	7	5	0.5	5	1	1	1	1	1	0	1	1	0	1
213	TRUE	Empty	Fibrinogen beta chain OS=Mus musculus OX=10090 GN=Fgb PE=1 SV=1	Q8K0E8	Fgb	55 kDa		0.15	3.8	[]	unknown	7	10	2	0.5	0.5	4	11	0.5	0.5	4	1	1	1	0	0	1	1	0	0	1
211	TRUE	Empty	Dihydrolipoyllysine-residue succinyltransferase component of 2-oxoglutarate dehydrogenase complex, mitochondrial OS=Mus musculus OX=10090 GN=Dlst PE=1 SV=1	ODO2_MOUSE		?		0.21	2.2	[]	unknown	5	7	6	5	7	3	0.5	0.5	0.5	7	1	1	1	1	1	1	0	0	0	1
215	TRUE	Empty	Glutathione peroxidase 3 OS=Mus musculus OX=10090 GN=Gpx3 PE=1 SV=2	P46412	Gpx3	25 kDa		0.012	5	BLM 14 high, PBS low	unknown	8	5	7	0.5	4	0.5	4	0.5	0.5	3	1	1	1	0	1	0	1	0	0	1
216	TRUE	Empty	Apolipoprotein A-I OS=Mus musculus OX=10090 GN=Apoa1 PE=1 SV=2	Q00623	Apoa1	31 kDa	TRUE	0.8	1.2	[]	unknown	5	0.5	14	0.5	0.5	0.5	6	8	3	5	1	0	1	0	0	0	1	1	1	1
217	TRUE	Empty	Immunoglobulin heavy variable V8-4 (Fragment) OS=Mus musculus OX=10090 GN=Ighv8-4 PE=4 SV=1	A0A0A6YW26	Ighv8-4	13 kDa	TRUE	0.37	0.1	[]	unknown	0.5	0.5	0.5	0.5	0.5	0.5	0.5	0.5	0.5	10	0	0	0	0	0	0	0	0	0	1
218	TRUE	Empty	Ubiquitin-40S ribosomal protein S27a OS=Mus musculus OX=10090 GN=Rps27a PE=1 SV=2	P62983	Rps27a	18 kDa		0.67	1.2	[]	unknown	3	5	4	4	3	2	10	2	6	2	1	1	1	1	1	1	1	1	1	1
70.3	TRUE	Empty	Isoform 2 of Myosin-11 OS=Mus musculus OX=10090 GN=Myh11	MYH11_MOUSE		?	TRUE	1	1	[]	unknown	0.5	0.5	0.5	0.5	0.5	0.5	23	0.5	0.5	0.5	0	0	0	0	0	0	0.68	0	0	0
220	TRUE	Empty	Aquaporin-1 OS=Mus musculus OX=10090 GN=Aqp1 PE=1 SV=3	Q02013	Aqp1	29 kDa		0.41	1.8	[]	unknown	0.5	8	6	5	4	2	6	2	2	4	0	1	1	1	1	1	1	1	1	1
221	TRUE	Empty	Ig heavy chain V region MOPC 141 OS=Mus musculus OX=10090 PE=4 SV=1	P01819		16 kDa		1	1	[]	unknown	0.5	4	0.5	5	0.5	0.5	2	0.5	4	0.5	0	1	0	1	0	0	1	0	1	0
222.1	TRUE	Empty	Carboxylesterase 1D OS=Mus musculus OX=10090 GN=Ces1d PE=1 SV=1	Q8VCT4	Ces1d	62 kDa	TRUE	0.28	2.3	[]	unknown	3	3	9	3	6	5	3	2	0.5	4	1	1	1	1	1	1	1	1	0	1
226.1	TRUE	Empty	Progranulin OS=Mus musculus OX=10090 GN=Grn PE=1 SV=2	P28798 (+1)	Grn	63 kDa	TRUE	0.51	1.4	[]	unknown	6	3	4	7	0.5	4	4	4	5	0.5	1	1	1	1	0	1	1	1	1	0
223	TRUE	Empty	60S ribosomal protein L9 (Fragment) OS=Mus musculus OX=10090 GN=Rpl9 PE=1 SV=1	A0A0G2JES3 (+1)	Rpl9	22 kDa		0.36	1.9	[]	unknown	3	5	5	5	0.5	2	6	6	0.5	0.5	1	1	1	1	0	1	1	1	0	0
224	TRUE	Empty	Immunoglobulin kappa variable 16-104 (Fragment) OS=Mus musculus OX=10090 GN=Igkv16-104 PE=4 SV=1	A0A0B4J1I1	Igkv16-104	13 kDa		0.26	0.2	[]	unknown	3	0.5	0.5	0.5	0.5	0.5	0.5	6	17	0.5	1	0	0	0	0	0	0	1	1	0
225	TRUE	Empty	Immunoglobulin kappa variable 12-98 (Fragment) OS=Mus musculus OX=10090 GN=Igkv12-98 PE=4 SV=4	A0A0G2JGF9	Igkv12-98	12 kDa		0.37	0.1	[]	unknown	0.5	0.5	0.5	0.5	0.5	0.5	0.5	13	0.5	0.5	0	0	0	0	0	0	0	1	0	0
210.1	TRUE	Empty	Glutathione S-transferase Mu 1 OS=Mus musculus OX=10090 GN=Gstm1 PE=1 SV=2	P10649	Gstm1	26 kDa	TRUE	0.089	0.3	[]	unknown	0.5	0.5	6	0.5	4	0.5	2	8	8	5	0	0	1	0	0.99	0	0.66	1	1	0.99
154.2	TRUE	Empty	Tropomyosin alpha-1 chain OS=Mus musculus OX=10090 GN=Tpm1 PE=1 SV=1	G5E8R2	Tpm1	29 kDa	TRUE	0.37	6	[]	unknown	0.5	8	0.5	0.5	0.5	0.5	25	0.5	0.5	0.5	0	1	0	0	0	0	1	0	0	0
219.1	TRUE	Empty	Filamin, alpha OS=Mus musculus OX=10090 GN=Flna PE=1 SV=1	B7FAU9 (+1)	Flna	280 kDa	TRUE	0.013	3.6	BLM 14 high, PBS low	unknown	8	5	7	3	0.5	2	5	2	3	0.5	1	1	1	1	0	1	1	0.99	1	0
228	TRUE	Empty	Isoform 1 of Golgin subfamily A member 3 OS=Mus musculus OX=10090 GN=Golga3	GOGA3_MOUSE		?		0.72	1.1	[]	unknown	2	4	3	5	9	6	0.5	2	4	2	1	1	1	1	1	1	0	1	1	1
227	TRUE	Empty	Isoform 2 of Elongator complex protein 6 OS=Mus musculus OX=10090 GN=Elp6	ELP6_MOUSE		?		0.28	2	[]	unknown	5	3	4	7	8	2	0.5	0.5	0.5	5	1	1	1	1	1	0.98	0	0	0	1
201.1	TRUE	Empty	Immunoglobulin heavy variable V10-3 (Fragment) OS=Mus musculus OX=10090 GN=Ighv10-3 PE=4 SV=1	A0A075B5T6	Ighv10-3	14 kDa	TRUE	0.72	1.2	[]	unknown	7	6	2	2	0.5	2	4	3	4	6	1	1	1	0.7	0	1	1	0.69	1	1
201.2	TRUE	Empty	Immunoglobulin heavy variable 10-1 (Fragment) OS=Mus musculus OX=10090 GN=Ighv10-1 PE=4 SV=1	A0A0B4J1J6	Ighv10-1	14 kDa	TRUE	0.82	1.1	[]	unknown	5	5	4	3	0.5	0.5	5	3	3	7	1	1	1	1	0	0	1	0.69	0.77	1
229	TRUE	Empty	40S ribosomal protein S17 OS=Mus musculus OX=10090 GN=Rps17 PE=1 SV=2	P63276	Rps17	16 kDa		0.34	2	[]	unknown	9	4	2	2	2	2	7	4	3	0.5	1	1	1	1	1	1	1	1	1	0
230	TRUE	Empty	CD5 antigen-like OS=Mus musculus OX=10090 GN=Cd5l PE=1 SV=3	Q9QWK4	Cd5l	39 kDa		0.93	0.9	[]	unknown	3	2	4	8	0.5	6	0.5	0.5	3	6	1	1	1	1	0	1	0	0	1	1
231	TRUE	Empty	Heterogeneous nuclear ribonucleoprotein F OS=Mus musculus OX=10090 GN=Hnrnpf PE=1 SV=3	HNRPF_MOUSE		?	TRUE	0.56	2	[]	unknown	0.5	0.5	5	0.5	5	5	5	0.5	0.5	2	0	0	1	0	1	0.91	0.96	0	0	0.95
232	TRUE	Empty	Actin-related protein 2/3 complex subunit 3 OS=Mus musculus OX=10090 GN=Arpc3 PE=1 SV=3	Q9JM76	Arpc3	21 kDa		0.0001	11	BLM 14 high, PBS low	unknown	5	6	6	0.5	0.5	0.5	15	0.5	0.5	0.5	1	1	1	0	0	0	1	0	0	0
105.4	TRUE	Empty	Alpha-1-antitrypsin 1-5 OS=Mus musculus OX=10090 GN=Serpina1e PE=1 SV=1	Q00898	Serpina1e	46 kDa	TRUE	0.01	5.7	BLM 14 high, PBS low	unknown	7	4	6	2	0.5	7	0.5	0.5	0.5	2	0.82	0.45	0.75	0.48	0	1	0	0	0	0.46
12.1	TRUE	Empty	Ig kappa chain V-I region S107A OS=Mus musculus OX=10090 GN=Igkv7-33 PE=1 SV=7	A0A075B5N1 (+2)	Igkv7-33	13 kDa	TRUE	0.37	0.2	[]	unknown	0.5	0.5	0.5	0.5	0.5	0.5	5	9	0.5	0.5	0	0	0	0	0	0	0.72	0.94	0	0
70.4	TRUE	Empty	Myosin-10 OS=Mus musculus OX=10090 GN=Myh10 PE=1 SV=1	Q5SV64 (+1)	Myh10	232 kDa	TRUE	0.29	9	[]	unknown	2	11	0.5	0.5	0.5	0.5	21	0.5	0.5	0.5	0.63	0.99	0	0	0	0	1	0	0	0
137.2	TRUE	Empty	Caveolin (Fragment) OS=Mus musculus OX=10090 GN=Cav1 PE=1 SV=2	D3Z148	Cav1	13 kDa	TRUE	1	1	[]	unknown	0.5	0.5	0.5	0.5	0.5	0.5	0.5	0.5	0.5	0.5	0	0	0	0	0	0	0	0	0	0
233	TRUE	Empty	60S ribosomal protein L7 OS=Mus musculus OX=10090 GN=Rpl7 PE=1 SV=2	P14148	Rpl7	31 kDa		0.024	11	BLM 14 high, PBS low	unknown	8	6	3	8	2	0.5	4	0.5	0.5	0.5	1	1	1	1	1	0	1	0	0	0
234	TRUE	Empty	Isoform 2 of Phosphatidylinositol-binding clathrin assembly protein OS=Mus musculus OX=10090 GN=Picalm	PICAL_MOUSE		?		0.42	1.3	[]	unknown	4	3	6	2	0.5	5	0.5	4	4	2	1	1	1	1	0	1	0	1	1	1
235	TRUE	Empty	Immunoglobulin lambda variable 3 (Fragment) OS=Mus musculus OX=10090 GN=Iglv3 PE=4 SV=1	A0A0B4J1K5	Iglv3	13 kDa		0.039	0.3	BLM 14 low, PBS high	unknown	4	0.5	0.5	5	4	0.5	0.5	5	6	5	1	0	0	1	1	0	0	1	1	1
236.1	TRUE	Empty	Transgelin-2 OS=Mus musculus OX=10090 GN=Tagln2 PE=1 SV=4	Q9WVA4	Tagln2	22 kDa	TRUE	0.75	0.8	[]	unknown	0.5	0.5	8	0.5	0.5	0.5	7	3	7	2	0	0	1	0	0	0	1	1	1	1
210.2	TRUE	Empty	Glutathione S-transferase Mu 2 OS=Mus musculus OX=10090 GN=Gstm2 PE=1 SV=2	P15626	Gstm2	26 kDa	TRUE	0.52	0.7	[]	unknown	2	0.5	7	3	3	0.5	2	6	5	3	1	0	1	1	0.69	0	0.67	0.69	1	0.69
154.3	TRUE	Empty	Isoform 2 of Tropomyosin alpha-1 chain OS=Mus musculus OX=10090 GN=Tpm1	TPM1_MOUSE		?	TRUE	0.37	2	[]	unknown	2	0.5	0.5	0.5	0.5	0.5	22	0.5	0.5	0.5	0.14	0	0	0	0	0	0.75	0	0	0
237	TRUE	Empty	Vacuolar protein sorting-associated protein 29 (Fragment) OS=Mus musculus OX=10090 GN=Vps29 PE=1 SV=1	D3YYD5 (+2)	Vps29	14 kDa		0.1	1.4	[]	unknown	4	3	4	3	4	0.5	6	3	2	3	1	1	1	1	1	0	1	1	1	1
239	TRUE	Empty	Elongin-B OS=Mus musculus OX=10090 GN=Elob PE=1 SV=1	P62869	Elob	13 kDa		0.24	2.2	[]	unknown	4	2	5	2	3	4	7	0.5	4	0.5	1	1	1	1	1	1	1	0	1	0
238	TRUE	Empty	Peptidyl-prolyl cis-trans isomerase B OS=Mus musculus OX=10090 GN=Ppib PE=1 SV=2	P24369	Ppib	24 kDa		0.33	2.5	[]	unknown	5	0.5	7	0.5	0.5	2	4	0.5	4	0.5	1	0	1	0	0	1	1	0	1	0
178.1	TRUE	Empty	Aldehyde dehydrogenase, mitochondrial OS=Mus musculus OX=10090 GN=Aldh2 PE=1 SV=1	A0A0G2JEU1 (+1)	Aldh2	51 kDa	TRUE	0.39	4.9	[]	unknown	2	0.5	17	2	6	0.5	2	0.5	3	0.5	1	0	1	1	1	0	1	0	1	0
240.1	TRUE	Empty	Polypyrimidine tract-binding protein 1 OS=Mus musculus OX=10090 GN=Ptbp1 PE=1 SV=1	Q8BGJ5 (+1)	Ptbp1	57 kDa	TRUE	0.046	9.3	BLM 14 high, PBS low	unknown	2	5	7	6	5	0.5	3	0.5	0.5	0.5	0.89	0.99	0.99	0.98	0.92	0	0.98	0	0	0
178.2	TRUE	Empty	Retinal dehydrogenase 1 OS=Mus musculus OX=10090 GN=Aldh1a1 PE=1 SV=5	P24549	Aldh1a1	54 kDa	TRUE	0.44	5.2	[]	unknown	0.5	0.5	20	0.5	5	0.5	0.5	0.5	3	0.5	0	0	1	0	1	0	0	0	1	0
55.4	TRUE	Empty	Immunoglobulin kappa variable 4-74 (Fragment) OS=Mus musculus OX=10090 GN=Igkv4-74 PE=4 SV=1	A0A0B4J1I3	Igkv4-74	13 kDa	TRUE	0.37	0.2	[]	unknown	0.5	0.5	0.5	0.5	0.5	0.5	0.5	0.5	6	0.5	0	0	0	0	0	0	0	0	1	0
243	TRUE	Empty	Ribosomal protein L36A, pseudogene 1 OS=Mus musculus OX=10090 GN=Rpl36a-ps1 PE=3 SV=1	A0A2I3BPG9 (+1)	Rpl36a-ps1	12 kDa		0.011	3.7	BLM 14 high, PBS low	unknown	4	3	4	3	5	0.5	3	0.5	0.5	2	1	1	1	1	1	0	1	0	0	1
242	TRUE	Empty	40S ribosomal protein S2 OS=Mus musculus OX=10090 GN=Rps2 PE=1 SV=3	P25444	Rps2	31 kDa		0.031	5.7	BLM 14 high, PBS low	unknown	7	3	7	2	3	0.5	2	0.5	2	0.5	1	1	1	1	1	0	0.99	0	1	0
241	TRUE	Empty	Immunoglobulin heavy variable 7-1 (Fragment) OS=Mus musculus OX=10090 GN=Ighv7-1 PE=1 SV=2	A0A075B5S2	Ighv7-1	14 kDa		0.0027	0.08	BLM 14 low, PBS high	unknown	0.5	0.5	0.5	4	0.5	4	3	8	5	6	0	0	0	1	0	1	1	1	1	1
153.2	TRUE	Empty	ATP synthase, H+-transporting, mitochondrial F1 complex, O subunit (Fragment) OS=Mus musculus OX=10090 GN=Atp5o PE=1 SV=1	F6XVM5	Atp5o	8 kDa	TRUE	1	1	[]	unknown	0.5	0.5	0.5	0.5	0.5	0.5	4	0.5	0.5	0.5	0	0	0	0	0	0	0.27	0	0	0
246	TRUE	Empty	Isoform B of Heat shock protein beta-1 OS=Mus musculus OX=10090 GN=Hspb1	HSPB1_MOUSE		?		0.29	1.3	[]	unknown	4	3	5	2	3	0.5	3	4	2	3	1	1	1	1	1	0	1	1	1	1
248	TRUE	Empty	40S ribosomal protein S3a OS=Mus musculus OX=10090 GN=Rps3a PE=1 SV=3	P97351	Rps3a	30 kDa		0.23	2	[]	unknown	9	4	3	0.5	5	0.5	0.5	3	2	3	1	1	1	0	1	0	0	1	1	1
245	TRUE	Empty	E3 ubiquitin-protein ligase HECTD3 OS=Mus musculus OX=10090 GN=Hectd3 PE=1 SV=2	HECD3_MOUSE		?	TRUE	0.15	2.4	[]	unknown	6	2	5	2	3	4	0.5	3	2	0.5	1	1	1	1	1	1	0	1	1	0
249	TRUE	Empty	Complement C1q subcomponent subunit A OS=Mus musculus OX=10090 GN=C1qa PE=1 SV=2	P98086	C1qa	26 kDa		0.039	5.7	BLM 14 high, PBS low	unknown	8	3	6	4	0.5	0.5	3	2	0.5	0.5	1	1	1	1	0	0	1	1	0	0
244	TRUE	Empty	Heterogeneous nuclear ribonucleoprotein K OS=Mus musculus OX=10090 GN=Hnrnpk PE=1 SV=1	B2M1R6 (+1)	Hnrnpk	49 kDa		0.087	5.3	[]	unknown	4	3	9	3	3	0.5	2	0.5	2	0.5	1	1	1	1	1	0	1	0	1	0
247	TRUE	Empty	Indolethylamine N-methyltransferase OS=Mus musculus OX=10090 GN=Inmt PE=1 SV=1	P40936	Inmt	29 kDa		0.05	0.3	BLM 14 low, PBS high	unknown	0.5	0.5	4	0.5	3	0.5	0.5	7	8	4	0	0	1	0	1	0	0	1	1	1
240.2	TRUE	Empty	Polypyrimidine tract-binding protein 1 OS=Mus musculus OX=10090 GN=Ptbp1 PE=1 SV=2	P17225	Ptbp1	56 kDa	TRUE	0.13	8.3	[]	unknown	0.5	5	7	0.5	5	0.5	3	0.5	0.5	0.5	0	0.37	0.37	0	0.33	0	0.3	0	0	0
160.2	TRUE	Empty	AP-1 complex subunit beta-1 OS=Mus musculus OX=10090 GN=Ap1b1 PE=1 SV=2	O35643 (+2)	Ap1b1	104 kDa	TRUE	1	1	[]	unknown	0.5	0.5	0.5	0.5	0.5	0.5	0.5	0.5	0.5	0.5	0	0	0	0	0	0	0	0	0	0
252	TRUE	Empty	40S ribosomal protein S26 OS=Mus musculus OX=10090 GN=Rps26 PE=1 SV=3	P62855	Rps26	13 kDa		0.089	2.7	[]	unknown	6	3	3	4	0.5	0.5	3	0.5	2	2	1	1	1	1	0	0	1	0	1	1
250	TRUE	Empty	Ferritin heavy chain OS=Mus musculus OX=10090 GN=Fth1 PE=1 SV=2	P09528	Fth1	21 kDa		0.1	4.4	[]	unknown	2	10	8	0.5	0.5	0.5	3	2	0.5	2	1	1	1	0	0	0	1	1	0	1
251	TRUE	Empty	Major vault protein OS=Mus musculus OX=10090 GN=Mvp PE=1 SV=4	Q9EQK5	Mvp	96 kDa		1	1	[]	unknown	0.5	0.5	0.5	22	0.5	0.5	5	0.5	0.5	0.5	0	0	0	1	0	0	1	0	0	0
70.5	TRUE	Empty	Isoform 2 of Myosin-14 OS=Mus musculus OX=10090 GN=Myh14	MYH14_MOUSE		?	TRUE	0.23	9	[]	unknown	3	10	0.5	0.5	0.5	0.5	16	0.5	0.5	0.5	0.06	1	0	0	0	0	1	0	0	0
253	TRUE	Empty	40S ribosomal protein S7 OS=Mus musculus OX=10090 GN=Rps7 PE=2 SV=1	P62082	Rps7	22 kDa		0.0065	5.3	BLM 14 high, PBS low	unknown	6	4	6	0.5	3	2	3	2	0.5	0.5	1	1	1	0	1	1	1	0.99	0	0
50.3	TRUE	Empty	Ig heavy chain V-III region E109 OS=Mus musculus OX=10090 PE=1 SV=1	P01798		13 kDa	TRUE	0.54	0.8	[]	unknown	2	3	5	3	0.5	0.5	2	2	6	5	0.24	0.2	1	1	0	0	0.89	1	0.26	0.99
134.2	TRUE	Empty	Immunoglobulin heavy variable 7-2 OS=Mus musculus OX=10090 GN=Ighv7-2 PE=4 SV=1	A0A075B5R3 (+1)	Ighv7-2	13 kDa	TRUE	0.63	0.7	[]	unknown	4	3	0.5	0.5	0.5	0.5	0.5	0.5	6	4	0.07	0.06	0	0	0	0	0	0	0.08	1
240.3	TRUE	Empty	Isoform 2 of Polypyrimidine tract-binding protein 3 OS=Mus musculus OX=10090 GN=Ptbp3	PTBP3_MOUSE		?	TRUE	1	1	[]	unknown	0.5	0.5	0.5	0.5	0.5	0.5	0.5	0.5	0.5	0.5	0	0	0	0	0	0	0	0	0	0
256	TRUE	Empty	Isoform 1 of Cell division control protein 42 homolog OS=Mus musculus OX=10090 GN=Cdc42	CDC42_MOUSE		?	TRUE	0.69	1.4	[]	unknown	3	0.5	7	2	3	2	2	0.5	5	2	1	0	1	1	1	1	0.96	0	1	1
255	TRUE	Empty	Ribosomal protein L19 OS=Mus musculus OX=10090 GN=Rpl19 PE=1 SV=1	A2A547 (+1)	Rpl19	23 kDa		0.87	0.9	[]	unknown	3	0.5	0.5	5	3	0.5	4	2	2	0.5	1	0	0	1	1	0	1	1	1	0
254	TRUE	Empty	Ras-related protein Rab-14 OS=Mus musculus OX=10090 GN=Rab14 PE=1 SV=3	Q91V41	Rab14	24 kDa		0.29	2.9	[]	unknown	0.5	4	7	2	3	2	4	0.5	3	0.5	0	1	1	1	1	1	1	0	1	0
257	TRUE	Empty	40S ribosomal protein S8 OS=Mus musculus OX=10090 GN=Rps8 PE=1 SV=2	P62242	Rps8	24 kDa		0.045	8.7	BLM 14 high, PBS low	unknown	7	3	3	4	0.5	0.5	5	0.5	0.5	0.5	1	1	1	1	0	0	1	0	0	0
258	TRUE	Empty	Immunoglobulin kappa variable 4-53 OS=Mus musculus OX=10090 GN=Igkv4-53 PE=1 SV=1	A0A075B677	Igkv4-53	10 kDa		0.17	0.2	[]	unknown	3	0.5	0.5	5	0.5	0.5	0.5	4	12	3	1	0	0	1	0	0	0	1	1	1
260	TRUE	Empty	Phosphate carrier protein, mitochondrial OS=Mus musculus OX=10090 GN=Slc25a3 PE=1 SV=1	G5E902 (+1)	Slc25a3	40 kDa		0.16	4.3	[]	unknown	2	3	8	3	3	2	0.5	0.5	0.5	2	1	1	1	1	1	1	0	0	0	1
263	TRUE	Empty	Isoform 4 of Advanced glycosylation end product-specific receptor OS=Mus musculus OX=10090 GN=Ager	RAGE_MOUSE		?		0.81	0.8	[]	unknown	0.5	0.5	5	2	4	3	0.5	0.5	5	2	0	0	1	1	1	1	0	0	1	1
264	TRUE	Empty	ADP-ribosylation factor 6 OS=Mus musculus OX=10090 GN=Arf6 PE=1 SV=2	P62331	Arf6	20 kDa	TRUE	0.66	0.8	[]	unknown	3	0.5	4	3	2	0.5	3	3	3	3	1	0	1	0.87	1	0	1	0.99	1	1
261	TRUE	Empty	40S ribosomal protein S15a OS=Mus musculus OX=10090 GN=Rps15a PE=1 SV=2	P62245	Rps15a	15 kDa		0.43	1.8	[]	unknown	5	2	2	3	0.5	0.5	6	4	0.5	0.5	1	1	0.99	1	0	0	1	1	0	0
262	TRUE	Empty	Ras suppressor protein 1 OS=Mus musculus OX=10090 GN=Rsu1 PE=1 SV=1	A2AUR7 (+2)	Rsu1	30 kDa		0.39	1.5	[]	unknown	4	3	6	0.5	2	0.5	0.5	5	3	0.5	1	1	1	0	1	0	0	1	1	0
265	TRUE	Empty	Immunoglobulin heavy variable 2-5 OS=Mus musculus OX=10090 GN=Ighv2-5 PE=4 SV=1	A0A075B5Q3 (+1)	Ighv2-5	13 kDa		0.12	0.2	[]	unknown	0.5	0.5	0.5	0.5	0.5	0.5	0.5	0.5	5	4	0	0	0	0	0	0	0	0	1	1
259.1	TRUE	Empty	Nucleoside diphosphate kinase OS=Mus musculus OX=10090 GN=Gm20390 PE=3 SV=1	E9PZF0	Gm20390	30 kDa	TRUE	0.37	12	[]	unknown	0.5	0.5	17	0.5	0.5	0.5	2	0.5	0.5	0.5	0	0	1	0	0	0	0.9	0	0	0
268	TRUE	Empty	Isoform Cytoplasmic of Phospholipid hydroperoxide glutathione peroxidase OS=Mus musculus OX=10090 GN=Gpx4	GPX4_MOUSE		?		0.28	1.6	[]	unknown	3	4	2	2	0.5	0.5	5	3	2	0.5	1	1	1	0.99	0	0	1	1	1	0
266	TRUE	Empty	60S ribosomal protein L21 OS=Mus musculus OX=10090 GN=Rpl21 PE=1 SV=3	O09167 (+1)	Rpl21	19 kDa		0.012	8.7	BLM 14 high, PBS low	unknown	6	4	3	4	0.5	0.5	0.5	0.5	0.5	0.5	1	1	1	1	0	0	0	0	0	0
267	TRUE	Empty	Ferritin OS=Mus musculus OX=10090 GN=Ftl1 PE=1 SV=1	Q9CPX4	Ftl1	21 kDa		0.15	14	[]	unknown	0.5	7	13	0.5	0.5	0.5	2	0.5	0.5	0.5	0	1	1	0	0	0	1	0	0	0
270	TRUE	Empty	40S ribosomal protein S30 OS=Mus musculus OX=10090 GN=Fau PE=1 SV=1	A0A494B9Z0 (+3)	Fau	7 kDa		0.56	0.6	[]	unknown	3	0.5	0.5	0.5	0.5	3	7	0.5	4	2	1	0	0	0	0	1	1	0	1	1
269	TRUE	Empty	Ras-related protein Rab-11A OS=Mus musculus OX=10090 GN=Rab11a PE=4 SV=1	E9Q3P9 (+3)	Rab11a	17 kDa		0.47	2.6	[]	unknown	2	0.5	13	0.5	0.5	0.5	0.5	2	2	2	1	0	1	0	0	0	0	1	0.97	1
272	TRUE	Empty	Cysteine-rich protein 2 OS=Mus musculus OX=10090 GN=Crip2 PE=1 SV=1	Q9DCT8	Crip2	23 kDa		0.12	0.2	[]	unknown	0.5	0.5	0.5	3	0.5	0.5	0.5	3	0.5	3	0	0	0	0.99	0	0	0	0.98	0	0.98
271	TRUE	Empty	Immunoglobulin kappa variable 9-123 (Fragment) OS=Mus musculus OX=10090 GN=Igkv9-123 PE=4 SV=2	A0A140T8N8	Igkv9-123	13 kDa	TRUE	1	1	[]	unknown	0.5	0.5	0.5	2	0.5	0.5	0.5	0.5	0.5	0.5	0	0	0	1	0	0	0	0	0	0
154.4	TRUE	Empty	Isoform 2 of Tropomyosin beta chain OS=Mus musculus OX=10090 GN=Tpm2	TPM2_MOUSE		?	TRUE	1	1	[]	unknown	0.5	0.5	0.5	0.5	0.5	0.5	0.5	0.5	0.5	0.5	0	0	0	0	0	0	0	0	0	0
275	TRUE	Empty	Volume-regulated anion channel subunit LRRC8A OS=Mus musculus OX=10090 GN=Lrrc8a PE=1 SV=1	Q80WG5	Lrrc8a	94 kDa		0.14	3.7	[]	unknown	3	0.5	2	0.5	6	5	0.5	0.5	0.5	0.5	1	0	1	0	1	1	0	0	0	0
276	TRUE	Empty	Elongator complex protein 4 OS=Mus musculus OX=10090 GN=Elp4 PE=1 SV=2	Q9ER73	Elp4	46 kDa		0.68	1.4	[]	unknown	0.5	4	4	6	3	0.5	0.5	0.5	0.5	5	0	1	1	1	0.99	0	0	0	0	1
274	TRUE	Empty	Superoxide dismutase [Cu-Zn] OS=Mus musculus OX=10090 GN=Sod1 PE=1 SV=2	P08228	Sod1	16 kDa		0.84	0.8	[]	unknown	0.5	0.5	9	0.5	0.5	0.5	0.5	3	6	3	0	0	1	0	0	0	0	1	1	1
273.1	TRUE	Empty	L-lactate dehydrogenase OS=Mus musculus OX=10090 GN=Ldha PE=1 SV=1	A0A1B0GSR9 (+2)	Ldha	35 kDa	TRUE	0.16	4.2	[]	unknown	5	2	10	2	0.5	0.5	0.5	0.5	0.5	3	1	1	1	0.99	0	0	0	0	0	0.98
279	TRUE	Empty	40S ribosomal protein SA OS=Mus musculus OX=10090 GN=Rpsa PE=1 SV=4	P14206	Rpsa	33 kDa		0.35	2.5	[]	unknown	2	0.5	5	5	0.5	2	0.5	0.5	0.5	2	1	0	1	1	0	1	0	0	0	1
278	TRUE	Empty	Kininogen-1 OS=Mus musculus OX=10090 GN=Kng1 PE=1 SV=1	KNG1_MOUSE		?		0.27	12	[]	unknown	3	0.5	15	0.5	0.5	0.5	0.5	0.5	0.5	0.5	1	0	1	0	0	0	0	0	0	0
259.2	TRUE	Empty	Nucleoside diphosphate kinase A OS=Mus musculus OX=10090 GN=Nme1 PE=1 SV=1	P15532 (+1)	Nme1	17 kDa	TRUE	0.37	9.3	[]	unknown	0.5	0.5	13	0.5	0.5	0.5	2	0.5	0.5	0.5	0	0	0.99	0	0	0	0.52	0	0	0
277	TRUE	Empty	Caldesmon 1 OS=Mus musculus OX=10090 GN=Cald1 PE=1 SV=1	E9QA16 (+1)	Cald1	62 kDa		0.37	2.7	[]	unknown	0.5	3	0.5	0.5	0.5	0.5	17	0.5	0.5	0.5	0	1	0	0	0	0	1	0	0	0
286	TRUE	Empty	Protein phosphatase 1 regulatory subunit 12B OS=Mus musculus OX=10090 GN=Ppp1r12b PE=1 SV=2	MYPT2_MOUSE		?		0.26	0.4	[]	unknown	2	0.5	0.5	0.5	3	0.5	2	4	3	0.5	1	0	0	0	1	0	1	1	1	0
285	TRUE	Empty	Elongin-C (Fragment) OS=Mus musculus OX=10090 GN=Eloc PE=1 SV=1	A0A087WQE6 (+1)	Eloc	11 kDa		0.56	2	[]	unknown	5	0.5	0.5	2	0.5	2	6	0.5	2	0.5	1	0	0	1	0	1	1	0	1	0
288	TRUE	Empty	Cytochrome c oxidase subunit NDUFA4 OS=Mus musculus OX=10090 GN=Ndufa4 PE=1 SV=2	Q62425	Ndufa4	9 kDa		0.012	0.2	BLM 14 low, PBS high	unknown	0.5	0.5	0.5	0.5	0.5	2	3	4	2	3	0	0	0	0	0	1	1	1	0.98	1
289	TRUE	Empty	Small nuclear ribonucleoprotein-associated protein B OS=Mus musculus OX=10090 GN=Snrpb PE=1 SV=1	P27048 (+1)	Snrpb	24 kDa		0.033	6.7	BLM 14 high, PBS low	unknown	3	2	5	3	3	0.5	0.5	0.5	0.5	0.5	1	1	1	1	1	0	0	0	0	0
281	TRUE	Empty	60S acidic ribosomal protein P0 OS=Mus musculus OX=10090 GN=Rplp0 PE=1 SV=3	P14869	Rplp0	34 kDa		0.017	4	BLM 14 high, PBS low	unknown	4	3	5	3	0.5	0.5	0.5	2	0.5	0.5	1	1	1	1	0	0	0	1	0	0
280	TRUE	Empty	Fibrinogen alpha chain OS=Mus musculus OX=10090 GN=Fga PE=1 SV=1	FIBA_MOUSE		?		0.059	3	[]	unknown	2	3	4	0.5	0.5	0.5	8	0.5	2	0.5	1	1	1	0	0	0	1	0	1	0
290	TRUE	Empty	Pulmonary surfactant-associated protein B OS=Mus musculus OX=10090 GN=Sftpb PE=1 SV=1	F8WGK6 (+2)	Sftpb	42 kDa		0.12	0.1	[]	unknown	0.5	0.5	0.5	0.5	0.5	2	4	6	6	0.5	0	0	0	0	0	1	1	1	1	0
287	TRUE	Empty	Osteopontin OS=Mus musculus OX=10090 GN=Spp1 PE=1 SV=1	P10923	Spp1	32 kDa		0.033	6.7	BLM 14 high, PBS low	unknown	2	3	5	3	0.5	4	0.5	0.5	0.5	0.5	0.99	1	1	1	0	1	0	0	0	0
283	TRUE	Empty	Junction plakoglobin OS=Mus musculus OX=10090 GN=Jup PE=1 SV=3	Q02257	Jup	82 kDa		0.37	3.3	[]	unknown	0.5	0.5	4	6	3	0.5	4	0.5	0.5	0.5	0	0	1	1	1	0	1	0	0	0
282	TRUE	Empty	Adenylyl cyclase-associated protein 1 OS=Mus musculus OX=10090 GN=Cap1 PE=1 SV=4	P40124	Cap1	52 kDa		0.37	11	[]	unknown	0.5	0.5	16	0.5	0.5	0.5	0.5	0.5	0.5	0.5	0	0	1	0	0	0	0	0	0	0
291	TRUE	Empty	Glutathione S-transferase (Fragment) OS=Mus musculus OX=10090 GN=Gstm5 PE=1 SV=1	E9PVM7 (+1)	Gstm5	26 kDa	TRUE	0.67	1.4	[]	unknown	2	0.5	3	0.5	0.5	0.5	0.5	0.5	0.5	3	0.99	0	0.86	0	0	0	0	0	0	0.81
284	TRUE	Empty	Tropomyosin alpha-4 chain OS=Mus musculus OX=10090 GN=Tpm4 PE=1 SV=3	Q6IRU2	Tpm4	28 kDa	TRUE	0.37	4	[]	unknown	0.5	5	0.5	0.5	0.5	0.5	14	0.5	0.5	0.5	0	0.98	0	0	0	0	1	0	0	0
296	TRUE	Empty	Ras-related protein Rab-5C OS=Mus musculus OX=10090 GN=Rab5c PE=1 SV=2	P35278	Rab5c	23 kDa		0.8	1.2	[]	unknown	0.5	2	4	2	2	0.5	0.5	2	3	0.5	0	1	1	1	1	0	0	1	1	0
295	TRUE	Empty	60S ribosomal protein L27a OS=Mus musculus OX=10090 GN=Rpl27a PE=1 SV=5	P14115	Rpl27a	17 kDa		0.37	2.7	[]	unknown	0.5	0.5	3	0.5	0.5	0.5	5	0.5	0.5	0.5	0	0	1	0	0	0	1	0	0	0
293	TRUE	Empty	60S ribosomal protein L31 OS=Mus musculus OX=10090 GN=Rpl31 PE=1 SV=1	P62900	Rpl31	14 kDa		0.5	1.9	[]	unknown	5	2	0.5	0.5	2	0.5	3	3	0.5	0.5	1	1	0	0	1	0	1	1	0	0
297	TRUE	Empty	RNA transcription, translation and transport factor protein OS=Mus musculus OX=10090 GN=RTRAF PE=1 SV=1	Q9CQE8	RTRAF	28 kDa		0.37	0.2	[]	unknown	0.5	0.5	0.5	3	4	0.5	0.5	5	0.5	0.5	0	0	0	1	1	0	0	1	0	0
294	TRUE	Empty	Isoform 2 of Heterogeneous nuclear ribonucleoprotein M OS=Mus musculus OX=10090 GN=Hnrnpm	HNRPM_MOUSE		?		0.13	5	[]	unknown	0.5	4	3	2	0.5	5	3	0.5	0.5	0.5	0	1	1	1	0	1	1	0	0	0
292.1	TRUE	Empty	40S ribosomal protein S27 (Fragment) OS=Mus musculus OX=10090 GN=Rps27 PE=1 SV=1	A0A0G2JDW7 (+1)	Rps27	9 kDa	TRUE	0.37	2.7	[]	unknown	3	0.5	0.5	0.5	0.5	0.5	0.5	0.5	0.5	0.5	1	0	0	0	0	0	0	0	0	0
292.2	TRUE	Empty	40S ribosomal protein S27-like OS=Mus musculus OX=10090 GN=Rps27l PE=1 SV=3	Q6ZWY3	Rps27l	9 kDa	TRUE	1	1	[]	unknown	0.5	0.5	0.5	0.5	0.5	0.5	3	0.5	0.5	0.5	0	0	0	0	0	0	0.99	0	0	0
226.2	TRUE	Empty	Progranulin (Fragment) OS=Mus musculus OX=10090 GN=Grn PE=1 SV=1	H3BJE0	Grn	27 kDa	TRUE	1	1	[]	unknown	0.5	0.5	0.5	0.5	0.5	0.5	0.5	0.5	0.5	0.5	0	0	0	0	0	0	0	0	0	0
302	TRUE	Empty	Fibrinogen gamma chain OS=Mus musculus OX=10090 GN=Fgg PE=1 SV=1	Q3UER8 (+1)	Fgg	50 kDa		0.12	5.7	[]	unknown	4	0.5	4	0.5	0.5	0.5	0.5	0.5	0.5	0.5	1	0	1	0	0	0	0	0	0	0
301	TRUE	Empty	GTP-binding nuclear protein Ran OS=Mus musculus OX=10090 GN=Ran PE=1 SV=3	P62827	Ran	24 kDa		0.77	1.3	[]	unknown	0.5	0.5	5	3	4	0.5	0.5	2	0.5	2	0	0	1	1	1	0	0	1	0	1
300	TRUE	Empty	Annexin A2 OS=Mus musculus OX=10090 GN=Anxa2 PE=1 SV=2	P07356	Anxa2	39 kDa		0.12	4.3	[]	unknown	0.5	3	3	4	5	0.5	2	0.5	0.5	0.5	0	1	1	1	1	0	1	0	0	0
305	TRUE	Empty	Protein S100-A9 OS=Mus musculus OX=10090 GN=S100a9 PE=1 SV=3	P31725	S100a9	13 kDa		0.56	2	[]	unknown	0.5	0.5	5	0.5	0.5	0.5	2	2	0.5	0.5	0	0	1	0	0	0	0.99	1	0	0
304	TRUE	Empty	Myeloid-associated differentiation marker (Fragment) OS=Mus musculus OX=10090 GN=Myadm PE=1 SV=1	A0A0N4SW94	Myadm	9 kDa		0.13	5	[]	unknown	0.5	3	4	2	7	0.5	0.5	0.5	0.5	0.5	0	1	1	1	1	0	0	0	0	0
303	TRUE	Empty	Protein disulfide-isomerase A6 OS=Mus musculus OX=10090 GN=Pdia6 PE=1 SV=3	Q922R8	Pdia6	48 kDa		0.17	8.3	[]	unknown	0.5	4	8	2	0.5	0.5	0.5	0.5	0.5	0.5	0	1	1	1	0	0	0	0	0	0
299	TRUE	Empty	Immunoglobulin kappa variable 1-132 (Fragment) OS=Mus musculus OX=10090 GN=Igkv1-132 PE=4 SV=1	A0A0B4J1H9	Igkv1-132	13 kDa		0.58	0.5	[]	unknown	5	0.5	0.5	0.5	0.5	0.5	0.5	2	0.5	9	1	0	0	0	0	0	0	1	0	1
307	TRUE	Empty	Ras-related protein Rab-7a OS=Mus musculus OX=10090 GN=Rab7a PE=1 SV=2	P51150	Rab7a	23 kDa		0.13	2.8	[]	unknown	2	4	5	0.5	0.5	0.5	0.5	0.5	3	0.5	1	1	1	0	0	0	0	0	1	0
114.2	TRUE	Empty	Trypsin 10 OS=Mus musculus OX=10090 GN=Try10 PE=1 SV=1	Q792Z1	Try10	26 kDa	TRUE	0.37	0.3	[]	unknown	0.5	0.5	0.5	0.5	0.5	0.5	0.5	0.5	0.5	4	0	0	0	0	0	0	0	0	0	1
308	TRUE	Empty	Protein MEMO1 OS=Mus musculus OX=10090 GN=Memo1 PE=1 SV=1	Q91VH6	Memo1	34 kDa		0.19	3.5	[]	unknown	5	0.5	5	0.5	0.5	0.5	0.5	2	0.5	0.5	1	0	1	0	0	0	0	0.99	0	0
309	TRUE	Empty	Immunoglobulin heavy variable V1-67 OS=Mus musculus OX=10090 GN=Ighv1-67 PE=4 SV=1	A0A075B5X6 (+1)	Ighv1-67	11 kDa		1	1	[]	unknown	0.5	0.5	0.5	0.5	0.5	4	0.5	0.5	0.5	0.5	0	0	0	0	0	1	0	0	0	0
310.1	TRUE	Empty	Microtubule-associated protein 1B OS=Mus musculus OX=10090 GN=Map1b PE=1 SV=2	P14873	Map1b	270 kDa	TRUE	0.61	1.5	[]	unknown	6	0.5	2	0.5	0.5	0.5	0.5	0.5	2	3	1	0	0.99	0	0	0	0	0	1	1
306	TRUE	Empty	Leucine-rich repeat-containing protein 59 OS=Mus musculus OX=10090 GN=Lrrc59 PE=1 SV=1	Q922Q8	Lrrc59	35 kDa		0.011	10	BLM 14 high, PBS low	unknown	4	4	7	2	0.5	0.5	0.5	0.5	0.5	0.5	1	1	1	1	0	0	0	0	0	0
318	TRUE	Empty	Ras-related protein Rap-1A OS=Mus musculus OX=10090 GN=Rap1a PE=1 SV=1	A0A0G2JDL9 (+2)	Rap1a	13 kDa		0.52	1.6	[]	unknown	3	0.5	3	0.5	0.5	0.5	0.5	3	0.5	0.5	1	0	1	0	0	0	0	1	0	0
319	TRUE	Empty	Calnexin OS=Mus musculus OX=10090 GN=Canx PE=1 SV=1	P35564	Canx	67 kDa		0.37	0.5	[]	unknown	0.5	0.5	0.5	3	3	2	0.5	0.5	0.5	2	0	0	0	1	1	1	0	0	0	1
317	TRUE	Empty	Antithrombin-III (Fragment) OS=Mus musculus OX=10090 GN=Serpinc1 PE=1 SV=1	A0A0A6YWH7	Serpinc1	32 kDa		0.89	1.1	[]	unknown	3	0.5	4	2	0.5	0.5	0.5	2	3	2	1	0	1	1	0	0	0	1	1	1
315	TRUE	Empty	Pyruvate dehydrogenase protein X component, mitochondrial OS=Mus musculus OX=10090 GN=Pdhx PE=1 SV=1	Q8BKZ9	Pdhx	54 kDa		0.12	0.1	[]	unknown	0.5	0.5	0.5	0.5	0.5	0.5	2	0.5	5	6	0	0	0	0	0	0	1	0	1	1
320	TRUE	Empty	Adhesion G-protein-coupled receptor V1 OS=Mus musculus OX=10090 GN=Adgrv1 PE=3 SV=1	B8JJE0	Adgrv1	688 kDa		0.37	2	[]	unknown	2	0.5	0.5	0.5	0.5	0.5	0.5	0.5	0.5	0.5	0.94	0	0	0	0	0	0	0	0	0
314	TRUE	Empty	Elongation factor 2 OS=Mus musculus OX=10090 GN=Eef2 PE=1 SV=2	P58252	Eef2	95 kDa		0.25	6.3	[]	unknown	2	0.5	7	0.5	0.5	0.5	2	0.5	0.5	0.5	1	0	1	0	0	0	1	0	0	0
321.1	TRUE	Empty	Copine-3 OS=Mus musculus OX=10090 GN=Cpne3 PE=1 SV=2	Q8BT60	Cpne3	60 kDa	TRUE	0.18	4.3	[]	unknown	4	0.5	2	0.5	0.5	0.5	5	0.5	0.5	0.5	1	0	1	0	0	0	1	0	0	0
313	TRUE	Empty	Annexin A5 OS=Mus musculus OX=10090 GN=Anxa5 PE=1 SV=1	P48036	Anxa5	36 kDa		0.37	8.7	[]	unknown	0.5	0.5	12	0.5	0.5	0.5	0.5	0.5	0.5	0.5	0	0	1	0	0	0	0	0	0	0
316	TRUE	Empty	Cytoskeleton-associated protein 4 OS=Mus musculus OX=10090 GN=Ckap4 PE=1 SV=2	Q8BMK4	Ckap4	64 kDa		0.12	7.7	[]	unknown	0.5	5	6	2	0.5	2	0.5	0.5	0.5	0.5	0	1	1	1	0	1	0	0	0	0
312	TRUE	Empty	Galectin-3 OS=Mus musculus OX=10090 GN=Lgals3 PE=1 SV=3	P16110 (+1)	Lgals3	28 kDa		0.14	7	[]	unknown	4	0.5	6	2	0.5	0.5	0.5	0.5	0.5	0.5	1	0	1	1	0	0	0	0	0	0
311	TRUE	Empty	Lymphocyte-specific protein 1 OS=Mus musculus OX=10090 GN=Lsp1 PE=1 SV=1	A2A6J4	Lsp1	36 kDa		0.37	3.3	[]	unknown	0.5	4	0.5	0.5	0.5	0.5	12	0.5	0.5	0.5	0	1	0	0	0	0	1	0	0	0
326	TRUE	Empty	Prothrombin OS=Mus musculus OX=10090 GN=F2 PE=1 SV=1	H7BX99 (+1)	F2	70 kDa		0.8	1.2	[]	unknown	4	2	0.5	0.5	2	0.5	0.5	3	0.5	2	1	1	0	0	1	0	0	1	0	1
324	TRUE	Empty	Calponin-2 OS=Mus musculus OX=10090 GN=Cnn2 PE=1 SV=1	Q08093	Cnn2	33 kDa		0.37	4	[]	unknown	0.5	0.5	5	2	0.5	0.5	3	0.5	0.5	0.5	0	0	1	1	0	0	1	0	0	0
322	TRUE	Empty	Transforming protein RhoA (Fragment) OS=Mus musculus OX=10090 GN=Rhoa PE=1 SV=1	A0A0A6YXF6 (+1)	Rhoa	19 kDa		0.27	7.7	[]	unknown	2	0.5	9	0.5	0.5	0.5	0.5	0.5	0.5	0.5	1	0	1	0	0	0	0	0	0	0
323	TRUE	Empty	Pregnancy zone protein OS=Mus musculus OX=10090 GN=Pzp PE=1 SV=3	Q61838	Pzp	166 kDa		0.86	0.9	[]	unknown	2	2	2	0.5	0.5	0.5	0.5	0.5	0.5	6	1	0.98	1	0	0	0	0	0	0	1
325	TRUE	Empty	Glutathione S-transferase A3 OS=Mus musculus OX=10090 GN=Gsta3 PE=1 SV=2	P30115	Gsta3	25 kDa	TRUE	0.56	2.2	[]	unknown	0.5	0.5	9	0.5	0.5	0.5	0.5	2	2	0.5	0	0	1	0	0	0	0	0.96	0.93	0
329	TRUE	Empty	ATP synthase subunit gamma OS=Mus musculus OX=10090 GN=Atp5c1 PE=1 SV=1	A2AKU9 (+1)	Atp5c1	33 kDa		0.031	5.3	BLM 14 high, PBS low	unknown	2	2	4	0.5	0.5	0.5	0.5	0.5	0.5	0.5	1	1	1	0	0	0	0	0	0	0
332	TRUE	Empty	Ribosomal protein L15 (Fragment) OS=Mus musculus OX=10090 GN=Rpl15 PE=1 SV=1	B8JKK2	Rpl15	13 kDa		0.37	2.7	[]	unknown	0.5	3	0.5	0.5	0.5	0.5	0.5	0.5	0.5	0.5	0	1	0	0	0	0	0	0	0	0
335	TRUE	Empty	EH domain-containing protein 2 OS=Mus musculus OX=10090 GN=Ehd2 PE=1 SV=1	Q8BH64	Ehd2	61 kDa	TRUE	0.091	2.3	[]	unknown	2	2	3	0.5	0.5	0.5	0.5	0.5	2	0.5	0.99	0.94	0.99	0	0	0	0	0	0.97	0
333	TRUE	Empty	Peroxiredoxin-4 OS=Mus musculus OX=10090 GN=Prdx4 PE=1 SV=1	O08807	Prdx4	31 kDa	TRUE	0.12	6.3	[]	unknown	5	0.5	4	0.5	0.5	0.5	0.5	0.5	0.5	0.5	0.87	0	1	0	0	0	0	0	0	0
334	TRUE	Empty	Transthyretin OS=Mus musculus OX=10090 GN=Ttr PE=1 SV=1	P07309	Ttr	16 kDa		0.37	0.5	[]	unknown	0.5	0.5	0.5	0.5	0.5	3	0.5	0.5	2	0.5	0	0	0	0	0	1	0	0	1	0
327	TRUE	Empty	Immunoglobulin heavy variable 7-4 OS=Mus musculus OX=10090 GN=Ighv7-4 PE=4 SV=1	A0A075B5S5 (+1)	Ighv7-4	13 kDa	TRUE	0.37	0.2	[]	unknown	0.5	0.5	0.5	0.5	0.5	3	0.5	0.5	8	0.5	0	0	0	0	0	1	0	0	1	0
331	TRUE	Empty	Chloride intracellular channel protein 4 OS=Mus musculus OX=10090 GN=Clic4 PE=1 SV=3	Q9QYB1	Clic4	29 kDa	TRUE	0.48	3	[]	unknown	0.5	0.5	8	0.5	0.5	0.5	0.5	2	0.5	0.5	0	0	1	0	0	0	0	0.95	0	0
26.3	TRUE	Empty	Tubulin alpha chain-like 3 OS=Mus musculus OX=10090 GN=Tubal3 PE=2 SV=2	Q3UX10	Tubal3	50 kDa	TRUE	0.37	2	[]	unknown	0.5	2	0.5	3	0.5	0.5	3	0.5	0.5	0.5	0	0.49	0	0.53	0	0	0.63	0	0	0
336	TRUE	Empty	Ig heavy chain V region 23 OS=Mus musculus OX=10090 PE=4 SV=1	P01748		13 kDa	TRUE	0.37	0.2	[]	unknown	0.5	0.5	0.5	0.5	0.5	0.5	0.5	0.5	0.5	5	0	0	0	0	0	0	0	0	0	0.98
328	TRUE	Empty	Immunoglobulin heavy constant alpha (Fragment) OS=Mus musculus OX=10090 GN=Igha PE=1 SV=1	A0A075B6A3	Igha	37 kDa		0.25	0.1	[]	unknown	0.5	0.5	0.5	0.5	0.5	0.5	0.5	12	0.5	3	0	0	0	0	0	0	0	1	0	1
337	TRUE	Empty	Ras-related protein Rab-10 OS=Mus musculus OX=10090 GN=Rab10 PE=1 SV=1	P61027	Rab10	23 kDa	TRUE	0.83	1.2	[]	unknown	0.5	0.5	4	0.5	0.5	0.5	0.5	3	0.5	0.5	0	0	0.8	0	0	0	0	0.93	0	0
330	TRUE	Empty	Hemopexin OS=Mus musculus OX=10090 GN=Hpx PE=1 SV=2	Q91X72	Hpx	51 kDa		0.37	10	[]	unknown	0.5	0.5	14	0.5	0.5	0.5	0.5	0.5	0.5	0.5	0	0	1	0	0	0	0	0	0	0
340	TRUE	Empty	Calpain small subunit 1 OS=Mus musculus OX=10090 GN=Capns1 PE=1 SV=1	A0A0R4IZW8 (+2)	Capns1	28 kDa		0.56	1.6	[]	unknown	4	0.5	2	0.5	0.5	0.5	0.5	3	0.5	0.5	1	0	1	0	0	0	0	1	0	0
342	TRUE	Empty	60S ribosomal protein L35 OS=Mus musculus OX=10090 GN=Rpl35 PE=1 SV=1	Q6ZWV7	Rpl35	15 kDa		0.75	1.3	[]	unknown	3	0.5	0.5	0.5	0.5	2	2	0.5	0.5	2	1	0	0	0	0	1	1	0	0	1
345.1	TRUE	Empty	Myotubularin-related protein 3 OS=Mus musculus OX=10090 GN=Mtmr3 PE=1 SV=1	B1ATD5 (+1)	Mtmr3	130 kDa	TRUE	0.37	2.7	[]	unknown	3	0.5	0.5	0.5	3	3	0.5	0.5	0.5	0.5	1	0	0	0	0.98	1	0	0	0	0
343	TRUE	Empty	Isoform Short of Serine/arginine-rich splicing factor 3 OS=Mus musculus OX=10090 GN=Srsf3	SRSF3_MOUSE		?		0.0053	4.7	BLM 14 high, PBS low	unknown	2	2	3	3	0.5	0.5	0.5	0.5	0.5	0.5	1	0.97	1	1	0	0	0	0	0	0
341	TRUE	Empty	Periaxin OS=Mus musculus OX=10090 GN=Prx PE=1 SV=1	PRAX_MOUSE		?		0.0029	0.2	BLM 14 low, PBS high	unknown	0.5	0.5	0.5	0.5	3	0.5	2	3	3	2	0	0	0	0	1	0	0.99	1	1	1
344	TRUE	Empty	Collagen alpha-1(XIV) chain OS=Mus musculus OX=10090 GN=Col14a1 PE=1 SV=1	B7ZNH7 (+2)	Col14a1	193 kDa		0.75	1.3	[]	unknown	3	0.5	0.5	0.5	0.5	0.5	4	0.5	0.5	2	1	0	0	0	0	0	1	0	0	1
338	TRUE	Empty	Glutathione S-transferase P 1 (Fragment) OS=Mus musculus OX=10090 GN=Gstp1 PE=1 SV=1	A0A494B908 (+1)	Gstp1	18 kDa		0.084	8	[]	unknown	7	2	3	0.5	0.5	0.5	0.5	0.5	0.5	0.5	1	1	1	0	0	0	0	0	0	0
339	TRUE	Empty	ATP synthase subunit beta, mitochondrial OS=Mus musculus OX=10090 GN=Atp5f1b PE=1 SV=2	P56480	Atp5f1b	56 kDa		0.37	6.7	[]	unknown	0.5	0.5	9	0.5	2	0.5	0.5	0.5	0.5	0.5	0	0	1	0	1	0	0	0	0	0
298.1	TRUE	Empty	EH domain-containing protein 1 OS=Mus musculus OX=10090 GN=Ehd1 PE=1 SV=1	Q9WVK4	Ehd1	61 kDa	TRUE	0.36	2.2	[]	unknown	0.5	2	4	0.5	2	0.5	0.5	0.5	2	0.5	0	0.41	0.98	0	0.93	0	0	0	0.47	0
9.11	TRUE	Empty	Isoform 2 of Keratin-like protein KRT222 OS=Mus musculus OX=10090 GN=Krt222	KT222_MOUSE		?	TRUE	1	1	[]	unknown	0.5	0.5	0.5	0.5	0.5	0.5	0.5	0.5	0.5	0.5	0	0	0	0	0	0	0	0	0	0
356	TRUE	Empty	Complement C5 OS=Mus musculus OX=10090 GN=C5 PE=1 SV=2	P06684	C5	189 kDa		0.37	2	[]	unknown	0.5	2	0.5	2	0.5	0.5	0.5	0.5	0.5	0.5	0	1	0	1	0	0	0	0	0	0
355	TRUE	Empty	Isoform 3 of F-actin-capping protein subunit beta OS=Mus musculus OX=10090 GN=Capzb	CAPZB_MOUSE		?		1	1	[]	unknown	2	0.5	0.5	0.5	0.5	0.5	2	0.5	2	0.5	1	0	0	0	0	0	1	0	1	0
351	TRUE	Empty	Isoform 2 of 60S ribosomal protein L22-like 1 OS=Mus musculus OX=10090 GN=Rpl22l1	RL22L_MOUSE		?		0.067	6	[]	unknown	5	2	2	0.5	0.5	0.5	2	0.5	0.5	0.5	1	1	1	0	0	0	1	0	0	0
353	TRUE	Empty	Ras GTPase-activating protein-binding protein 2 OS=Mus musculus OX=10090 GN=G3bp2 PE=1 SV=2	G3BP2_MOUSE		?		0.37	2	[]	unknown	0.5	2	0.5	0.5	0.5	5	0.5	0.5	0.5	0.5	0	1	0	0	0	1	0	0	0	0
354	TRUE	Empty	Cytochrome c oxidase subunit 2 OS=Mus musculus OX=10090 GN=Mtco2 PE=1 SV=1	P00405	Mtco2	26 kDa		0.12	3	[]	unknown	0.5	2	2	0.5	0.5	0.5	0.5	0.5	0.5	0.5	0	0.99	1	0	0	0	0	0	0	0
352	TRUE	Empty	Actin-related protein 2/3 complex subunit 5 OS=Mus musculus OX=10090 GN=Arpc5 PE=1 SV=3	Q9CPW4	Arpc5	16 kDa		0.37	2	[]	unknown	0.5	0.5	2	0.5	0.5	0.5	7	0.5	0.5	0.5	0	0	1	0	0	0	1	0	0	0
347	TRUE	Empty	Myosin light chain 4 OS=Mus musculus OX=10090 GN=Myl4 PE=1 SV=3	P09541	Myl4	21 kDa	TRUE	1	1	[]	unknown	0.5	0.5	0.5	0.5	0.5	0.5	11	0.5	0.5	0.5	0	0	0	0	0	0	1	0	0	0
349	TRUE	Empty	Serotransferrin OS=Mus musculus OX=10090 GN=Tf PE=1 SV=1	Q921I1	Tf	77 kDa		0.37	8	[]	unknown	0.5	0.5	11	0.5	0.5	0.5	0.5	0.5	0.5	0.5	0	0	1	0	0	0	0	0	0	0
350	TRUE	Empty	Aquaporin-5 OS=Mus musculus OX=10090 GN=Aqp5 PE=1 SV=1	Q9WTY4	Aqp5	28 kDa		0.37	2.7	[]	unknown	0.5	3	0.5	0.5	0.5	0.5	9	0.5	0.5	0.5	0	1	0	0	0	0	1	0	0	0
348	TRUE	Empty	Alpha-enolase OS=Mus musculus OX=10090 GN=Eno1 PE=1 SV=3	P17182	Eno1	47 kDa		0.37	7.3	[]	unknown	0.5	0.5	10	0.5	0.5	0.5	0.5	0.5	0.5	0.5	0	0	1	0	0	0	0	0	0	0
346	TRUE	Empty	Glucose-6-phosphate isomerase OS=Mus musculus OX=10090 GN=Gpi PE=1 SV=4	P06745	Gpi	63 kDa		0.37	9.3	[]	unknown	0.5	0.5	13	0.5	0.5	0.5	0.5	0.5	0.5	0.5	0	0	1	0	0	0	0	0	0	0
2.26	TRUE	Empty	Neurofilament medium polypeptide OS=Mus musculus OX=10090 GN=Nefm PE=1 SV=1	A0A0R4J036 (+1)	Nefm	96 kDa	TRUE	1	1	[]	unknown	0.5	0.5	0.5	0.5	0.5	0.5	0.5	0.5	0.5	0.5	0	0	0	0	0	0	0	0	0	0
2.27	TRUE	Empty	Alpha-internexin OS=Mus musculus OX=10090 GN=Ina PE=1 SV=3	P46660	Ina	55 kDa	TRUE	1	1	[]	unknown	0.5	0.5	0.5	0.5	0.5	0.5	0.5	0.5	0.5	0.5	0	0	0	0	0	0	0	0	0	0
363	TRUE	Empty	Serine/threonine-protein phosphatase 2A 65 kDa regulatory subunit A alpha isoform OS=Mus musculus OX=10090 GN=Ppp2r1a PE=1 SV=3	Q76MZ3	Ppp2r1a	65 kDa		0.12	3	[]	unknown	0.5	2	2	0.5	2	3	0.5	0.5	0.5	0.5	0	1	1	0	1	1	0	0	0	0
364	TRUE	Empty	Small nuclear ribonucleoprotein Sm D3 OS=Mus musculus OX=10090 GN=Snrpd3 PE=1 SV=1	P62320	Snrpd3	14 kDa		0.37	3.3	[]	unknown	0.5	0.5	4	0.5	0.5	0.5	0.5	0.5	0.5	0.5	0	0	1	0	0	0	0	0	0	0
367	TRUE	Empty	Peptidyl-prolyl cis-trans isomerase F, mitochondrial OS=Mus musculus OX=10090 GN=Ppif PE=1 SV=1	Q99KR7	Ppif	22 kDa	TRUE	0.83	1.2	[]	unknown	0.5	0.5	4	0.5	0.5	0.5	2	0.5	3	0.5	0	0	0.89	0	0	0	0.98	0	0.99	0
365	TRUE	Empty	Ras-related protein R-Ras OS=Mus musculus OX=10090 GN=Rras PE=1 SV=1	P10833	Rras	24 kDa	TRUE	0.21	0.5	[]	unknown	3	0.5	0.5	0.5	0.5	0.5	0.5	3	3	2	1	0	0	0	0	0	0	0.99	1	0.98
361	TRUE	Empty	Ribosomal biogenesis factor OS=Mus musculus OX=10090 GN=Rbis PE=1 SV=2	RBIS_MOUSE		?		0.52	2.3	[]	unknown	6	0.5	0.5	0.5	0.5	0.5	2	2	0.5	0.5	1	0	0	0	0	0	0.96	1	0	0
360	TRUE	Empty	Golgi-associated plant pathogenesis-related protein 1 OS=Mus musculus OX=10090 GN=Glipr2 PE=1 SV=3	Q9CYL5	Glipr2	17 kDa		0.14	3.7	[]	unknown	2	3	0.5	0.5	0.5	0.5	6	0.5	0.5	0.5	1	1	0	0	0	0	1	0	0	0
358	TRUE	Empty	Transgelin OS=Mus musculus OX=10090 GN=Tagln PE=1 SV=3	P37804	Tagln	23 kDa		0.37	6.7	[]	unknown	0.5	0.5	9	0.5	0.5	0.5	0.5	0.5	0.5	0.5	0	0	1	0	0	0	0	0	0	0
362	TRUE	Empty	MLV-related proviral Env polyprotein OS=Mus musculus OX=10090 PE=1 SV=3	P10404		70 kDa		1	1	[]	unknown	0.5	0.5	0.5	8	0.5	0.5	0.5	0.5	0.5	0.5	0	0	0	1	0	0	0	0	0	0
359	TRUE	Empty	Enoyl-CoA hydratase, mitochondrial OS=Mus musculus OX=10090 GN=Echs1 PE=1 SV=1	Q8BH95	Echs1	31 kDa		0.71	1.6	[]	unknown	0.5	0.5	7	0.5	0.5	0.5	0.5	0.5	0.5	4	0	0	1	0	0	0	0	0	0	1
366	TRUE	Empty	Dihydropyrimidinase-related protein 3 OS=Mus musculus OX=10090 GN=Dpysl3 PE=1 SV=1	Q3TT92 (+1)	Dpysl3	62 kDa	TRUE	0.37	3.3	[]	unknown	0.5	0.5	4	0.5	0.5	0.5	0.5	0.5	0.5	0.5	0	0	1	0	0	0	0	0	0	0
357	TRUE	Empty	Isoform M1 of Pyruvate kinase PKM OS=Mus musculus OX=10090 GN=Pkm	KPYM_MOUSE		?		0.37	8	[]	unknown	0.5	0.5	11	0.5	0.5	0.5	0.5	0.5	0.5	0.5	0	0	1	0	0	0	0	0	0	0
222.2	TRUE	Empty	Carboxylesterase 1C OS=Mus musculus OX=10090 GN=Ces1c PE=1 SV=4	P23953	Ces1c	61 kDa	TRUE	0.37	3.3	[]	unknown	0.5	0.5	4	0.5	0.5	0.5	0.5	0.5	0.5	0.5	0	0	0.96	0	0	0	0	0	0	0
379	TRUE	Empty	Small nuclear ribonucleoprotein Sm D2 OS=Mus musculus OX=10090 GN=Snrpd2 PE=1 SV=1	P62317	Snrpd2	14 kDa		1	1	[]	unknown	0.5	0.5	0.5	0.5	0.5	0.5	2	0.5	0.5	0.5	0	0	0	0	0	0	1	0	0	0
370	TRUE	Empty	Isoform 2 of 60 kDa heat shock protein, mitochondrial OS=Mus musculus OX=10090 GN=Hspd1	CH60_MOUSE		?		0.63	1.7	[]	unknown	0.5	0.5	4	0.5	0.5	0.5	0.5	2	0.5	0.5	0	0	1	0	0	0	0	1	0	0
377	TRUE	Empty	Cilia- and flagella-associated protein 410 OS=Mus musculus OX=10090 GN=Cfap410 PE=1 SV=1	Q8C6G1	Cfap410	28 kDa		1	1	[]	unknown	0.5	0.5	3	0.5	0.5	0.5	0.5	0.5	0.5	3	0	0	1	0	0	0	0	0	0	1
378	TRUE	Empty	Isoform 2 of Reticulon-3 OS=Mus musculus OX=10090 GN=Rtn3	RTN3_MOUSE		?		0.031	5.3	BLM 14 high, PBS low	unknown	2	2	4	0.5	0.5	0.5	0.5	0.5	0.5	0.5	1	1	1	0	0	0	0	0	0	0
375	TRUE	Empty	Glutathione S-transferase kappa 1 OS=Mus musculus OX=10090 GN=Gstk1 PE=1 SV=3	Q9DCM2	Gstk1	26 kDa		0.37	3.3	[]	unknown	0.5	0.5	4	0.5	0.5	0.5	0.5	0.5	0.5	0.5	0	0	1	0	0	0	0	0	0	0
372	TRUE	Empty	Galectin-1 OS=Mus musculus OX=10090 GN=Lgals1 PE=1 SV=3	P16045	Lgals1	15 kDa		0.23	5.7	[]	unknown	2	0.5	6	0.5	0.5	0.5	0.5	0.5	0.5	0.5	1	0	1	0	0	0	0	0	0	0
376	TRUE	Empty	Protein/nucleic acid deglycase DJ-1 OS=Mus musculus OX=10090 GN=Park7 PE=1 SV=1	Q99LX0	Park7	20 kDa		0.52	2.3	[]	unknown	0.5	0.5	6	0.5	0.5	0.5	2	2	0.5	0.5	0	0	1	0	0	0	0.99	0.99	0	0
374	TRUE	Empty	Sorcin OS=Mus musculus OX=10090 GN=Sri PE=1 SV=1	SORCN_MOUSE		?		0.56	2	[]	unknown	0.5	0.5	5	0.5	0.5	0.5	3	2	0.5	0.5	0	0	1	0	0	0	1	1	0	0
369	TRUE	Empty	Peroxiredoxin (Fragment) OS=Mus musculus OX=10090 GN=Prdx5 PE=1 SV=1	A0A494BAZ4 (+1)	Prdx5	15 kDa		0.81	1.3	[]	unknown	0.5	0.5	6	0.5	0.5	0.5	0.5	2	3	0.5	0	0	1	0	0	0	0	0.98	1	0
373	TRUE	Empty	60S ribosomal protein L7a OS=Mus musculus OX=10090 GN=Rpl7a PE=1 SV=2	P12970	Rpl7a	30 kDa		0.12	6.3	[]	unknown	4	5	0.5	0.5	0.5	0.5	0.5	0.5	0.5	0.5	1	1	0	0	0	0	0	0	0	0
371	TRUE	Empty	Plastin-2 OS=Mus musculus OX=10090 GN=Lcp1 PE=1 SV=4	Q61233	Lcp1	70 kDa	TRUE	0.37	4.7	[]	unknown	0.5	0.5	6	0.5	0.5	0.5	0.5	0.5	0.5	0.5	0	0	1	0	0	0	0	0	0	0
368.1	TRUE	Empty	Plastin-3 (Fragment) OS=Mus musculus OX=10090 GN=Pls3 PE=1 SV=1	A0A1C7CYV0 (+1)	Pls3	71 kDa	TRUE	1	1	[]	unknown	0.5	0.5	0.5	0.5	0.5	0.5	7	0.5	0.5	0.5	0	0	0	0	0	0	1	0	0	0
222.3	TRUE	Empty	Carboxylic ester hydrolase OS=Mus musculus OX=10090 GN=Ces1a PE=1 SV=1	E9PYP1	Ces1a	62 kDa	TRUE	1	1	[]	unknown	0.5	0.5	0.5	0.5	0.5	0.5	0.5	0.5	0.5	0.5	0	0	0	0	0	0	0	0	0	0
222.4	TRUE	Empty	Liver carboxylesterase 1 OS=Mus musculus OX=10090 GN=Ces1 PE=1 SV=1	Q8VCC2	Ces1	63 kDa	TRUE	1	1	[]	unknown	0.5	0.5	0.5	0.5	0.5	0.5	0.5	0.5	0.5	0.5	0	0	0	0	0	0	0	0	0	0
385	TRUE	Empty	Acp1 protein OS=Mus musculus OX=10090 GN=Acp1 PE=1 SV=1	Q561M1 (+1)	Acp1	18 kDa		0.37	2	[]	unknown	0.5	0.5	2	0.5	0.5	0.5	0.5	0.5	0.5	0.5	0	0	1	0	0	0	0	0	0	0
390	TRUE	Empty	Dynein light chain 2, cytoplasmic OS=Mus musculus OX=10090 GN=Dynll2 PE=1 SV=1	Q9D0M5	Dynll2	10 kDa		0.12	0.3	[]	unknown	0.5	0.5	0.5	0.5	0.5	0.5	0.5	2	0.5	2	0	0	0	0	0	0	0	1	0	1
391	TRUE	Empty	Cytochrome P450 2F2 OS=Mus musculus OX=10090 GN=Cyp2f2 PE=1 SV=1	P33267	Cyp2f2	56 kDa		0.37	0.5	[]	unknown	0.5	0.5	0.5	0.5	0.5	0.5	0.5	0.5	2	0.5	0	0	0	0	0	0	0	0	0.99	0
388	TRUE	Empty	Volume-regulated anion channel subunit LRRC8D OS=Mus musculus OX=10090 GN=Lrrc8d PE=1 SV=1	Q8BGR2	Lrrc8d	98 kDa		0.37	2	[]	unknown	2	0.5	0.5	0.5	0.5	4	0.5	0.5	0.5	0.5	0.99	0	0	0	0	1	0	0	0	0
298.2	TRUE	Empty	EH domain-containing protein 4 OS=Mus musculus OX=10090 GN=Ehd4 PE=1 SV=1	Q9EQP2	Ehd4	61 kDa	TRUE	0.75	1.3	[]	unknown	0.5	0.5	3	0.5	2	0.5	0.5	2	0.5	0.5	0	0	0.99	0	0.94	0	0	1	0	0
386	TRUE	Empty	Desmoglein-1-alpha OS=Mus musculus OX=10090 GN=Dsg1a PE=2 SV=2	Q61495	Dsg1a	115 kDa		1	1	[]	unknown	0.5	0.5	0.5	4	0.5	0.5	2	0.5	0.5	0.5	0	0	0	1	0	0	1	0	0	0
387	TRUE	Empty	Glutathione peroxidase OS=Mus musculus OX=10090 GN=Gpx1 PE=1 SV=1	A0A0A6YVV2 (+2)	Gpx1	16 kDa		0.3	2.2	[]	unknown	3	0.5	3	0.5	0.5	0.5	0.5	0.5	2	0.5	1	0	1	0	0	0	0	0	1	0
389	TRUE	Empty	B-cell receptor-associated protein 31 OS=Mus musculus OX=10090 GN=Bcap31 PE=1 SV=4	Q61335	Bcap31	28 kDa		0.75	0.8	[]	unknown	2	0.5	0.5	0.5	0.5	0.5	0.5	3	0.5	0.5	1	0	0	0	0	0	0	1	0	0
382	TRUE	Empty	Isoform 3 of Plasminogen activator inhibitor 1 RNA-binding protein OS=Mus musculus OX=10090 GN=Serbp1	PAIRB_MOUSE		?		0.37	2	[]	unknown	0.5	0.5	2	5	0.5	0.5	0.5	0.5	0.5	0.5	0	0	1	1	0	0	0	0	0	0
392.1	TRUE	Empty	Isoform 2 of Rab GDP dissociation inhibitor beta OS=Mus musculus OX=10090 GN=Gdi2	GDIB_MOUSE		?	TRUE	0.37	4.7	[]	unknown	0.5	0.5	6	0.5	0.5	0.5	0.5	0.5	0.5	0.5	0	0	1	0	0	0	0	0	0	0
380.1	TRUE	Empty	GTP-binding protein SAR1a OS=Mus musculus OX=10090 GN=Sar1a PE=1 SV=1	Q99JZ4	Sar1a	22 kDa	TRUE	0.37	2.7	[]	unknown	0.5	0.5	3	0.5	0.5	0.5	0.5	0.5	0.5	0.5	0	0	1	0	0	0	0	0	0	0
384	TRUE	Empty	Pyruvate dehydrogenase E1 component subunit beta, mitochondrial OS=Mus musculus OX=10090 GN=Pdhb PE=1 SV=1	Q9D051	Pdhb	39 kDa		0.17	0.2	[]	unknown	0.5	0.5	0.5	0.5	0.5	0.5	0.5	0.5	3	6	0	0	0	0	0	0	0	0	1	1
383	TRUE	Empty	Chloride intracellular channel protein 1 OS=Mus musculus OX=10090 GN=Clic1 PE=1 SV=3	Q9Z1Q5	Clic1	27 kDa	TRUE	0.37	4.7	[]	unknown	0.5	0.5	6	0.5	0.5	0.5	0.5	0.5	0.5	0.5	0	0	1	0	0	0	0	0	0	0
381	TRUE	Empty	Spectrin alpha chain, non-erythrocytic 1 OS=Mus musculus OX=10090 GN=Sptan1 PE=1 SV=1	A3KGU7 (+2)	Sptan1	285 kDa		1	1	[]	unknown	0.5	0.5	0.5	0.5	0.5	0.5	10	0.5	0.5	0.5	0	0	0	0	0	0	1	0	0	0
321.2	TRUE	Empty	Copine-5 OS=Mus musculus OX=10090 GN=Cpne5 PE=1 SV=1	Q8JZW4	Cpne5	66 kDa	TRUE	1	1	[]	unknown	0.5	0.5	0.5	0.5	0.5	0.5	0.5	0.5	0.5	0.5	0	0	0	0	0	0	0	0	0	0
321.3	TRUE	Empty	Copine-7 OS=Mus musculus OX=10090 GN=Cpne7 PE=1 SV=1	Q0VE82	Cpne7	62 kDa	TRUE	1	1	[]	unknown	0.5	0.5	0.5	0.5	0.5	0.5	0.5	0.5	0.5	0.5	0	0	0	0	0	0	0	0	0	0
399	TRUE	Empty	Transitional endoplasmic reticulum ATPase OS=Mus musculus OX=10090 GN=Vcp PE=1 SV=4	Q01853	Vcp	89 kDa		0.12	3	[]	unknown	2	0.5	2	0.5	0.5	0.5	0.5	0.5	0.5	0.5	1	0	1	0	0	0	0	0	0	0
397	TRUE	Empty	Elongator complex protein 5 OS=Mus musculus OX=10090 GN=Elp5 PE=2 SV=1	Q99L85	Elp5	33 kDa		0.37	0.4	[]	unknown	0.5	0.5	0.5	2	0.5	0.5	0.5	3	0.5	0.5	0	0	0	1	0	0	0	1	0	0
398	TRUE	Empty	ATP synthase F(0) complex subunit B1, mitochondrial OS=Mus musculus OX=10090 GN=Atp5pb PE=1 SV=1	Q9CQQ7	Atp5pb	29 kDa		0.37	3.3	[]	unknown	0.5	0.5	4	0.5	0.5	0.5	0.5	0.5	0.5	0.5	0	0	1	0	0	0	0	0	0	0
401	TRUE	Empty	40S ribosomal protein S6 OS=Mus musculus OX=10090 GN=Rps6 PE=1 SV=1	P62754	Rps6	29 kDa		0.37	2	[]	unknown	2	0.5	0.5	0.5	0.5	0.5	0.5	0.5	0.5	0.5	1	0	0	0	0	0	0	0	0	0
393	TRUE	Empty	Protein S100-A11 OS=Mus musculus OX=10090 GN=S100a11 PE=1 SV=1	P50543	S100a11	11 kDa		0.37	0.3	[]	unknown	0.5	0.5	0.5	0.5	0.5	0.5	0.5	0.5	4	0.5	0	0	0	0	0	0	0	0	1	0
394	TRUE	Empty	Proteasome subunit beta type-6 OS=Mus musculus OX=10090 GN=Psmb6 PE=1 SV=3	Q60692	Psmb6	25 kDa		0.37	2.7	[]	unknown	0.5	0.5	3	0.5	0.5	0.5	3	0.5	0.5	0.5	0	0	1	0	0	0	1	0	0	0
396	TRUE	Empty	Midkine OS=Mus musculus OX=10090 GN=Mdk PE=1 SV=2	P12025	Mdk	15 kDa		0.12	3	[]	unknown	2	0.5	2	0.5	0.5	0.5	3	0.5	0.5	0.5	1	0	1	0	0	0	1	0	0	0
400	TRUE	Empty	Ras-related protein R-Ras2 OS=Mus musculus OX=10090 GN=Rras2 PE=1 SV=1	P62071	Rras2	23 kDa	TRUE	0.52	1.5	[]	unknown	2	2	0.5	0.5	0.5	0.5	0.5	2	0.5	0.5	1	1	0	0	0	0	0	1	0	0
395	TRUE	Empty	Rho GDP-dissociation inhibitor 1 OS=Mus musculus OX=10090 GN=Arhgdia PE=1 SV=3	Q99PT1	Arhgdia	23 kDa		0.37	4.7	[]	unknown	0.5	0.5	6	0.5	0.5	0.5	0.5	0.5	0.5	0.5	0	0	1	0	0	0	0	0	0	0
380.2	TRUE	Empty	GTP-binding protein SAR1b OS=Mus musculus OX=10090 GN=Sar1b PE=1 SV=1	Q9CQC9	Sar1b	22 kDa	TRUE	0.37	2	[]	unknown	0.5	0.5	2	0.5	0.5	0.5	0.5	0.5	0.5	0.5	0	0	0.75	0	0	0	0	0	0	0
403.1	TRUE	Empty	Tropomodulin-3 OS=Mus musculus OX=10090 GN=Tmod3 PE=1 SV=1	Q9JHJ0	Tmod3	40 kDa	TRUE	1	1	[]	unknown	0.5	0.5	0.5	0.5	0.5	0.5	8	0.5	0.5	0.5	0	0	0	0	0	0	1	0	0	0
178.3	TRUE	Empty	Aldehyde dehydrogenase X, mitochondrial OS=Mus musculus OX=10090 GN=Aldh1b1 PE=1 SV=1	Q9CZS1	Aldh1b1	58 kDa	TRUE	1	1	[]	unknown	0.5	0.5	0.5	0.5	0.5	0.5	0.5	0.5	0.5	0.5	0	0	0	0	0	0	0	0	0	0
413	TRUE	Empty	RNA-binding protein FUS (Fragment) OS=Mus musculus OX=10090 GN=Fus PE=1 SV=1	G3UXT7	Fus	14 kDa		0.37	2	[]	unknown	2	0.5	0.5	0.5	0.5	0.5	0.5	0.5	0.5	0.5	1	0	0	0	0	0	0	0	0	0
415	TRUE	Empty	Proteasome subunit beta type-1 OS=Mus musculus OX=10090 GN=Psmb1 PE=1 SV=1	O09061	Psmb1	26 kDa		0.37	2.7	[]	unknown	0.5	0.5	3	0.5	0.5	0.5	0.5	0.5	0.5	0.5	0	0	0.97	0	0	0	0	0	0	0
418.1	TRUE	Empty	Polyadenylate-binding protein 1 OS=Mus musculus OX=10090 GN=Pabpc1 PE=1 SV=2	P29341	Pabpc1	71 kDa	TRUE	1	1	[]	unknown	0.5	0.5	0.5	2	0.5	0.5	0.5	0.5	0.5	0.5	0	0	0	1	0	0	0	0	0	0
419.1	TRUE	Empty	Isoform 2 of Rap1 GTPase-activating protein 1 OS=Mus musculus OX=10090 GN=Rap1gap	RPGP1_MOUSE		?	TRUE	0.37	0.5	[]	unknown	0.5	0.5	0.5	0.5	0.5	3	0.5	0.5	2	0.5	0	0	0	0	0	1	0	0	1	0
407	TRUE	Empty	Elongation factor 1-gamma OS=Mus musculus OX=10090 GN=Eef1g PE=1 SV=3	Q9D8N0	Eef1g	50 kDa		0.37	3.3	[]	unknown	0.5	0.5	4	2	0.5	0.5	0.5	0.5	0.5	0.5	0	0	1	0.99	0	0	0	0	0	0
406	TRUE	Empty	Mitochondrial import inner membrane translocase subunit TIM16 OS=Mus musculus OX=10090 GN=Pam16 PE=1 SV=1	Q9CQV1	Pam16	14 kDa		0.37	0.5	[]	unknown	0.5	0.5	0.5	0.5	0.5	0.5	4	0.5	2	0.5	0	0	0	0	0	0	1	0	1	0
417	TRUE	Empty	Cytoplasmic dynein 1 heavy chain 1 OS=Mus musculus OX=10090 GN=Dync1h1 PE=1 SV=2	Q9JHU4	Dync1h1	532 kDa		0.37	0.5	[]	unknown	0.5	0.5	0.5	0.5	0.5	0.5	4	0.5	0.5	2	0	0	0	0	0	0	0.97	0	0	0.88
408	TRUE	Empty	Fibronectin OS=Mus musculus OX=10090 GN=Fn1 PE=1 SV=1	A0A087WR50 (+6)	Fn1	263 kDa		0.37	3.3	[]	unknown	0.5	0.5	4	0.5	0.5	0.5	0.5	0.5	0.5	0.5	0	0	1	0	0	0	0	0	0	0
219.2	TRUE	Empty	Isoform 2 of Filamin-C OS=Mus musculus OX=10090 GN=Flnc	FLNC_MOUSE		?	TRUE	0.12	3	[]	unknown	2	0.5	2	0.5	0.5	0.5	0.5	0.5	0.5	0.5	0.9	0	1	0	0	0	0	0	0	0
456	TRUE	Empty	AHNAK nucleoprotein (desmoyokin) OS=Mus musculus OX=10090 GN=Ahnak PE=1 SV=1	E9Q616	Ahnak	604 kDa		1	1	[]	unknown	0.5	0.5	0.5	0.5	0.5	0.5	2	0.5	0.5	0.5	0	0	0	0	0	0	1	0	0	0
412	TRUE	Empty	Pancreatic alpha-amylase OS=Mus musculus OX=10090 GN=Amy2 PE=1 SV=2	P00688	Amy2	57 kDa		0.37	2.7	[]	unknown	0.5	0.5	3	0.5	4	0.5	0.5	0.5	0.5	0.5	0	0	1	0	1	0	0	0	0	0
405	TRUE	Empty	Glutamate dehydrogenase 1, mitochondrial OS=Mus musculus OX=10090 GN=Glud1 PE=1 SV=1	P26443	Glud1	61 kDa		0.37	5.3	[]	unknown	0.5	0.5	7	0.5	0.5	0.5	0.5	0.5	0.5	0.5	0	0	1	0	0	0	0	0	0	0
410	TRUE	Empty	Cathepsin D OS=Mus musculus OX=10090 GN=Ctsd PE=1 SV=2	F8WIR1 (+1)	Ctsd	44 kDa		0.37	4.7	[]	unknown	0.5	0.5	6	0.5	0.5	0.5	0.5	0.5	0.5	0.5	0	0	1	0	0	0	0	0	0	0
416	TRUE	Empty	Chloride intracellular channel protein 5 OS=Mus musculus OX=10090 GN=Clic5 PE=1 SV=1	Q8BXK9	Clic5	28 kDa	TRUE	1	1	[]	unknown	0.5	0.5	0.5	0.5	0.5	0.5	3	0.5	0.5	0.5	0	0	0	0	0	0	0.98	0	0	0
411	TRUE	Empty	Carbonic anhydrase 2 OS=Mus musculus OX=10090 GN=Ca2 PE=1 SV=4	P00920	Ca2	29 kDa		0.37	5.3	[]	unknown	0.5	0.5	7	0.5	0.5	0.5	0.5	0.5	0.5	0.5	0	0	1	0	0	0	0	0	0	0
404	TRUE	Empty	Malate dehydrogenase, mitochondrial OS=Mus musculus OX=10090 GN=Mdh2 PE=1 SV=3	P08249	Mdh2	36 kDa		0.37	5.3	[]	unknown	0.5	0.5	7	0.5	0.5	0.5	0.5	0.5	0.5	0.5	0	0	1	0	0	0	0	0	0	0
409	TRUE	Empty	Isoform 2 of Unconventional myosin-Id OS=Mus musculus OX=10090 GN=Myo1d	MYO1D_MOUSE		?		1	1	[]	unknown	0.5	0.5	0.5	0.5	0.5	0.5	7	0.5	0.5	0.5	0	0	0	0	0	0	1	0	0	0
414	TRUE	Empty	Glutathione S-transferase A4 OS=Mus musculus OX=10090 GN=Gsta4 PE=1 SV=3	P24472	Gsta4	26 kDa	TRUE	0.37	4	[]	unknown	0.5	0.5	5	0.5	0.5	0.5	0.5	0.5	0.5	0.5	0	0	1	0	0	0	0	0	0	0
428	TRUE	Empty	Histidine triad nucleotide-binding protein 1 OS=Mus musculus OX=10090 GN=Hint1 PE=1 SV=3	P70349	Hint1	14 kDa		1	1	[]	unknown	0.5	0.5	0.5	0.5	0.5	0.5	3	0.5	0.5	0.5	0	0	0	0	0	0	1	0	0	0
429	TRUE	Empty	Alpha-crystallin B chain (Fragment) OS=Mus musculus OX=10090 GN=Cryab PE=1 SV=1	A0A1L1SRG5 (+1)	Cryab	15 kDa		1	1	[]	unknown	0.5	0.5	2	0.5	0.5	0.5	0.5	0.5	2	0.5	0	0	1	0	0	0	0	0	1	0
427	TRUE	Empty	Isoform 3 of Band 4.1-like protein 5 OS=Mus musculus OX=10090 GN=Epb41l5	E41L5_MOUSE		?		1	1	[]	unknown	0.5	0.5	0.5	0.5	3	0.5	0.5	0.5	0.5	0.5	0	0	0	0	1	0	0	0	0	0
425	TRUE	Empty	Poly(rC)-binding protein 1 OS=Mus musculus OX=10090 GN=Pcbp1 PE=1 SV=1	P60335	Pcbp1	37 kDa		0.75	1.3	[]	unknown	0.5	0.5	3	0.5	0.5	0.5	0.5	0.5	0.5	2	0	0	1	0	0	0	0	0	0	1
424	TRUE	Empty	Laminin subunit beta-3 OS=Mus musculus OX=10090 GN=Lamb3 PE=1 SV=2	Q61087	Lamb3	129 kDa		1	1	[]	unknown	0.5	0.5	0.5	3	0.5	2	0.5	0.5	0.5	0.5	0	0	0	1	0	1	0	0	0	0
430	TRUE	Empty	Complement C1s-A subcomponent OS=Mus musculus OX=10090 GN=C1sa PE=2 SV=2	Q8CG14 (+1)	C1sa	77 kDa		0.37	0.5	[]	unknown	0.5	0.5	0.5	0.5	0.5	0.5	0.5	0.5	2	0.5	0	0	0	0	0	0	0	0	1	0
426	TRUE	Empty	Nucleolin OS=Mus musculus OX=10090 GN=Ncl PE=1 SV=2	P09405	Ncl	77 kDa		1	1	[]	unknown	0.5	0.5	0.5	2	0.5	0.5	2	0.5	0.5	0.5	0	0	0	1	0	0	1	0	0	0
434.1	TRUE	Empty	Serine protease inhibitor A3K OS=Mus musculus OX=10090 GN=Serpina3k PE=1 SV=1	A0A0R4J0I1	Serpina3k	47 kDa	TRUE	0.18	4.3	[]	unknown	2	0.5	4	0.5	0.5	0.5	0.5	0.5	0.5	0.5	1	0	1	0	0	0	0	0	0	0
433	TRUE	Empty	Extracellular matrix protein FRAS1 OS=Mus musculus OX=10090 GN=Fras1 PE=1 SV=2	Q80T14	Fras1	442 kDa		0.37	2	[]	unknown	0.5	2	0.5	0.5	0.5	0.5	0.5	0.5	0.5	0.5	0	0.94	0	0	0	0	0	0	0	0
423	TRUE	Empty	Isoform 2 of Transmembrane emp24 domain-containing protein 10 OS=Mus musculus OX=10090 GN=Tmed10	TMEDA_MOUSE		?		0.37	3.3	[]	unknown	0.5	0.5	4	0.5	2	0.5	0.5	0.5	0.5	0.5	0	0	1	0	1	0	0	0	0	0
432	TRUE	Empty	Neutrophil gelatinase-associated lipocalin OS=Mus musculus OX=10090 GN=Lcn2 PE=1 SV=1	P11672	Lcn2	23 kDa		0.37	2	[]	unknown	0.5	0.5	2	0.5	0.5	0.5	0.5	0.5	0.5	0.5	0	0	0.95	0	0	0	0	0	0	0
431	TRUE	Empty	Mitochondrial dicarboxylate carrier OS=Mus musculus OX=10090 GN=Slc25a10 PE=1 SV=2	Q9QZD8	Slc25a10	32 kDa		0.37	2	[]	unknown	2	0.5	0.5	0.5	0.5	0.5	0.5	0.5	0.5	0.5	1	0	0	0	0	0	0	0	0	0
422	TRUE	Empty	Proteasome subunit alpha type-6 OS=Mus musculus OX=10090 GN=Psma6 PE=1 SV=1	Q9QUM9	Psma6	27 kDa		0.37	4	[]	unknown	0.5	0.5	5	0.5	0.5	0.5	0.5	0.5	0.5	0.5	0	0	1	0	0	0	0	0	0	0
402.1	TRUE	Empty	Serine/threonine-protein phosphatase OS=Mus musculus OX=10090 GN=Ppp3cb PE=1 SV=1	E9Q6P2	Ppp3cb	56 kDa	TRUE	0.37	2.7	[]	unknown	0.5	0.5	3	0.5	0.5	0.5	0.5	0.5	0.5	0.5	0	0	0.48	0	0	0	0	0	0	0
421	TRUE	Empty	Isoform 3 of Unconventional myosin-Ic OS=Mus musculus OX=10090 GN=Myo1c	MYO1C_MOUSE		?		1	1	[]	unknown	0.5	0.5	0.5	0.5	0.5	0.5	7	0.5	0.5	0.5	0	0	0	0	0	0	1	0	0	0
420	TRUE	Empty	Transmembrane and coiled-coil domains protein 2 OS=Mus musculus OX=10090 GN=Tmcc2 PE=1 SV=1	A0A5F8MQA9 (+1)	Tmcc2	57 kDa		1	1	[]	unknown	0.5	0.5	0.5	0.5	0.5	7	0.5	0.5	0.5	0.5	0	0	0	0	0	1	0	0	0	0
310.2	TRUE	Empty	Microtubule-associated protein 1A OS=Mus musculus OX=10090 GN=Map1a PE=1 SV=1	A2ARP8 (+1)	Map1a	326 kDa	TRUE	1	1	[]	unknown	0.5	0.5	0.5	0.5	0.5	0.5	0.5	0.5	0.5	0.5	0	0	0	0	0	0	0	0	0	0
236.2	TRUE	Empty	Transgelin-3 OS=Mus musculus OX=10090 GN=Tagln3 PE=1 SV=1	Q9R1Q8	Tagln3	22 kDa	TRUE	1	1	[]	unknown	0.5	0.5	0.5	0.5	0.5	0.5	0.5	0.5	0.5	0.5	0	0	0	0	0	0	0	0	0	0
442	TRUE	Empty	Receptor of activated protein C kinase 1 OS=Mus musculus OX=10090 GN=Rack1 PE=1 SV=3	P68040	Rack1	35 kDa		0.37	2	[]	unknown	2	0.5	0.5	0.5	0.5	0.5	0.5	0.5	0.5	0.5	1	0	0	0	0	0	0	0	0	0
448	TRUE	Empty	Guanine nucleotide-binding protein G(I)/G(S)/G(T) subunit beta-2 OS=Mus musculus OX=10090 GN=Gnb2 PE=1 SV=1	E9QKR0 (+1)	Gnb2	41 kDa		0.37	2	[]	unknown	2	0.5	0.5	0.5	0.5	0.5	0.5	0.5	0.5	0.5	1	0	0	0	0	0	0	0	0	0
449	TRUE	Empty	Transmembrane protein 109 OS=Mus musculus OX=10090 GN=Tmem109 PE=1 SV=1	D3YX08 (+3)	Tmem109	12 kDa		0.37	2	[]	unknown	0.5	2	0.5	0.5	0.5	0.5	0.5	0.5	0.5	0.5	0	1	0	0	0	0	0	0	0	0
441	TRUE	Empty	Immunoglobulin heavy variable 1-39 (Fragment) OS=Mus musculus OX=10090 GN=Ighv1-39 PE=4 SV=1	A0A075B5V5	Ighv1-39	13 kDa		0.37	0.5	[]	unknown	0.5	0.5	0.5	0.5	0.5	0.5	0.5	0.5	2	0.5	0	0	0	0	0	0	0	0	1	0
454	TRUE	Empty	ADP-ribosylation factor-like protein 1 OS=Mus musculus OX=10090 GN=Arl1 PE=1 SV=1	P61211	Arl1	20 kDa		0.37	2	[]	unknown	0.5	0.5	2	0.5	0.5	0.5	0.5	0.5	0.5	0.5	0	0	1	0	0	0	0	0	0	0
450	TRUE	Empty	Low affinity immunoglobulin gamma Fc region receptor IV OS=Mus musculus OX=10090 GN=Fcgr4 PE=1 SV=1	A0A0B4J1G0	Fcgr4	28 kDa		1	1	[]	unknown	0.5	0.5	2	0.5	0.5	0.5	0.5	0.5	0.5	2	0	0	1	0	0	0	0	0	0	1
443	TRUE	Empty	60S acidic ribosomal protein P2 OS=Mus musculus OX=10090 GN=Rplp2 PE=1 SV=3	P99027	Rplp2	12 kDa		0.37	0.4	[]	unknown	0.5	0.5	0.5	0.5	0.5	0.5	0.5	3	0.5	0.5	0	0	0	0	0	0	0	1	0	0
451	TRUE	Empty	V-type proton ATPase subunit B, brain isoform OS=Mus musculus OX=10090 GN=Atp6v1b2 PE=1 SV=1	P62814	Atp6v1b2	57 kDa		0.37	2	[]	unknown	0.5	0.5	2	0.5	0.5	0.5	2	0.5	0.5	0.5	0	0	1	0	0	0	1	0	0	0
444	TRUE	Empty	Heterogeneous nuclear ribonucleoprotein L OS=Mus musculus OX=10090 GN=Hnrnpl PE=1 SV=2	Q8R081	Hnrnpl	64 kDa		0.37	2	[]	unknown	0.5	0.5	2	0.5	0.5	0.5	0.5	0.5	0.5	0.5	0	0	1	0	0	0	0	0	0	0
439	TRUE	Empty	Heterogeneous nuclear ribonucleoprotein A1 OS=Mus musculus OX=10090 GN=Hnrnpa1 PE=1 SV=1	Q5EBP8 (+1)	Hnrnpa1	39 kDa		0.37	2.7	[]	unknown	3	0.5	0.5	0.5	0.5	0.5	0.5	0.5	0.5	0.5	1	0	0	0	0	0	0	0	0	0
445	TRUE	Empty	Vacuolar protein sorting-associated protein 35 OS=Mus musculus OX=10090 GN=Vps35 PE=1 SV=1	Q9EQH3	Vps35	92 kDa		0.37	2.7	[]	unknown	0.5	0.5	3	2	0.5	0.5	0.5	0.5	0.5	0.5	0	0	1	1	0	0	0	0	0	0
437	TRUE	Empty	Eukaryotic translation initiation factor 5A (Fragment) OS=Mus musculus OX=10090 GN=Eif5a PE=1 SV=1	A0A0A0MQM0 (+1)	Eif5a	16 kDa		0.37	3.3	[]	unknown	0.5	0.5	4	0.5	0.5	0.5	0.5	0.5	0.5	0.5	0	0	1	0	0	0	0	0	0	0
436	TRUE	Empty	SH3 domain-binding glutamic acid-rich-like protein OS=Mus musculus OX=10090 GN=Sh3bgrl PE=1 SV=1	Q9JJU8	Sh3bgrl	13 kDa		1	1	[]	unknown	0.5	0.5	0.5	0.5	0.5	0.5	4	0.5	0.5	0.5	0	0	0	0	0	0	1	0	0	0
455	TRUE	Empty	Clathrin light chain OS=Mus musculus OX=10090 GN=Clta PE=1 SV=1	B1AWD8 (+5)	Clta	26 kDa		0.37	0.4	[]	unknown	0.5	0.5	0.5	0.5	0.5	0.5	0.5	0.5	0.5	3	0	0	0	0	0	0	0	0	0	1
452	TRUE	Empty	Protein S100-A4 OS=Mus musculus OX=10090 GN=S100a4 PE=1 SV=1	P07091	S100a4	12 kDa		1	1	[]	unknown	0.5	0.5	0.5	0.5	0.5	0.5	3	0.5	0.5	0.5	0	0	0	0	0	0	1	0	0	0
446	TRUE	Empty	Purine nucleoside phosphorylase OS=Mus musculus OX=10090 GN=Pnp PE=1 SV=2	P23492	Pnp	32 kDa		0.37	3.3	[]	unknown	0.5	0.5	4	0.5	0.5	0.5	0.5	0.5	0.5	0.5	0	0	1	0	0	0	0	0	0	0
458	TRUE	Empty	Succinate dehydrogenase [ubiquinone] iron-sulfur subunit, mitochondrial OS=Mus musculus OX=10090 GN=Sdhb PE=1 SV=1	Q9CQA3	Sdhb	32 kDa		0.37	2.7	[]	unknown	0.5	0.5	3	0.5	0.5	0.5	0.5	0.5	0.5	0.5	0	0	0.99	0	0	0	0	0	0	0
447	TRUE	Empty	Proteasome subunit beta type-3 OS=Mus musculus OX=10090 GN=Psmb3 PE=1 SV=1	Q9R1P1	Psmb3	23 kDa		0.14	3.7	[]	unknown	2	0.5	3	0.5	0.5	0.5	0.5	0.5	0.5	0.5	0.99	0	1	0	0	0	0	0	0	0
438	TRUE	Empty	Syntaxin-8 OS=Mus musculus OX=10090 GN=Stx8 PE=1 SV=1	O88983	Stx8	27 kDa		1	1	[]	unknown	0.5	0.5	0.5	0.5	0.5	4	0.5	0.5	0.5	0.5	0	0	0	0	0	1	0	0	0	0
402.2	TRUE	Empty	Serine/threonine-protein phosphatase 2B catalytic subunit alpha isoform OS=Mus musculus OX=10090 GN=Ppp3ca PE=1 SV=1	PP2BA_MOUSE		?	TRUE	0.37	2.7	[]	unknown	0.5	0.5	3	0.5	0.5	0.5	0.5	0.5	0.5	0.5	0	0	0.92	0	0	0	0	0	0	0
440	TRUE	Empty	Isoform 2 of Poly(U)-binding-splicing factor PUF60 OS=Mus musculus OX=10090 GN=Puf60	PUF60_MOUSE		?		0.37	3.3	[]	unknown	4	0.5	0.5	0.5	0.5	2	0.5	0.5	0.5	0.5	1	0	0	0	0	1	0	0	0	0
453	TRUE	Empty	Coactosin-like protein OS=Mus musculus OX=10090 GN=Cotl1 PE=1 SV=3	Q9CQI6	Cotl1	16 kDa		0.37	4	[]	unknown	0.5	0.5	5	0.5	0.5	0.5	0.5	0.5	0.5	0.5	0	0	1	0	0	0	0	0	0	0
435	TRUE	Empty	MICOS complex subunit Mic19 OS=Mus musculus OX=10090 GN=Chchd3 PE=1 SV=1	Q9CRB9	Chchd3	26 kDa		1	1	[]	unknown	0.5	0.5	0.5	0.5	0.5	0.5	5	0.5	0.5	0.5	0	0	0	0	0	0	1	0	0	0
457	TRUE	Empty	Serine/threonine-protein kinase Nek1 OS=Mus musculus OX=10090 GN=Nek1 PE=1 SV=2	P51954	Nek1	137 kDa		1	1	[]	unknown	0.5	0.5	0.5	0.5	5	0.5	0.5	0.5	0.5	0.5	0	0	0	0	1	0	0	0	0	0
273.2	TRUE	Empty	L-lactate dehydrogenase B chain OS=Mus musculus OX=10090 GN=Ldhb PE=1 SV=2	P16125	Ldhb	37 kDa	TRUE	1	1	[]	unknown	0.5	0.5	0.5	0.5	0.5	0.5	0.5	0.5	0.5	0.5	0	0	0	0	0	0	0	0	0	0
298.3	TRUE	Empty	EH domain-containing protein 3 OS=Mus musculus OX=10090 GN=Ehd3 PE=1 SV=2	Q9QXY6	Ehd3	61 kDa	TRUE	1	1	[]	unknown	0.5	0.5	0.5	0.5	0.5	0.5	0.5	0.5	0.5	0.5	0	0	0	0	0	0	0	0	0	0
471	TRUE	Empty	60S ribosomal protein L6 OS=Mus musculus OX=10090 GN=Rpl6 PE=1 SV=3	P47911	Rpl6	34 kDa		0.37	2	[]	unknown	0.5	2	0.5	0.5	0.5	0.5	0.5	0.5	0.5	0.5	0	1	0	0	0	0	0	0	0	0
477	TRUE	Empty	Probable ATP-dependent RNA helicase DDX5 OS=Mus musculus OX=10090 GN=Ddx5 PE=1 SV=2	Q61656 (+1)	Ddx5	69 kDa		0.37	2	[]	unknown	0.5	0.5	2	0.5	0.5	0.5	0.5	0.5	0.5	0.5	0	0	1	0	0	0	0	0	0	0
479	TRUE	Empty	GTPase KRas OS=Mus musculus OX=10090 GN=Kras PE=1 SV=1	RASK_MOUSE		?		0.37	0.5	[]	unknown	0.5	0.5	0.5	0.5	0.5	0.5	0.5	0.5	2	0.5	0	0	0	0	0	0	0	0	1	0
475	TRUE	Empty	Pyruvate dehydrogenase E1 component subunit alpha, somatic form, mitochondrial OS=Mus musculus OX=10090 GN=Pdha1 PE=1 SV=1	P35486	Pdha1	43 kDa		0.37	0.4	[]	unknown	0.5	0.5	0.5	0.5	0.5	0.5	0.5	0.5	0.5	3	0	0	0	0	0	0	0	0	0	1
474	TRUE	Empty	Flavin reductase (NADPH) OS=Mus musculus OX=10090 GN=Blvrb PE=1 SV=1	E9PZC3 (+1)	Blvrb	27 kDa		0.37	0.4	[]	unknown	0.5	0.5	0.5	0.5	0.5	0.5	0.5	3	0.5	0.5	0	0	0	0	0	0	0	1	0	0
468	TRUE	Empty	Isoform 2 of Ras-related protein Rab-6A OS=Mus musculus OX=10090 GN=Rab6a	RAB6A_MOUSE		?		1	1	[]	unknown	0.5	0.5	2	0.5	0.5	0.5	0.5	2	0.5	0.5	0	0	1	0	0	0	0	1	0	0
481	TRUE	Empty	60S ribosomal protein L36 OS=Mus musculus OX=10090 GN=Rpl36 PE=1 SV=2	P47964	Rpl36	12 kDa		1	1	[]	unknown	0.5	0.5	0.5	0.5	0.5	0.5	3	0.5	0.5	0.5	0	0	0	0	0	0	1	0	0	0
465	TRUE	Empty	Actin-related protein 3 OS=Mus musculus OX=10090 GN=Actr3 PE=1 SV=3	Q99JY9	Actr3	47 kDa		1	1	[]	unknown	0.5	0.5	0.5	0.5	0.5	0.5	3	0.5	0.5	0.5	0	0	0	0	0	0	1	0	0	0
469	TRUE	Empty	Proteasome endopeptidase complex OS=Mus musculus OX=10090 GN=Psma1 PE=1 SV=1	A0A1B0GS70 (+1)	Psma1	26 kDa		0.37	2.7	[]	unknown	0.5	0.5	3	0.5	0.5	0.5	0.5	0.5	0.5	0.5	0	0	1	0	0	0	0	0	0	0
482	TRUE	Empty	Gasdermin-A2 OS=Mus musculus OX=10090 GN=Gsdma2 PE=2 SV=1	GSDA2_MOUSE		?		1	1	[]	unknown	0.5	0.5	0.5	2	0.5	0.5	0.5	0.5	0.5	0.5	0	0	0	0.96	0	0	0	0	0	0
483.1	TRUE	Empty	Spectrin beta chain, non-erythrocytic 1 OS=Mus musculus OX=10090 GN=Sptbn1 PE=1 SV=2	SPTB2_MOUSE		?	TRUE	1	1	[]	unknown	0.5	0.5	0.5	0.5	0.5	0.5	4	0.5	0.5	0.5	0	0	0	0	0	0	1	0	0	0
462	TRUE	Empty	Isoform PLEC-1B of Plectin OS=Mus musculus OX=10090 GN=Plec	PLEC_MOUSE		?	TRUE	1	1	[]	unknown	0.5	0.5	0.5	0.5	0.5	0.5	4	0.5	0.5	0.5	0	0	0	0	0	0	1	0	0	0
464	TRUE	Empty	60S ribosomal protein L4 OS=Mus musculus OX=10090 GN=Rpl4 PE=1 SV=3	Q9D8E6	Rpl4	47 kDa		0.37	2	[]	unknown	0.5	2	0.5	3	0.5	0.5	0.5	0.5	0.5	0.5	0	1	0	1	0	0	0	0	0	0
467	TRUE	Empty	Immunoglobulin kappa chain variable 12-38 OS=Mus musculus OX=10090 GN=Igkv12-38 PE=4 SV=7	A0A075B5M8 (+1)	Igkv12-38	12 kDa		0.14	0.3	[]	unknown	0.5	0.5	0.5	0.5	0.5	0.5	0.5	3	2	0.5	0	0	0	0	0	0	0	1	1	0
466	TRUE	Empty	Calmodulin-1 OS=Mus musculus OX=10090 GN=Calm1 PE=1 SV=1	Q3UKW2	Calm1	22 kDa		1	1	[]	unknown	0.5	0.5	0.5	0.5	0.5	0.5	4	0.5	0.5	0.5	0	0	0	0	0	0	1	0	0	0
472	TRUE	Empty	Vitamin D-binding protein OS=Mus musculus OX=10090 GN=Gc PE=1 SV=2	P21614	Gc	54 kDa		0.37	4	[]	unknown	0.5	0.5	5	0.5	0.5	0.5	0.5	0.5	0.5	0.5	0	0	1	0	0	0	0	0	0	0
478	TRUE	Empty	Proteasome subunit alpha type-2 OS=Mus musculus OX=10090 GN=Psma2 PE=1 SV=3	P49722 (+1)	Psma2	26 kDa		0.37	2.7	[]	unknown	0.5	0.5	3	0.5	0.5	0.5	0.5	0.5	0.5	0.5	0	0	1	0	0	0	0	0	0	0
484.1	TRUE	Empty	Alpha-actinin-4 OS=Mus musculus OX=10090 GN=Actn4 PE=1 SV=1	P57780	Actn4	105 kDa	TRUE	1	1	[]	unknown	0.5	0.5	0.5	0.5	0.5	0.5	4	0.5	0.5	0.5	0	0	0	0	0	0	1	0	0	0
476	TRUE	Empty	Proteasome subunit alpha type-7 OS=Mus musculus OX=10090 GN=Psma7 PE=1 SV=1	Q9Z2U0	Psma7	28 kDa		0.37	2.7	[]	unknown	0.5	0.5	3	0.5	0.5	0.5	0.5	0.5	0.5	0.5	0	0	1	0	0	0	0	0	0	0
470	TRUE	Empty	Tropomodulin-1 OS=Mus musculus OX=10090 GN=Tmod1 PE=1 SV=2	P49813	Tmod1	40 kDa	TRUE	1	1	[]	unknown	0.5	0.5	0.5	0.5	0.5	0.5	4	0.5	0.5	0.5	0	0	0	0	0	0	1	0	0	0
460	TRUE	Empty	Glutathione S-transferase omega-1 OS=Mus musculus OX=10090 GN=Gsto1 PE=1 SV=2	O09131	Gsto1	27 kDa		0.37	4	[]	unknown	0.5	0.5	5	0.5	0.5	0.5	0.5	0.5	0.5	0.5	0	0	1	0	0	0	0	0	0	0
461	TRUE	Empty	High affinity immunoglobulin epsilon receptor subunit gamma OS=Mus musculus OX=10090 GN=Fcer1g PE=1 SV=1	P20491	Fcer1g	10 kDa		0.37	4	[]	unknown	5	0.5	0.5	0.5	0.5	0.5	0.5	0.5	0.5	0.5	1	0	0	0	0	0	0	0	0	0
463	TRUE	Empty	Receptor expression-enhancing protein 5 (Fragment) OS=Mus musculus OX=10090 GN=Reep5 PE=1 SV=1	A0A494BBE3	Reep5	12 kDa		0.37	4	[]	unknown	0.5	0.5	5	0.5	0.5	0.5	0.5	0.5	0.5	0.5	0	0	1	0	0	0	0	0	0	0
473	TRUE	Empty	RIKEN cDNA 2310050C09 gene OS=Mus musculus OX=10090 GN=2310050C09Rik PE=4 SV=1	G5E8Z3	2310050C09Rik	29 kDa		1	1	[]	unknown	0.5	0.5	0.5	5	0.5	0.5	0.5	0.5	0.5	0.5	0	0	0	1	0	0	0	0	0	0
459.1	TRUE	Empty	Glycogen phosphorylase, brain form OS=Mus musculus OX=10090 GN=Pygb PE=1 SV=3	Q8CI94	Pygb	97 kDa	TRUE	0.37	0.2	[]	unknown	0.5	0.5	0.5	0.5	0.5	0.5	0.5	0.5	0.5	5	0	0	0	0	0	0	0	0	0	1
480	TRUE	Empty	Pro-cathepsin H OS=Mus musculus OX=10090 GN=Ctsh PE=1 SV=2	P49935	Ctsh	37 kDa		0.37	4	[]	unknown	0.5	0.5	5	0.5	0.5	0.5	0.5	0.5	0.5	0.5	0	0	1	0	0	0	0	0	0	0
70.6	TRUE	Empty	Myosin-7B OS=Mus musculus OX=10090 GN=Myh7b PE=3 SV=1	A2AQP0	Myh7b	222 kDa	TRUE	1	1	[]	unknown	0.5	0.5	0.5	0.5	0.5	0.5	0.5	0.5	0.5	0.5	0	0	0	0	0	0	0	0	0	0
418.2	TRUE	Empty	Polyadenylate-binding protein OS=Mus musculus OX=10090 GN=Pabpc2 PE=1 SV=1	Q62029	Pabpc2	69 kDa	TRUE	1	1	[]	unknown	0.5	0.5	0.5	0.5	0.5	0.5	0.5	0.5	0.5	0.5	0	0	0	0	0	0	0	0	0	0
219.3	TRUE	Empty	Filamin-B OS=Mus musculus OX=10090 GN=Flnb PE=1 SV=3	Q80X90	Flnb	278 kDa	TRUE	1	1	[]	unknown	0.5	0.5	0.5	0.5	0.5	0.5	0.5	0.5	0.5	0.5	0	0	0	0	0	0	0	0	0	0
494	TRUE	Empty	F-box only protein 50 OS=Mus musculus OX=10090 GN=Nccrp1 PE=1 SV=1	A0A0A0MQ97 (+1)	Nccrp1	33 kDa		1	1	[]	unknown	0.5	0.5	0.5	0.5	0.5	0.5	2	0.5	0.5	0.5	0	0	0	0	0	0	1	0	0	0
502	TRUE	Empty	Vesicle-associated membrane protein, associated protein B and C OS=Mus musculus OX=10090 GN=Vapb PE=1 SV=1	Q8BH80 (+1)	Vapb	27 kDa		0.37	2	[]	unknown	0.5	2	0.5	0.5	0.5	0.5	0.5	0.5	0.5	0.5	0	1	0	0	0	0	0	0	0	0
496	TRUE	Empty	Isoform 2 of Cellular nucleic acid-binding protein OS=Mus musculus OX=10090 GN=Cnbp	CNBP_MOUSE		?		0.37	2	[]	unknown	2	0.5	0.5	0.5	0.5	0.5	0.5	0.5	0.5	0.5	1	0	0	0	0	0	0	0	0	0
505	TRUE	Empty	Glutathione S-transferase LANCL1 OS=Mus musculus OX=10090 GN=Lancl1 PE=1 SV=1	O89112	Lancl1	45 kDa		1	1	[]	unknown	0.5	0.5	0.5	2	0.5	0.5	0.5	0.5	0.5	0.5	0	0	0	1	0	0	0	0	0	0
499	TRUE	Empty	Arginase-1 OS=Mus musculus OX=10090 GN=Arg1 PE=1 SV=1	Q61176	Arg1	35 kDa		1	1	[]	unknown	0.5	0.5	0.5	0.5	0.5	0.5	2	0.5	0.5	0.5	0	0	0	0	0	0	1	0	0	0
503	TRUE	Empty	SUMO-conjugating enzyme UBC9 OS=Mus musculus OX=10090 GN=Ube2i PE=1 SV=1	P63280 (+2)	Ube2i	18 kDa		0.37	2	[]	unknown	2	0.5	0.5	0.5	0.5	0.5	0.5	0.5	0.5	0.5	1	0	0	0	0	0	0	0	0	0
509	TRUE	Empty	Dimethylaniline monooxygenase [N-oxide-forming] 2 OS=Mus musculus OX=10090 GN=Fmo2 PE=1 SV=3	Q8K2I3	Fmo2	61 kDa		0.37	0.5	[]	unknown	0.5	0.5	0.5	0.5	0.5	0.5	0.5	0.5	2	0.5	0	0	0	0	0	0	0	0	0.94	0
492	TRUE	Empty	Pulmonary surfactant-associated protein A OS=Mus musculus OX=10090 GN=Sftpa1 PE=1 SV=1	P35242 (+1)	Sftpa1	26 kDa		1	1	[]	unknown	0.5	0.5	0.5	0.5	0.5	0.5	3	0.5	0.5	0.5	0	0	0	0	0	0	1	0	0	0
491	TRUE	Empty	Enoyl-CoA delta isomerase 1, mitochondrial OS=Mus musculus OX=10090 GN=Eci1 PE=1 SV=1	A0A3Q4EC00	Eci1	28 kDa		0.37	2.7	[]	unknown	0.5	0.5	3	0.5	0.5	0.5	0.5	0.5	0.5	0.5	0	0	1	0	0	0	0	0	0	0
486	TRUE	Empty	Ras GTPase-activating-like protein IQGAP1 OS=Mus musculus OX=10090 GN=Iqgap1 PE=1 SV=2	Q9JKF1	Iqgap1	189 kDa		1	1	[]	unknown	0.5	0.5	0.5	0.5	0.5	0.5	3	0.5	0.5	0.5	0	0	0	0	0	0	1	0	0	0
497	TRUE	Empty	60S ribosomal protein L3 OS=Mus musculus OX=10090 GN=Rpl3 PE=1 SV=3	P27659	Rpl3	46 kDa	TRUE	1	1	[]	unknown	0.5	0.5	0.5	3	0.5	0.5	0.5	0.5	0.5	0.5	0	0	0	1	0	0	0	0	0	0
500	TRUE	Empty	Eukaryotic translation initiation factor 3 subunit L OS=Mus musculus OX=10090 GN=Eif3l PE=1 SV=1	Q8QZY1	Eif3l	67 kDa		0.37	2	[]	unknown	0.5	0.5	2	0.5	0.5	0.5	0.5	0.5	0.5	0.5	0	0	1	0	0	0	0	0	0	0
504	TRUE	Empty	Vesicle transport through interaction with t-SNAREs 1B homolog OS=Mus musculus OX=10090 GN=Vti1b PE=1 SV=1	Q91XH6	Vti1b	27 kDa		1	1	[]	unknown	0.5	0.5	0.5	0.5	0.5	0.5	2	0.5	0.5	0.5	0	0	0	0	0	0	1	0	0	0
495	TRUE	Empty	Proteasome subunit beta type-8 (Fragment) OS=Mus musculus OX=10090 GN=Psmb8 PE=1 SV=1	A0A494BAB6	Psmb8	10 kDa		0.37	2.7	[]	unknown	0.5	0.5	3	0.5	0.5	0.5	0.5	0.5	0.5	0.5	0	0	1	0	0	0	0	0	0	0
508	TRUE	Empty	Thioredoxin-dependent peroxide reductase, mitochondrial OS=Mus musculus OX=10090 GN=Prdx3 PE=1 SV=1	P20108	Prdx3	28 kDa		0.37	0.5	[]	unknown	0.5	0.5	0.5	0.5	0.5	0.5	0.5	0.5	2	0.5	0	0	0	0	0	0	0	0	0.97	0
512.1	TRUE	Empty	FRY-like transcription coactivator OS=Mus musculus OX=10090 GN=Fryl PE=1 SV=1	F8VQ05	Fryl	338 kDa	TRUE	0.37	0.5	[]	unknown	0.5	0.5	0.5	0.5	0.5	0.5	0.5	2	0.5	0.5	0	0	0	0	0	0	0	0.97	0	0
498	TRUE	Empty	Keratin, type II cytoskeletal 80 OS=Mus musculus OX=10090 GN=Krt80 PE=1 SV=1	Q0VBK2	Krt80	51 kDa	TRUE	1	1	[]	unknown	0.5	0.5	0.5	4	0.5	0.5	0.5	0.5	0.5	0.5	0	0	0	1	0	0	0	0	0	0
487	TRUE	Empty	Calcium-activated chloride channel regulator 1 OS=Mus musculus OX=10090 GN=Clca1 PE=1 SV=2	Q9D7Z6	Clca1	100 kDa		1	1	[]	unknown	0.5	0.5	0.5	0.5	0.5	4	0.5	0.5	0.5	0.5	0	0	0	0	0	1	0	0	0	0
507	TRUE	Empty	Proteasome subunit alpha type-3 OS=Mus musculus OX=10090 GN=Psma3 PE=1 SV=3	O70435	Psma3	28 kDa		0.37	2.7	[]	unknown	0.5	0.5	3	0.5	0.5	0.5	0.5	0.5	0.5	0.5	0	0	0.98	0	0	0	0	0	0	0
485	TRUE	Empty	Transketolase OS=Mus musculus OX=10090 GN=Tkt PE=1 SV=1	P40142	Tkt	68 kDa		0.37	3.3	[]	unknown	0.5	0.5	4	0.5	0.5	0.5	0.5	0.5	0.5	0.5	0	0	1	0	0	0	0	0	0	0
488	TRUE	Empty	cAMP-dependent protein kinase type II-alpha regulatory subunit OS=Mus musculus OX=10090 GN=Prkar2a PE=1 SV=1	A0A0A6YX73 (+1)	Prkar2a	43 kDa		1	1	[]	unknown	0.5	0.5	0.5	0.5	4	0.5	0.5	0.5	0.5	0.5	0	0	0	0	1	0	0	0	0	0
489	TRUE	Empty	Profilin-1 OS=Mus musculus OX=10090 GN=Pfn1 PE=1 SV=2	P62962	Pfn1	15 kDa		0.37	3.3	[]	unknown	0.5	0.5	4	0.5	0.5	0.5	0.5	0.5	0.5	0.5	0	0	1	0	0	0	0	0	0	0
490	TRUE	Empty	Electron transfer flavoprotein subunit beta (Fragment) OS=Mus musculus OX=10090 GN=Etfb PE=4 SV=2	A0A0U1RNR3	Etfb	19 kDa		0.37	3.3	[]	unknown	0.5	0.5	4	0.5	0.5	0.5	0.5	0.5	0.5	0.5	0	0	1	0	0	0	0	0	0	0
493	TRUE	Empty	Proteasome subunit alpha type-5 OS=Mus musculus OX=10090 GN=Psma5 PE=1 SV=1	Q9Z2U1	Psma5	26 kDa		0.37	3.3	[]	unknown	0.5	0.5	4	0.5	0.5	0.5	0.5	0.5	0.5	0.5	0	0	1	0	0	0	0	0	0	0
501	TRUE	Empty	Ras-interacting protein 1 OS=Mus musculus OX=10090 GN=Rasip1 PE=1 SV=3	Q3U0S6	Rasip1	104 kDa		1	1	[]	unknown	0.5	0.5	0.5	0.5	3	0.5	0.5	0.5	0.5	0.5	0	0	0	0	1	0	0	0	0	0
506	TRUE	Empty	Myosin light chain 3 OS=Mus musculus OX=10090 GN=Myl3 PE=1 SV=1	A0A0G2JDM3 (+2)	Myl3	14 kDa	TRUE	1	1	[]	unknown	0.5	0.5	0.5	0.5	0.5	0.5	4	0.5	0.5	0.5	0	0	0	0	0	0	1	0	0	0
510	TRUE	Empty	Immunoglobulin heavy variable V3-8 (Fragment) OS=Mus musculus OX=10090 GN=Ighv3-8 PE=4 SV=2	A0A075B5T0 (+1)	Ighv3-8	15 kDa	TRUE	0.37	2	[]	unknown	0.5	2	0.5	0.5	0.5	0.5	0.5	0.5	0.5	0.5	0	0.81	0	0	0	0	0	0	0	0
403.2	TRUE	Empty	Isoform 2 of Tropomodulin-2 OS=Mus musculus OX=10090 GN=Tmod2	TMOD2_MOUSE		?	TRUE	1	1	[]	unknown	0.5	0.5	0.5	0.5	0.5	0.5	3	0.5	0.5	0.5	0	0	0	0	0	0	0.45	0	0	0
484.2	TRUE	Empty	Alpha-actinin-1 OS=Mus musculus OX=10090 GN=Actn1 PE=1 SV=1	Q7TPR4	Actn1	103 kDa	TRUE	1	1	[]	unknown	0.5	0.5	0.5	0.5	0.5	0.5	3	0.5	0.5	0.5	0	0	0	0	0	0	0.08	0	0	0
484.3	TRUE	Empty	Alpha-actinin-3 OS=Mus musculus OX=10090 GN=Actn3 PE=2 SV=1	O88990	Actn3	103 kDa	TRUE	1	1	[]	unknown	0.5	0.5	0.5	0.5	0.5	0.5	0.5	0.5	0.5	0.5	0	0	0	0	0	0	0	0	0	0
526	TRUE	Empty	Isoform 5 of Myelin basic protein OS=Mus musculus OX=10090 GN=Mbp	MBP_MOUSE		?		0.37	0.5	[]	unknown	0.5	0.5	0.5	0.5	0.5	0.5	0.5	0.5	0.5	2	0	0	0	0	0	0	0	0	0	1
522	TRUE	Empty	T-complex protein 1 subunit theta OS=Mus musculus OX=10090 GN=Cct8 PE=1 SV=3	P42932 (+1)	Cct8	60 kDa		0.37	2	[]	unknown	0.5	0.5	2	0.5	0.5	0.5	0.5	0.5	0.5	0.5	0	0	1	0	0	0	0	0	0	0
516	TRUE	Empty	Collagen alpha-1(IV) chain OS=Mus musculus OX=10090 GN=Col4a1 PE=1 SV=4	P02463	Col4a1	161 kDa		0.37	2	[]	unknown	0.5	0.5	2	0.5	0.5	0.5	0.5	0.5	0.5	0.5	0	0	1	0	0	0	0	0	0	0
532.1	TRUE	Empty	Heterogeneous nuclear ribonucleoprotein D0 (Fragment) OS=Mus musculus OX=10090 GN=Hnrnpd PE=1 SV=1	F6ZV59 (+2)	Hnrnpd	25 kDa	TRUE	0.37	2	[]	unknown	0.5	0.5	2	0.5	0.5	0.5	0.5	0.5	0.5	0.5	0	0	1	0	0	0	0	0	0	0
530	TRUE	Empty	Proteasome subunit beta type-2 OS=Mus musculus OX=10090 GN=Psmb2 PE=1 SV=1	Q9R1P3	Psmb2	23 kDa		0.37	2	[]	unknown	0.5	0.5	2	0.5	0.5	0.5	0.5	0.5	0.5	0.5	0	0	1	0	0	0	0	0	0	0
531	TRUE	Empty	T-complex protein 1 subunit eta OS=Mus musculus OX=10090 GN=Cct7 PE=1 SV=1	P80313	Cct7	60 kDa		0.37	2	[]	unknown	2	0.5	0.5	0.5	0.5	0.5	0.5	0.5	0.5	0.5	1	0	0	0	0	0	0	0	0	0
520	TRUE	Empty	Eosinophil cationic protein 2 OS=Mus musculus OX=10090 GN=Ear2 PE=2 SV=1	P97425	Ear2	18 kDa	TRUE	0.37	0.5	[]	unknown	0.5	0.5	0.5	0.5	0.5	0.5	0.5	2	0.5	0.5	0	0	0	0	0	0	0	1	0	0
511.1	TRUE	Empty	Tensin 1 (Fragment) OS=Mus musculus OX=10090 GN=Tns1 PE=1 SV=1	A0A087WRU0	Tns1	182 kDa	TRUE	0.37	2	[]	unknown	0.5	0.5	2	0.5	0.5	0.5	0.5	0.5	0.5	0.5	0	0	0.79	0	0	0	0	0	0	0
523	TRUE	Empty	Citrate synthase, mitochondrial OS=Mus musculus OX=10090 GN=Cs PE=1 SV=1	Q9CZU6	Cs	52 kDa		0.37	2.7	[]	unknown	0.5	0.5	3	0.5	0.5	0.5	0.5	0.5	0.5	0.5	0	0	1	0	0	0	0	0	0	0
459.2	TRUE	Empty	Glycogen phosphorylase, muscle form OS=Mus musculus OX=10090 GN=Pygm PE=1 SV=3	Q9WUB3	Pygm	97 kDa	TRUE	0.37	0.4	[]	unknown	0.5	0.5	0.5	0.5	0.5	0.5	0.5	0.5	0.5	3	0	0	0	0	0	0	0	0	0	1
513	TRUE	Empty	Isoform Alpha of LIM domain and actin-binding protein 1 OS=Mus musculus OX=10090 GN=Lima1	LIMA1_MOUSE		?		1	1	[]	unknown	0.5	0.5	0.5	0.5	0.5	0.5	3	0.5	0.5	0.5	0	0	0	0	0	0	1	0	0	0
514	TRUE	Empty	Malate dehydrogenase OS=Mus musculus OX=10090 GN=Mdh1 PE=1 SV=1	A0A5F8MPN8 (+1)	Mdh1	39 kDa		0.37	2.7	[]	unknown	0.5	0.5	3	0.5	0.5	0.5	0.5	0.5	0.5	0.5	0	0	1	0	0	0	0	0	0	0
515	TRUE	Empty	Ubiquitin-conjugating enzyme E2 N OS=Mus musculus OX=10090 GN=Ube2n PE=1 SV=1	P61089	Ube2n	17 kDa		0.37	2.7	[]	unknown	0.5	0.5	3	0.5	0.5	0.5	0.5	0.5	0.5	0.5	0	0	1	0	0	0	0	0	0	0
517	TRUE	Empty	Carboxypeptidase OS=Mus musculus OX=10090 GN=Ctsa PE=1 SV=1	G3X8T3 (+1)	Ctsa	56 kDa		0.37	2.7	[]	unknown	0.5	0.5	3	0.5	0.5	0.5	0.5	0.5	0.5	0.5	0	0	1	0	0	0	0	0	0	0
518	TRUE	Empty	T-complex protein 1 subunit delta OS=Mus musculus OX=10090 GN=Cct4 PE=1 SV=3	P80315	Cct4	58 kDa		0.37	2.7	[]	unknown	0.5	0.5	3	0.5	0.5	0.5	0.5	0.5	0.5	0.5	0	0	1	0	0	0	0	0	0	0
519	TRUE	Empty	Matrix Gla protein OS=Mus musculus OX=10090 GN=Mgp PE=3 SV=1	P19788	Mgp	12 kDa		1	1	[]	unknown	0.5	0.5	0.5	0.5	0.5	0.5	3	0.5	0.5	0.5	0	0	0	0	0	0	1	0	0	0
521	TRUE	Empty	SH3 domain-binding glutamic acid-rich-like protein 3 OS=Mus musculus OX=10090 GN=Sh3bgrl3 PE=1 SV=1	Q91VW3	Sh3bgrl3	10 kDa		1	1	[]	unknown	0.5	0.5	0.5	0.5	0.5	0.5	3	0.5	0.5	0.5	0	0	0	0	0	0	1	0	0	0
524	TRUE	Empty	Protein 4.1 OS=Mus musculus OX=10090 GN=Epb41 PE=1 SV=1	A2A839 (+1)	Epb41	72 kDa		0.37	2.7	[]	unknown	0.5	3	0.5	0.5	0.5	0.5	0.5	0.5	0.5	0.5	0	1	0	0	0	0	0	0	0	0
525	TRUE	Empty	SEC14-like 3 (S. cerevisiae) OS=Mus musculus OX=10090 GN=Sec14l3 PE=1 SV=1	Q5SQ27	Sec14l3	46 kDa		0.37	2	[]	unknown	0.5	0.5	2	0.5	0.5	0.5	0.5	0.5	0.5	0.5	0	0	1	0	0	0	0	0	0	0
527	TRUE	Empty	Serine protease inhibitor A3N OS=Mus musculus OX=10090 GN=Serpina3n PE=1 SV=1	Q91WP6	Serpina3n	47 kDa		0.37	2.7	[]	unknown	0.5	0.5	3	0.5	0.5	0.5	0.5	0.5	0.5	0.5	0	0	1	0	0	0	0	0	0	0
528	TRUE	Empty	Actin-related protein 2/3 complex subunit 5-like protein OS=Mus musculus OX=10090 GN=Arpc5l PE=1 SV=1	Q9D898	Arpc5l	17 kDa		1	1	[]	unknown	0.5	0.5	0.5	0.5	0.5	0.5	3	0.5	0.5	0.5	0	0	0	0	0	0	1	0	0	0
529	TRUE	Empty	Dipeptidase 1 OS=Mus musculus OX=10090 GN=Dpep1 PE=1 SV=2	P31428	Dpep1	46 kDa		1	1	[]	unknown	0.5	0.5	0.5	0.5	0.5	0.5	3	0.5	0.5	0.5	0	0	0	0	0	0	1	0	0	0
533.1	TRUE	Empty	Carbonic anhydrase 1 OS=Mus musculus OX=10090 GN=Ca1 PE=1 SV=4	P13634	Ca1	28 kDa	TRUE	0.37	2.7	[]	unknown	0.5	0.5	3	0.5	0.5	0.5	0.5	0.5	0.5	0.5	0	0	1	0	0	0	0	0	0	0
511.2	TRUE	Empty	Isoform 3 of Tensin-2 OS=Mus musculus OX=10090 GN=Tns2	TNS2_MOUSE		?	TRUE	0.37	2	[]	unknown	0.5	0.5	2	0.5	0.5	0.5	0.5	0.5	0.5	0.5	0	0	0.66	0	0	0	0	0	0	0
345.2	TRUE	Empty	Isoform 2 of Myotubularin-related protein 4 OS=Mus musculus OX=10090 GN=Mtmr4	MTMR4_MOUSE		?	TRUE	1	1	[]	unknown	0.5	0.5	0.5	0.5	0.5	0.5	0.5	0.5	0.5	0.5	0	0	0	0	0	0	0	0	0	0
70.7	TRUE	Empty	Myosin-4 OS=Mus musculus OX=10090 GN=Myh4 PE=2 SV=1	Q5SX39	Myh4	223 kDa	TRUE	1	1	[]	unknown	0.5	0.5	0.5	0.5	0.5	0.5	0.5	0.5	0.5	0.5	0	0	0	0	0	0	0	0	0	0
187.2	TRUE	Empty	Collapsin response mediator protein 1A (Fragment) OS=Mus musculus OX=10090 GN=Crmp1 PE=1 SV=1	Q71H75	Crmp1	21 kDa	TRUE	1	1	[]	unknown	0.5	0.5	0.5	0.5	0.5	0.5	0.5	0.5	0.5	0.5	0	0	0	0	0	0	0	0	0	0
512.2	TRUE	Empty	Protein furry homolog OS=Mus musculus OX=10090 GN=Fry PE=1 SV=1	A0A5F8MPN1 (+1)	Fry	339 kDa	TRUE	1	1	[]	unknown	0.5	0.5	0.5	0.5	0.5	0.5	0.5	0.5	0.5	0.5	0	0	0	0	0	0	0	0	0	0
548.1	TRUE	Empty	Predicted gene 7324 OS=Mus musculus OX=10090 GN=Gm7324 PE=4 SV=1	A0A2I3BRL8	Gm7324	42 kDa	TRUE	0.37	0.5	[]	unknown	0.5	0.5	0.5	0.5	0.5	0.5	0.5	0.5	0.5	2	0	0	0	0	0	0	0	0	0	1
546	TRUE	Empty	Guanine deaminase OS=Mus musculus OX=10090 GN=Gda PE=1 SV=1	Q9R111	Gda	51 kDa		0.37	2	[]	unknown	0.5	0.5	2	0.5	0.5	0.5	0.5	0.5	0.5	0.5	0	0	0.96	0	0	0	0	0	0	0
543	TRUE	Empty	Carbonyl reductase [NADPH] 1 OS=Mus musculus OX=10090 GN=Cbr1 PE=1 SV=1	A0A338P684	Cbr1	15 kDa		0.37	2	[]	unknown	0.5	0.5	2	0.5	0.5	0.5	0.5	0.5	0.5	0.5	0	0	1	0	0	0	0	0	0	0
534	TRUE	Empty	MISP family member 3 OS=Mus musculus OX=10090 GN=Misp3 PE=1 SV=1	A0A087WQ89	Misp3	23 kDa		1	1	[]	unknown	0.5	0.5	0.5	0.5	0.5	0.5	2	0.5	0.5	0.5	0	0	0	0	0	0	1	0	0	0
535	TRUE	Empty	Coronin-1A OS=Mus musculus OX=10090 GN=Coro1a PE=1 SV=5	O89053	Coro1a	51 kDa		0.37	2	[]	unknown	0.5	0.5	2	0.5	0.5	0.5	0.5	0.5	0.5	0.5	0	0	1	0	0	0	0	0	0	0
536	TRUE	Empty	Acetyl-CoA carboxylase 1 OS=Mus musculus OX=10090 GN=Acaca PE=1 SV=1	ACACA_MOUSE		?		0.37	2	[]	unknown	2	0.5	0.5	0.5	0.5	0.5	0.5	0.5	0.5	0.5	1	0	0	0	0	0	0	0	0	0
537	TRUE	Empty	RuvB-like 1 OS=Mus musculus OX=10090 GN=Ruvbl1 PE=1 SV=1	P60122	Ruvbl1	50 kDa		0.37	2	[]	unknown	0.5	0.5	2	0.5	0.5	0.5	0.5	0.5	0.5	0.5	0	0	1	0	0	0	0	0	0	0
538	TRUE	Empty	Isoform 2 of Unconventional myosin-Ib OS=Mus musculus OX=10090 GN=Myo1b	MYO1B_MOUSE		?		1	1	[]	unknown	0.5	0.5	0.5	0.5	0.5	0.5	2	0.5	0.5	0.5	0	0	0	0	0	0	1	0	0	0
539	TRUE	Empty	Coatomer subunit delta OS=Mus musculus OX=10090 GN=Arcn1 PE=1 SV=2	Q5XJY5	Arcn1	57 kDa		0.37	2	[]	unknown	0.5	0.5	2	0.5	0.5	0.5	0.5	0.5	0.5	0.5	0	0	1	0	0	0	0	0	0	0
540	TRUE	Empty	Alpha-2-HS-glycoprotein OS=Mus musculus OX=10090 GN=Ahsg PE=1 SV=1	P29699	Ahsg	37 kDa		0.37	2	[]	unknown	0.5	0.5	2	0.5	0.5	0.5	0.5	0.5	0.5	0.5	0	0	1	0	0	0	0	0	0	0
541	TRUE	Empty	Non-specific lipid-transfer protein OS=Mus musculus OX=10090 GN=Scp2 PE=1 SV=3	NLTP_MOUSE		?		0.37	2	[]	unknown	0.5	0.5	2	0.5	0.5	0.5	0.5	0.5	0.5	0.5	0	0	1	0	0	0	0	0	0	0
542	TRUE	Empty	Alcohol dehydrogenase 1 OS=Mus musculus OX=10090 GN=Adh1 PE=1 SV=2	P00329	Adh1	40 kDa		0.37	0.5	[]	unknown	0.5	0.5	0.5	0.5	0.5	0.5	0.5	0.5	0.5	2	0	0	0	0	0	0	0	0	0	1
544	TRUE	Empty	Eosinophil-associated ribonuclease 10 OS=Mus musculus OX=10090 GN=Ear10 PE=3 SV=1	Q923L6	Ear10	18 kDa	TRUE	0.37	2	[]	unknown	0.5	0.5	2	0.5	0.5	0.5	0.5	0.5	0.5	0.5	0	0	1	0	0	0	0	0	0	0
368.2	TRUE	Empty	Plastin-1 OS=Mus musculus OX=10090 GN=Pls1 PE=1 SV=1	Q3V0K9	Pls1	70 kDa	TRUE	1	1	[]	unknown	0.5	0.5	0.5	0.5	0.5	0.5	2	0.5	0.5	0.5	0	0	0	0	0	0	1	0	0	0
545	TRUE	Empty	Proteasome activator complex subunit 1 OS=Mus musculus OX=10090 GN=Psme1 PE=1 SV=1	G3UXY0 (+3)	Psme1	26 kDa		0.37	2	[]	unknown	0.5	0.5	2	0.5	0.5	0.5	0.5	0.5	0.5	0.5	0	0	1	0	0	0	0	0	0	0
547	TRUE	Empty	Coronin-2B OS=Mus musculus OX=10090 GN=Coro2b PE=1 SV=2	Q8BH44	Coro2b	55 kDa		1	1	[]	unknown	0.5	0.5	0.5	0.5	0.5	0.5	2	0.5	0.5	0.5	0	0	0	0	0	0	0.93	0	0	0
483.2	TRUE	Empty	Spectrin beta chain OS=Mus musculus OX=10090 GN=Sptbn2 PE=1 SV=1	Q68FG2	Sptbn2	271 kDa	TRUE	1	1	[]	unknown	0.5	0.5	0.5	0.5	0.5	0.5	0.5	0.5	0.5	0.5	0	0	0	0	0	0	0	0	0	0
532.2	TRUE	Empty	Heterogeneous nuclear ribonucleoprotein D-like OS=Mus musculus OX=10090 GN=Hnrnpdl PE=1 SV=1	D3YTQ3	Hnrnpdl	46 kDa	TRUE	1	1	[]	unknown	0.5	0.5	0.5	0.5	0.5	0.5	0.5	0.5	0.5	0.5	0	0	0	0	0	0	0	0	0	0
434.2	TRUE	Empty	Serine protease inhibitor A3M OS=Mus musculus OX=10090 GN=Serpina3m PE=1 SV=2	Q03734	Serpina3m	47 kDa	TRUE	1	1	[]	unknown	0.5	0.5	0.5	0.5	0.5	0.5	0.5	0.5	0.5	0.5	0	0	0	0	0	0	0	0	0	0
70.8	TRUE	Empty	Myosin, heavy chain 15 OS=Mus musculus OX=10090 GN=Myh15 PE=1 SV=1	E9Q264	Myh15	222 kDa	TRUE	1	1	[]	unknown	0.5	0.5	0.5	0.5	0.5	0.5	0.5	0.5	0.5	0.5	0	0	0	0	0	0	0	0	0	0
70.9	TRUE	Empty	Myosin-7 OS=Mus musculus OX=10090 GN=Myh7 PE=2 SV=1	Q91Z83	Myh7	223 kDa	TRUE	1	1	[]	unknown	0.5	0.5	0.5	0.5	0.5	0.5	0.5	0.5	0.5	0.5	0	0	0	0	0	0	0	0	0	0
70.1	TRUE	Empty	Myosin-6 OS=Mus musculus OX=10090 GN=Myh6 PE=1 SV=2	Q02566	Myh6	224 kDa	TRUE	1	1	[]	unknown	0.5	0.5	0.5	0.5	0.5	0.5	0.5	0.5	0.5	0.5	0	0	0	0	0	0	0	0	0	0
483.3	TRUE	Empty	Spectrin beta chain OS=Mus musculus OX=10090 GN=Sptb PE=1 SV=1	E9Q397 (+1)	Sptb	246 kDa	TRUE	1	1	[]	unknown	0.5	0.5	0.5	0.5	0.5	0.5	0.5	0.5	0.5	0.5	0	0	0	0	0	0	0	0	0	0
548.2	TRUE	Empty	RNA-binding motif protein, X chromosome OS=Mus musculus OX=10090 GN=Rbmx PE=1 SV=1	A2AFI3	Rbmx	33 kDa	TRUE	1	1	[]	unknown	0.5	0.5	0.5	0.5	0.5	0.5	0.5	0.5	0.5	0.5	0	0	0	0	0	0	0	0	0	0
70.11	TRUE	Empty	Myosin-3 OS=Mus musculus OX=10090 GN=Myh3 PE=2 SV=2	P13541	Myh3	224 kDa	TRUE	1	1	[]	unknown	0.5	0.5	0.5	0.5	0.5	0.5	0.5	0.5	0.5	0.5	0	0	0	0	0	0	0	0	0	0
459.3	TRUE	Empty	Glycogen phosphorylase, liver form OS=Mus musculus OX=10090 GN=Pygl PE=1 SV=4	Q9ET01	Pygl	97 kDa	TRUE	1	1	[]	unknown	0.5	0.5	0.5	0.5	0.5	0.5	0.5	0.5	0.5	0.5	0	0	0	0	0	0	0	0	0	0
533.2	TRUE	Empty	Carbonic anhydrase 1 (Fragment) OS=Mus musculus OX=10090 GN=Car1 PE=1 SV=1	D3YYQ4	Car1	10 kDa	TRUE	1	1	[]	unknown	0.5	0.5	0.5	0.5	0.5	0.5	0.5	0.5	0.5	0.5	0	0	0	0	0	0	0	0	0	0
532.3	TRUE	Empty	RNA-binding motif 31, Y-linked OS=Mus musculus OX=10090 GN=Rbm31y PE=2 SV=1	Q9D3U4	Rbm31y	63 kDa	TRUE	1	1	[]	unknown	0.5	0.5	0.5	0.5	0.5	0.5	0.5	0.5	0.5	0.5	0	0	0	0	0	0	0	0	0	0
511.3	TRUE	Empty	Tensin-3 OS=Mus musculus OX=10090 GN=Tns3 PE=1 SV=1	TENS3_MOUSE		?	TRUE	1	1	[]	unknown	0.5	0.5	0.5	0.5	0.5	0.5	0.5	0.5	0.5	0.5	0	0	0	0	0	0	0	0	0	0
70.12	TRUE	Empty	Myosin, heavy polypeptide 13, skeletal muscle OS=Mus musculus OX=10090 GN=Myh13 PE=1 SV=1	B1AR69	Myh13	224 kDa	TRUE	1	1	[]	unknown	0.5	0.5	0.5	0.5	0.5	0.5	0.5	0.5	0.5	0.5	0	0	0	0	0	0	0	0	0	0
70.13	TRUE	Empty	Myosin-1 OS=Mus musculus OX=10090 GN=Myh1 PE=1 SV=1	Q5SX40	Myh1	223 kDa	TRUE	1	1	[]	unknown	0.5	0.5	0.5	0.5	0.5	0.5	0.5	0.5	0.5	0.5	0	0	0	0	0	0	0	0	0	0
419.2	TRUE	Empty	Rap1 GTPase-activating protein 2 OS=Mus musculus OX=10090 GN=Rap1gap2 PE=1 SV=1	A0A171EBK8	Rap1gap2	84 kDa	TRUE	1	1	[]	unknown	0.5	0.5	0.5	0.5	0.5	0.5	0.5	0.5	0.5	0.5	0	0	0	0	0	0	0	0	0	0
392.2	TRUE	Empty	Rab GDP dissociation inhibitor alpha OS=Mus musculus OX=10090 GN=Gdi1 PE=1 SV=3	P50396	Gdi1	51 kDa	TRUE	1	1	[]	unknown	0.5	0.5	0.5	0.5	0.5	0.5	0.5	0.5	0.5	0.5	0	0	0	0	0	0	0	0	0	0
END OF FILE
