# Supplementary figures and images for: Inhibition of PDIA3 in club cells attenuates osteopontin production and lung fibrosis
Source: HighWire-hosted journal article supplement (doi:10.1136/thoraxjnl-2021-216882), 2021-08-16

Figure S5

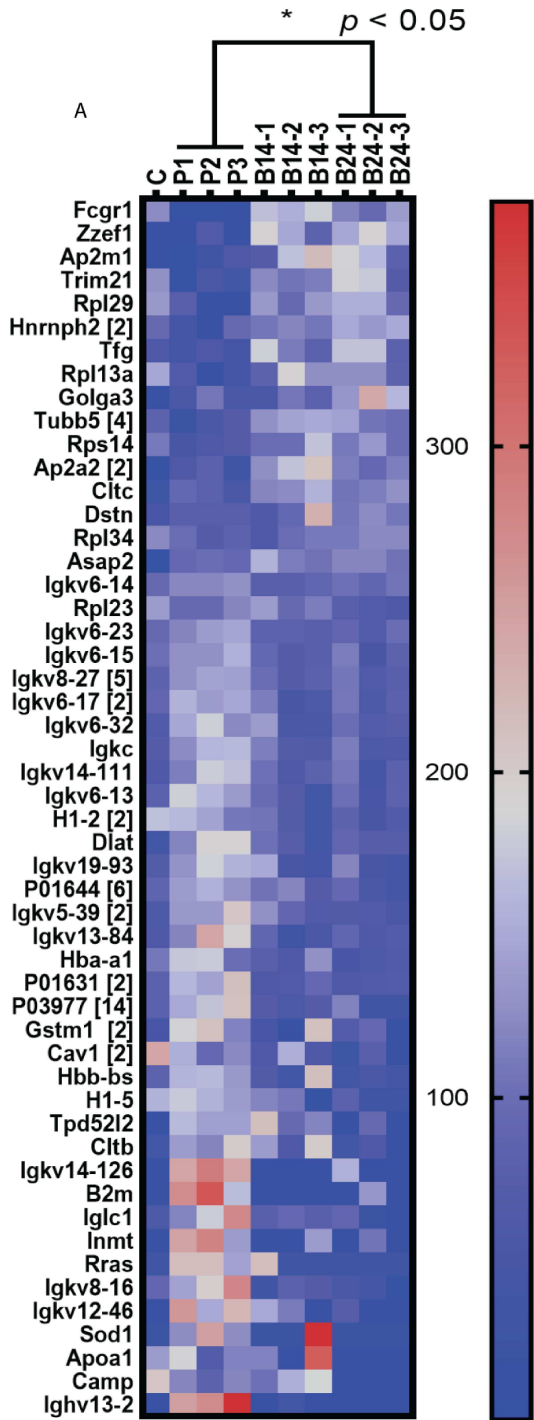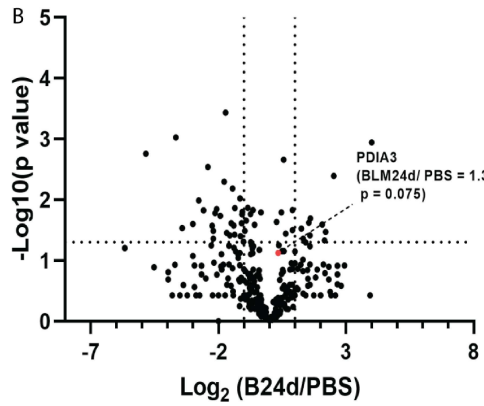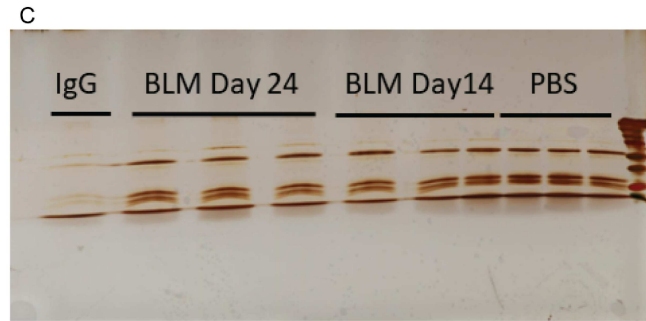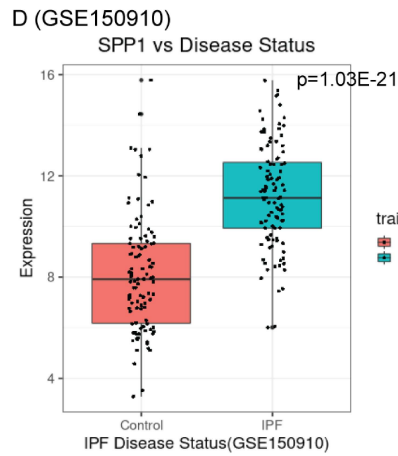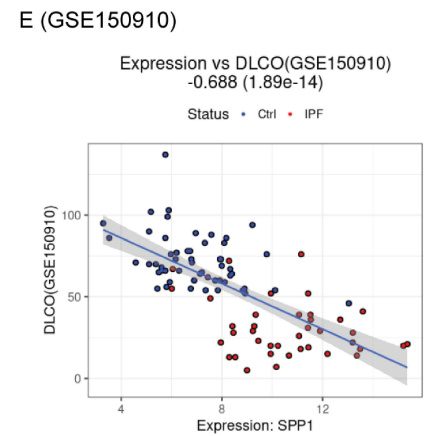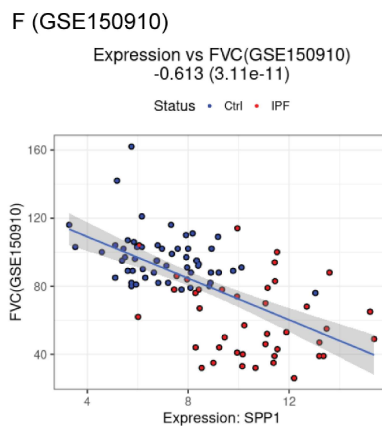

Supplement: thoraxjnl-2021-216882supp012_data_supplement.pdf [file thoraxjnl-2021-216882supp012_data_supplement.pdf]

Figure S6

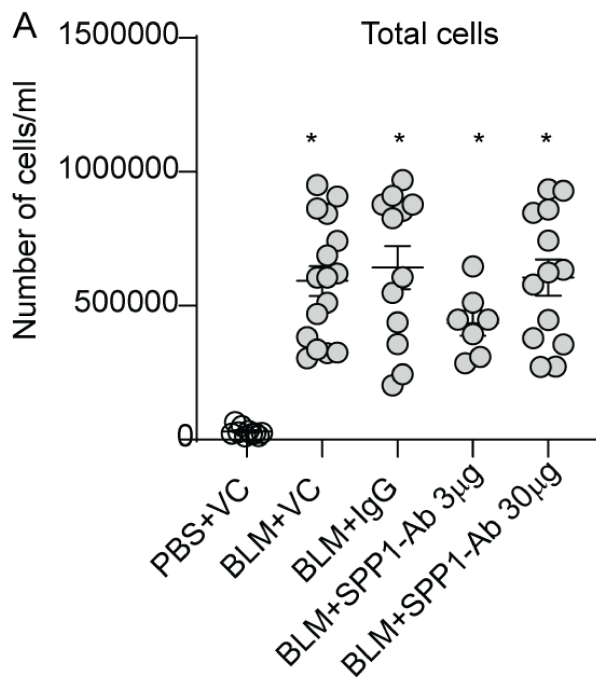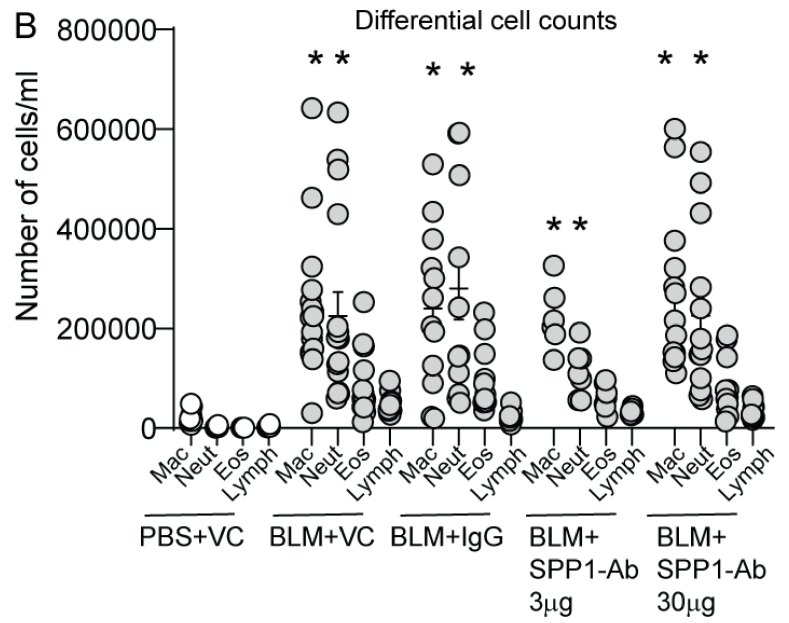

Supplement: thoraxjnl-2021-216882supp014_data_supplement.pdf [file thoraxjnl-2021-216882supp014_data_supplement.pdf]

Figure S2

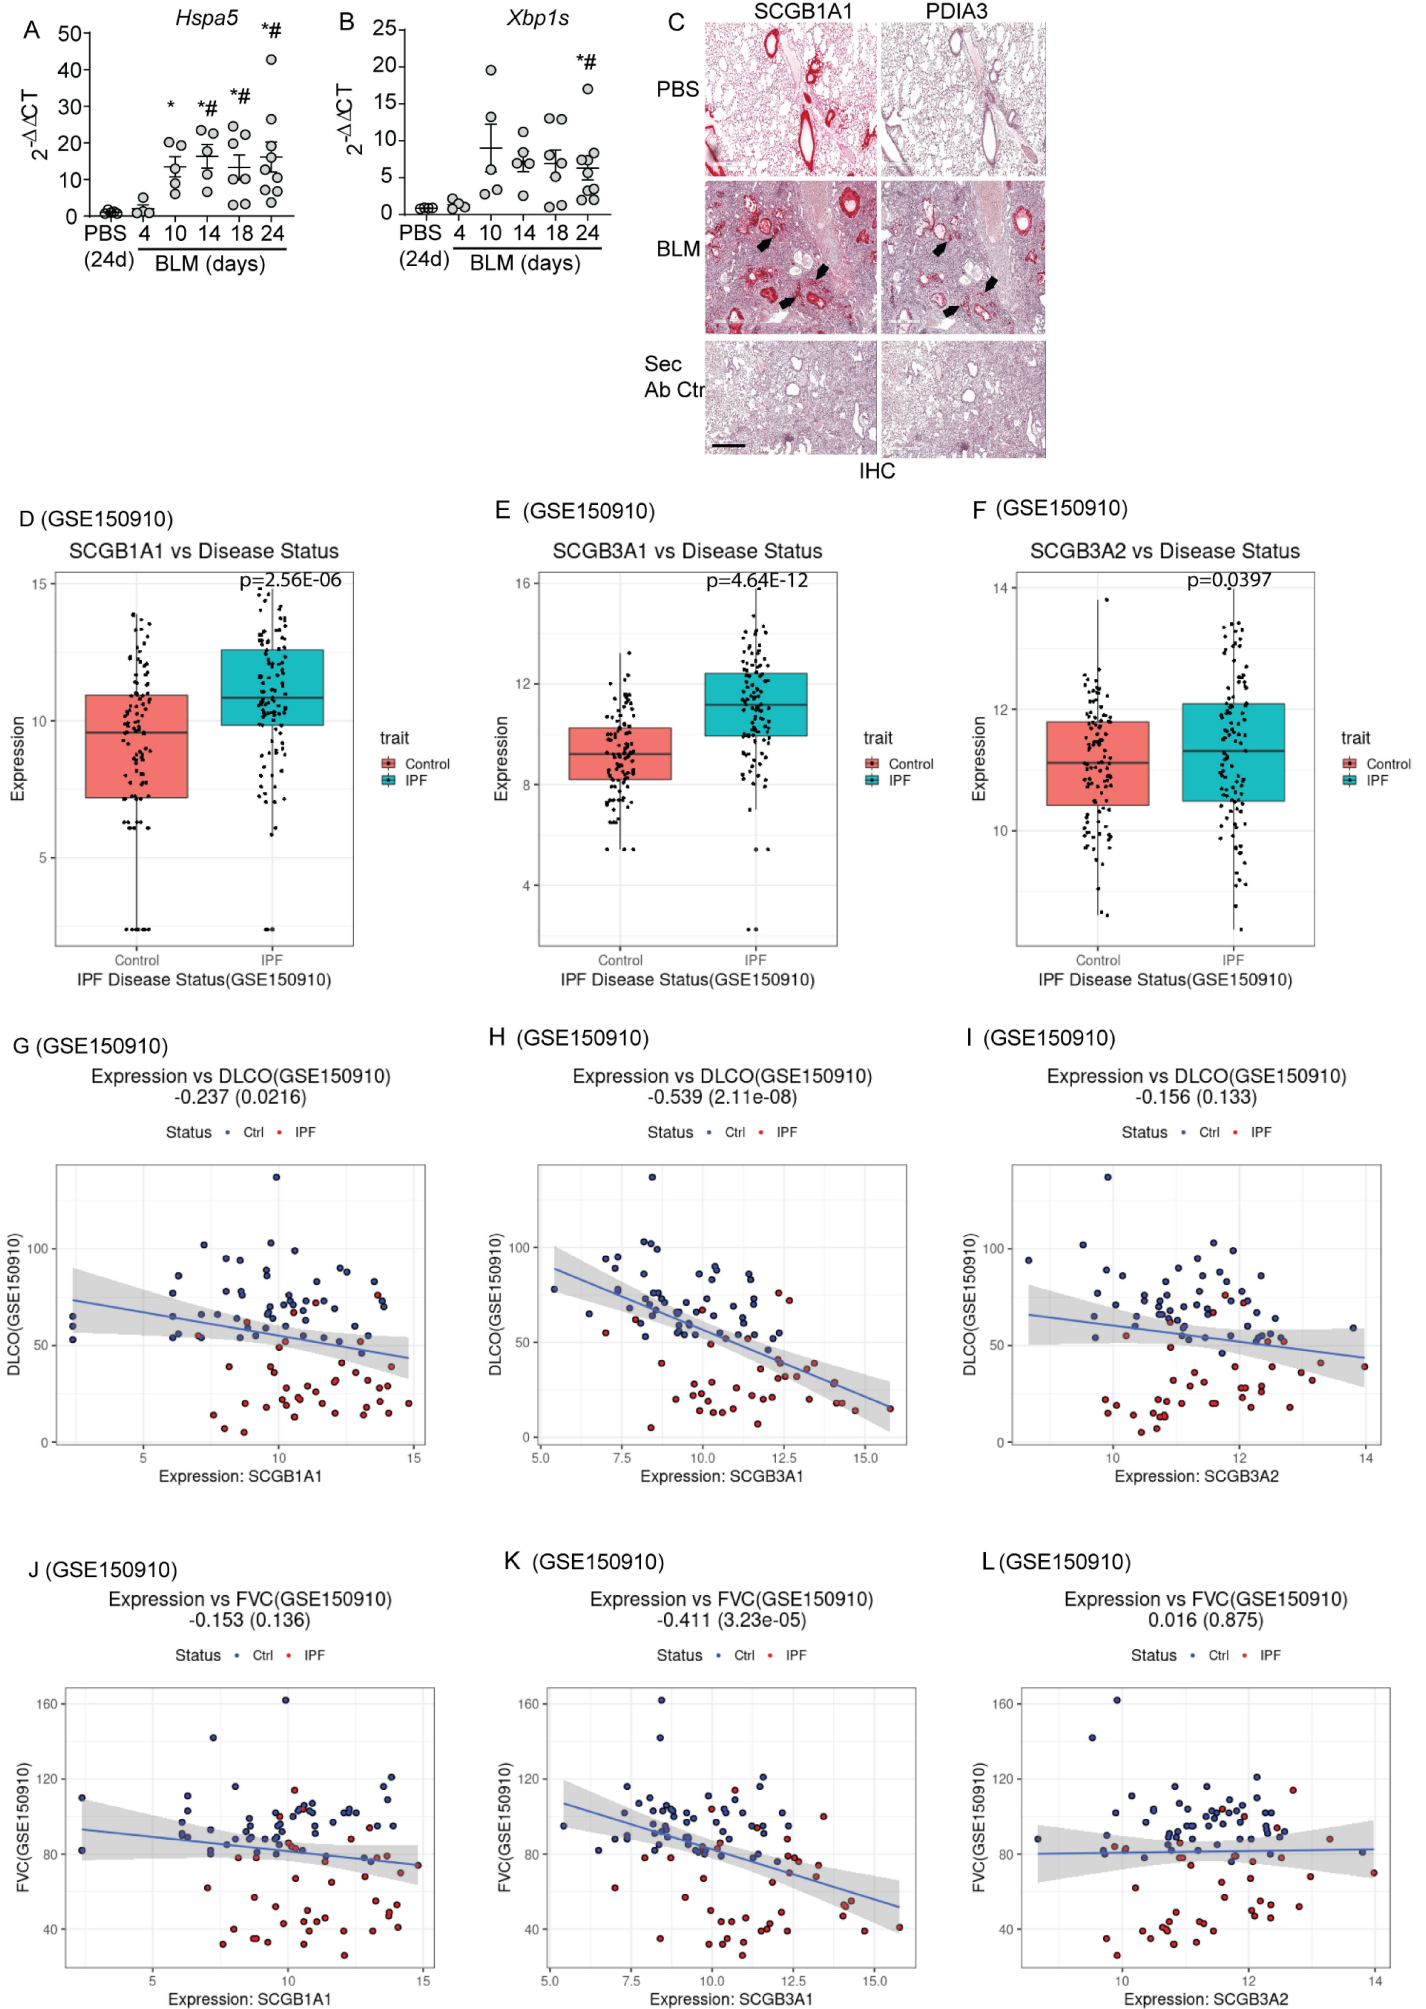

Supplement: thoraxjnl-2021-216882supp005_data_supplement.pdf [file thoraxjnl-2021-216882supp005_data_supplement.pdf]

Figure S3

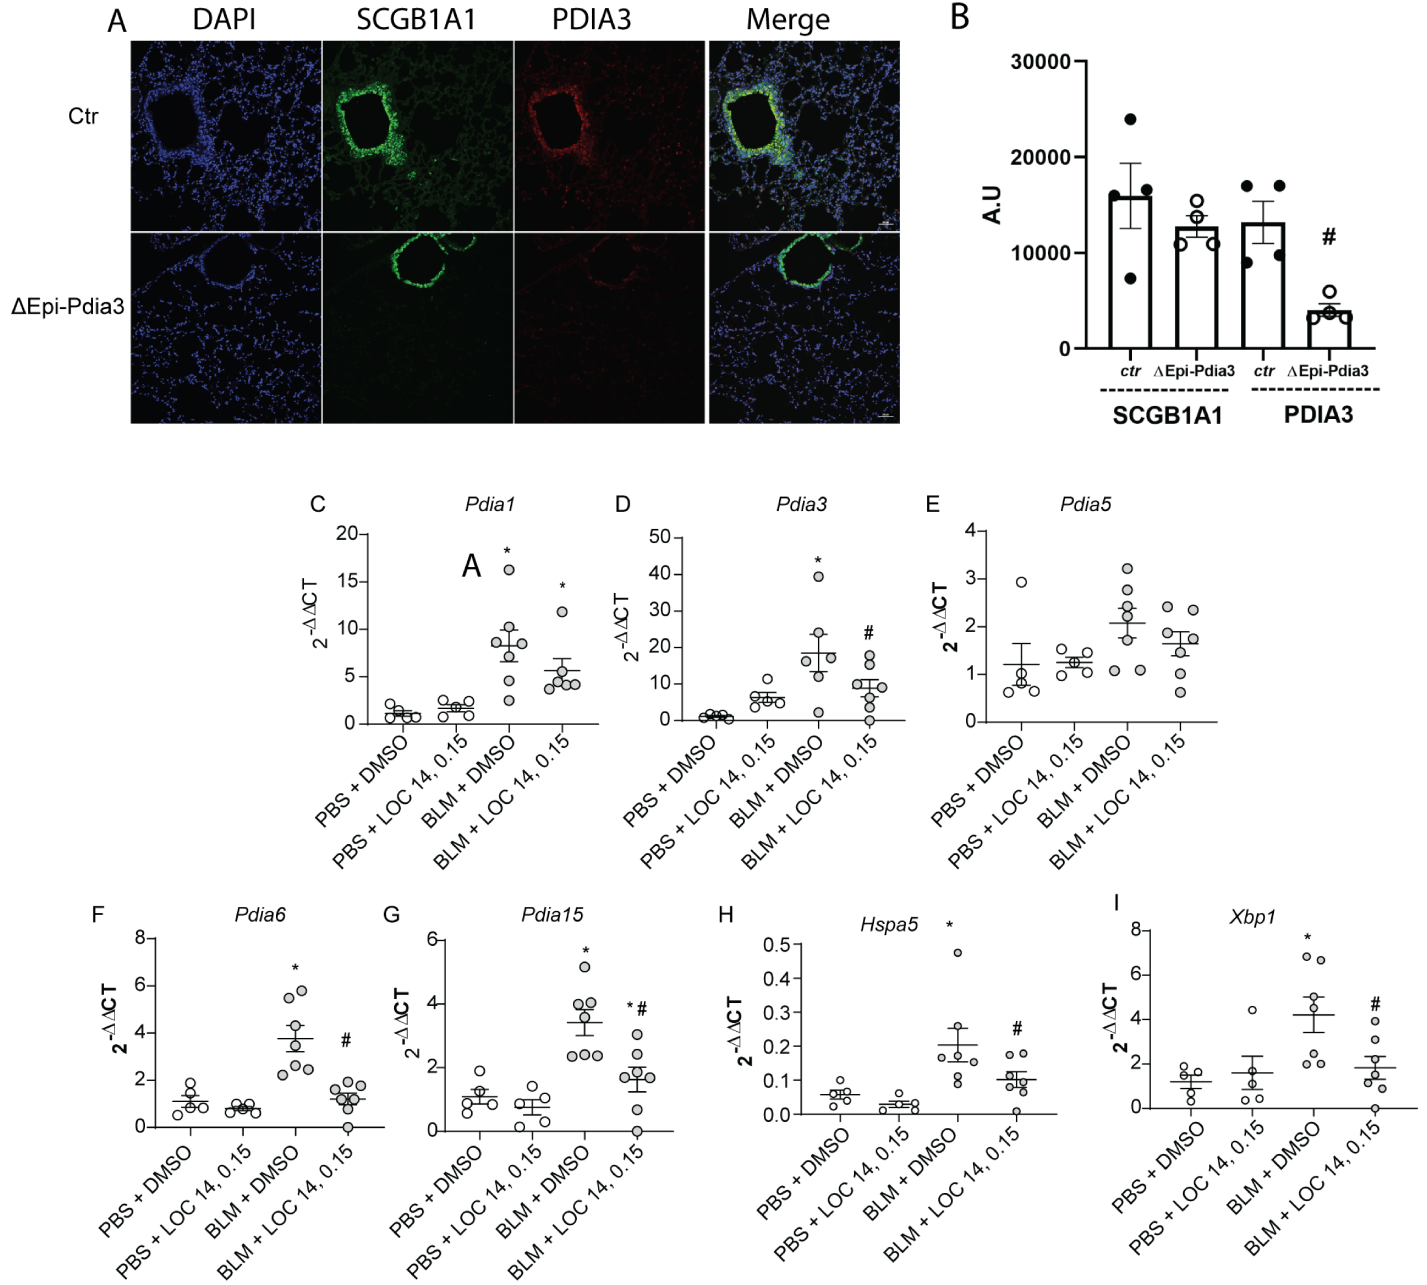

Supplement: thoraxjnl-2021-216882supp007_data_supplement.pdf [file thoraxjnl-2021-216882supp007_data_supplement.pdf]

Figure S4

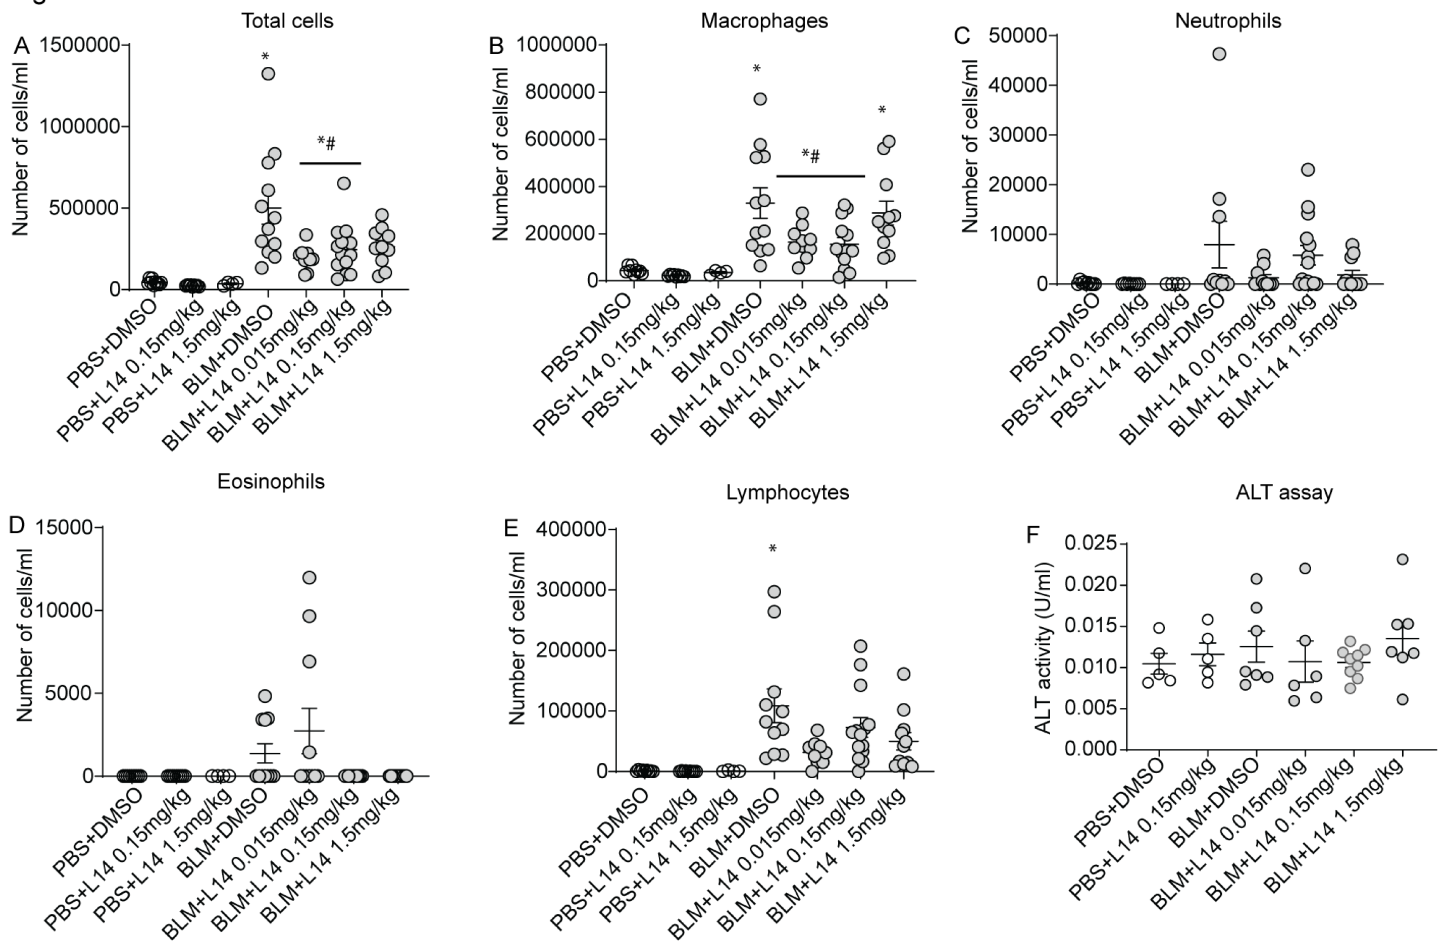

Supplement: thoraxjnl-2021-216882supp008_data_supplement.pdf [file thoraxjnl-2021-216882supp008_data_supplement.pdf]
